# Supplementary material for: Design, synthesis and insecticidal activity of novel analogues of flubendiamide containing alkoxyhexafluoroisopropyl groups
Source: Royal Society of Chemistry journal article supplement (doi:10.1039/d0ra07121h), 2020-01-01

# Supporting Information

## Design, synthesis and insecticidal activity of novel analogues of flubendiamide containing alkoxyhexafluoroisopropyl group

Xianghu Zhao,<sup>†</sup> Sixue Xu<sup>†</sup>, Chuan Liu, Jingjing He, Chunmei Li, Yupian Deng, and Song Cao\*

Shanghai Key Laboratory of Chemical Biology, School of Pharmacy, East China University of Science and Technology (ECUST), Shanghai 200237, China

<sup>†</sup>These authors have equally contributed to this article.

### Table of contents

|                                                                                                          |      |
|----------------------------------------------------------------------------------------------------------|------|
| 1. Procedures for the synthesis of compounds in Scheme 1 .....                                           | S 2  |
| 2. Procedures for the synthesis of compounds in Scheme 2 .....                                           | S 3  |
| 3. General procedure for preparing intermediate 2 .....                                                  | S 4  |
| 4. References .....                                                                                      | S 4  |
| 5. <sup>1</sup> H NMR spectrum of several key intermediates .....                                        | S 5  |
| 6. Analytical data of target compounds 8a'-c' and 8a-q .....                                             | S 11 |
| 7. <sup>1</sup> H, <sup>13</sup> C, <sup>19</sup> F NMR and HRMS (ESI) spectra of target compounds ..... | S 24 |

## 1. Procedures for the synthesis of compounds in Scheme 1.

*Synthesis of 2-methyl-4-(4,4,5,5-tetramethyl-1,3,2-dioxaborolan-2-yl)aniline (2')*. Boronic acid pinacol esters **2'** was prepared from 4-bromo-2-methylaniline **1'** and B<sub>2</sub>pin<sub>2</sub> according to the reported procedure.<sup>1</sup>

*Synthesis of fluorine-containing anilines 3a' and 3b'*. A solution of PdCl<sub>2</sub>(PPh<sub>3</sub>)<sub>2</sub> (280.8 mg, 4 mol%), PPh<sub>3</sub> (419.2 mg, 16 mol%), NaOH (1.6 g, 40.0 mmol, 4.0 equiv) and aniline **2'** (2.8 g, 12 mmol, 1.2 equiv) in diglyme/THF = 10 mL/10 mL was stirred at 130 °C under argon atmosphere for about 15 minutes. Subsequently, 1,2,3-trifluoro-5-iodobenzene or 2-bromo-3,3,3-trifluoroprop-1-ene (10.0 mmol, 1.0 equiv) was added to the mixture via a syringe. Stirring was continued at 130 °C for 10 h. After the completion of reaction, the reaction mixture was quenched with H<sub>2</sub>O (20 mL) and extracted with ethyl acetate (10 mL×3). The organic layer was separated and dried over Na<sub>2</sub>SO<sub>4</sub>, filtered and evaporated under vacuum. The crude product was purified by column chromatography on silica gel using *n*-hexane/ethyl acetate (10/1) as eluent to afford the pure compounds **3a'** (85%) and **3b'** (55%).

*Synthesis of fluorine-containing aniline 3c'*. A solution of aniline **2'** (1.16 g, 5 mmol, 1.0 equiv) and *m*-CPBA (10 mmol) in H<sub>2</sub>O/EtOH = 5 mL/10 mL was stirred at 25 °C under argon atmosphere for about 6 h. After the completion of reaction, the reaction mixture was quenched with saturated NaHCO<sub>3</sub> (20 mL) and extracted with ethyl acetate (10 mL×3). The organic layer was separated and dried over Na<sub>2</sub>SO<sub>4</sub>, filtered and evaporated under vacuum. Without further purification, the crude product was allowed to react with the solution of 2-bromo-3,3,3-trifluoroprop-1-ene (2.09 g, 12 mmol), KO<sup>*t*</sup>Bu (1.23 g, 11 mmol) in CH<sub>3</sub>CN (25 mL) at 70 °C. After 12 h, the reaction mixture was quenched with H<sub>2</sub>O (20 mL) and extracted with ethyl acetate (10 mL×3). The organic layer was separated and dried over Na<sub>2</sub>SO<sub>4</sub>, filtered and evaporated under vacuum. The crude product was purified by column chromatography on silica gel using *n*-hexane/ethyl acetate (10/1) as eluent to afford the pure compound **3c'** (47%).

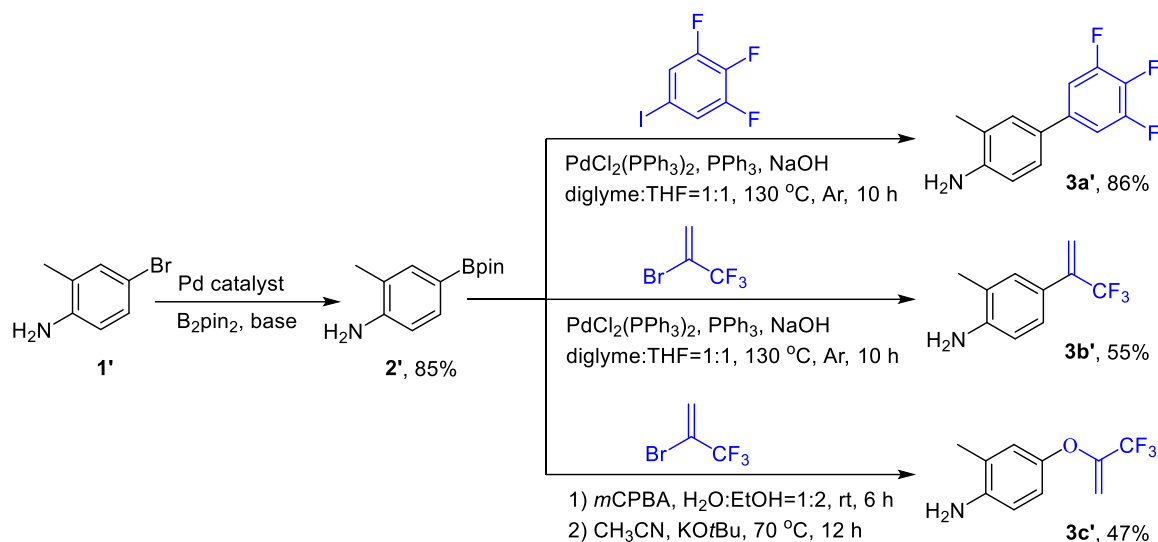

**Scheme 1.** Synthesis of fluorine-containing anilines **3a'–c'**.

## 2. Procedures for the synthesis of compounds in Scheme 2.

*Synthesis of 2-(4-amino-3-methylphenyl)-1,1,1,3,3,3-hexafluoropropan-2-ol (2).* Intermediate **2** was prepared from 2-methylaniline according to the reported procedure.<sup>2</sup>

*Synthesis of 4-(1,1,1,3,3,3-hexafluoro-2-alkoxypropan-2-yl)-2-methylaniline (3a–q).* A solution of **2** (2.73 g, 10 mmol),  $\text{Cs}_2\text{CO}_3$  (6.51 g, 20 mmol) in DMF (20 mL) was stirred at 25 °C for about 30 minutes. Subsequently, RX (**1a–q**, 12 mmol) was added to the mixture. Stirring was continued at 25 °C for 0.5–3 h (monitored by TLC). After the completion of reaction, the reaction mixture was quenched with  $\text{H}_2\text{O}$  (20 mL) and extracted with ethyl acetate (20 mL×3). The organic layer was separated and dried over  $\text{Na}_2\text{SO}_4$ , filtered and evaporated under vacuum to afford the crude products **3** in the range of yields (77–99%) (>98% purity, determined by GC-MS or NMR spectroscopy), except for **3e**, **3i** and **3k** (the yields of these three compounds were about 80% and they should be purified by silica gel column chromatography). Most of these intermediates **3** were directly reacted with intermediate **6** without purification.

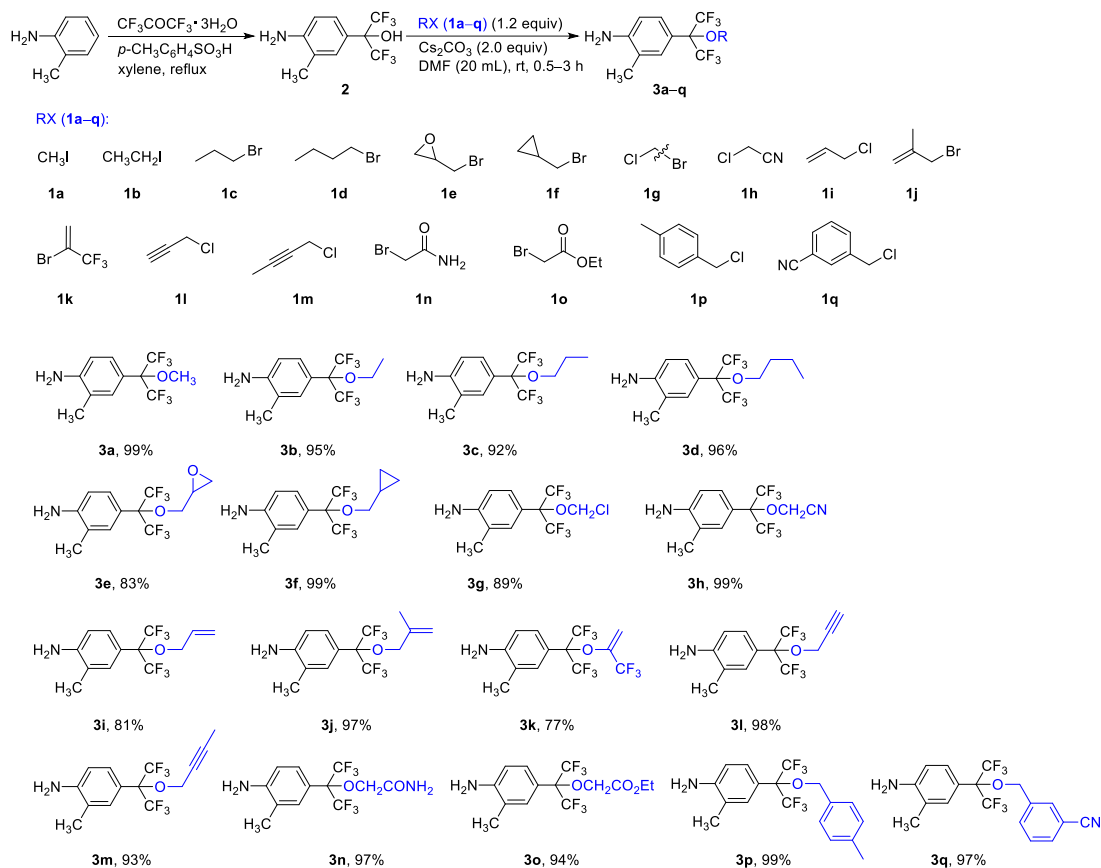

**Scheme 2.** Synthesis of novel anilines **3a-q** from various RX and **2**

### 3. General procedure for preparing intermediate **2**

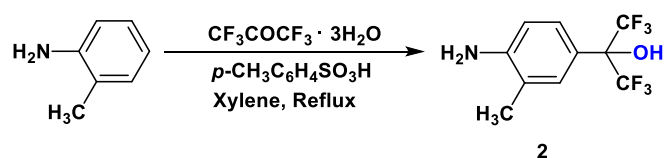

A solution of hexafluoroacetone trihydrate (2.42 g, 11 mmol) and *p*-toluenesulfonic acid (0.1 g, 0.6 mmol) in 5 mL of xylene was added to *o*-toluidine (1.07 g, 10 mmol) at 90 °C. The mixture was then stirred at 130 °C for about 12 h (monitored by TLC or GC-MS). After the completion of reaction, the solution was cooled to room temperature and the solid precipitate was filtered, washed by petroleum ether. The crude products **2** were obtained (95% yield, 2.58 g).

### 4. References

- (1) B. H. Lipshutz, R. Moser and K. R. Voigtritter, *Isr. J. Chem.* 2010, **50**, 691.
- (2) R. Masciadri, M. Kamer and N. Nock, *Eur. J. Org. Chem.* 2003, 4286

## 5. $^1\text{H}$ NMR spectrum of several key intermediates

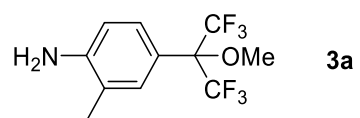

Yield: 90%; Oil.  $^1\text{H}$  NMR (400 MHz,  $\text{CDCl}_3$ )  $\delta$  = 7.25–7.21 (m, 2H), 6.70 (d,  $J$  = 8.8 Hz, 1H), 3.79 (s, 2H,  $\text{NH}_2$ ), 3.44 (s, 3H,  $\text{OCH}_3$ ), 2.19 (s, 3H,  $\text{CH}_3$ ) ppm.

### $^1\text{H}$ NMR spectrum of **3a**

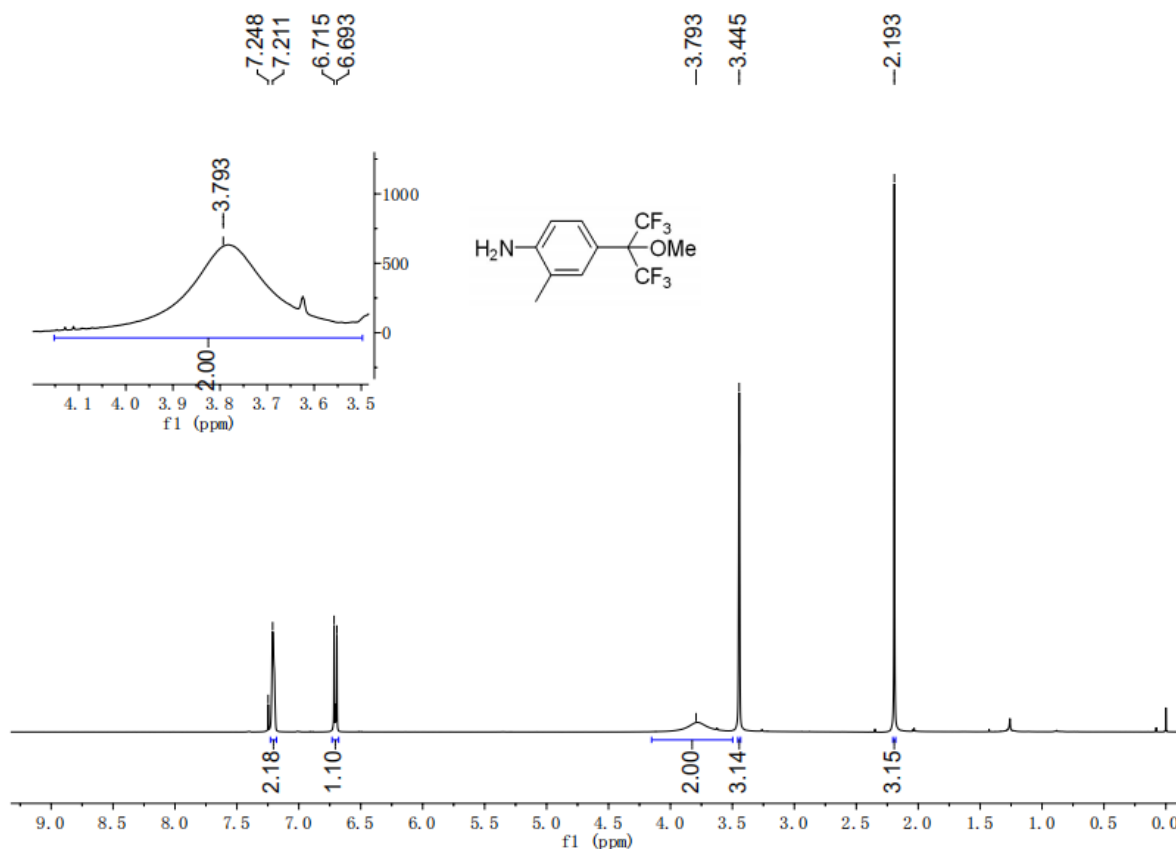

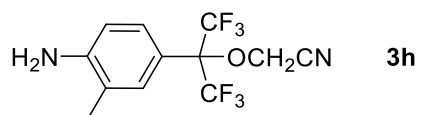

Yield: 96%; Oil.  $^1\text{H NMR}$  (400 MHz,  $\text{CDCl}_3$ )  $\delta = 7.26\text{--}7.21$  (m, 2H), 6.74 (d,  $J = 9.2$  Hz, 1H), 4.32 (s, 2H,  $\text{OCH}_2$ ) 3.88 (s, 2H,  $\text{NH}_2$ ), 2.20 (s, 3H,  $\text{CH}_3$ ) ppm.

**$^1\text{H NMR}$  spectrum of 3h**

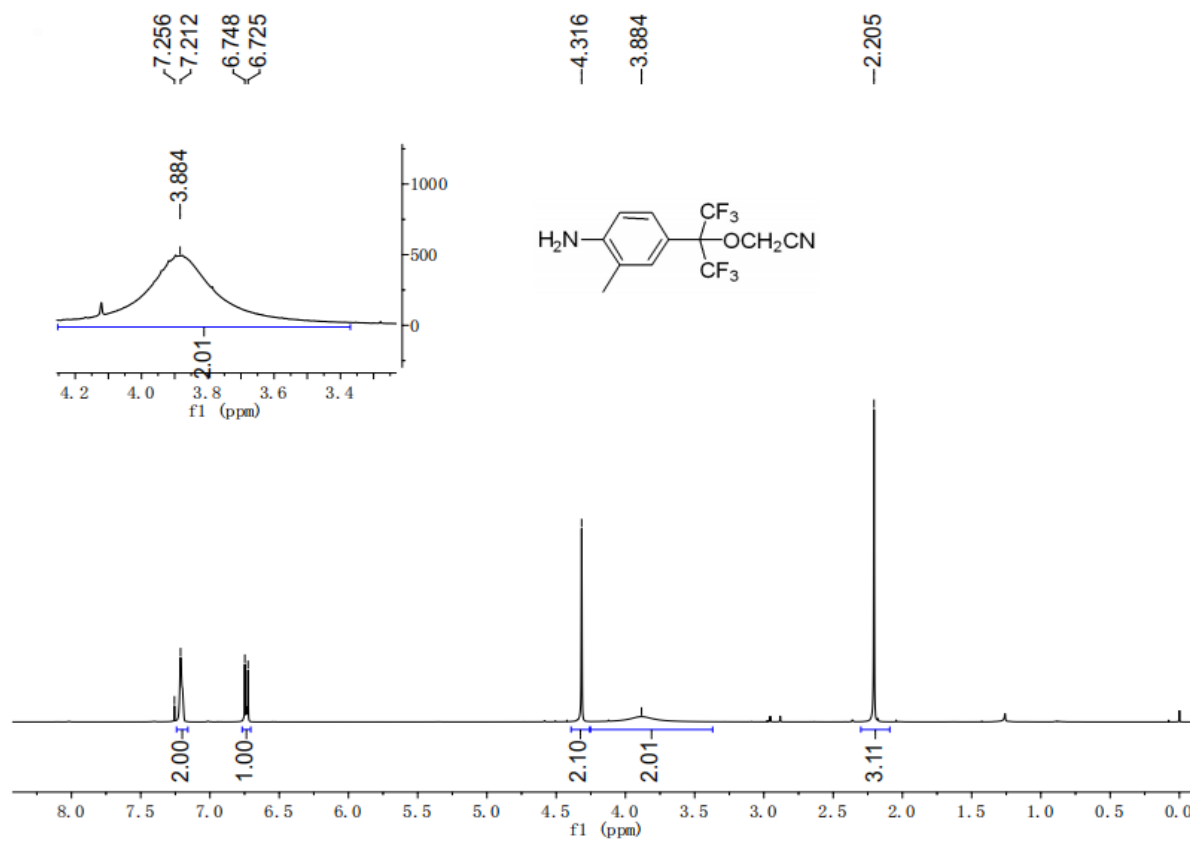

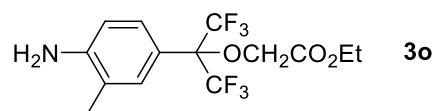

Yield: 92%; Oil.  $^1\text{H NMR}$  (400 MHz,  $\text{CDCl}_3$ )  $\delta$  = 7.28–7.26 (m, 2H), 6.70 (d,  $J$  = 8.4 Hz, 1H), 4.25 (q,  $J$  = 7.2 Hz, 2H), 4.15 (s, 2H,  $\text{OCH}_2$ ) 3.85 (s, 2H,  $\text{NH}_2$ ), 2.17 (s, 3H), 1.29 (t,  $J$  = 7.2 Hz, 3H) ppm.

**$^1\text{H NMR}$  spectrum of 3o**

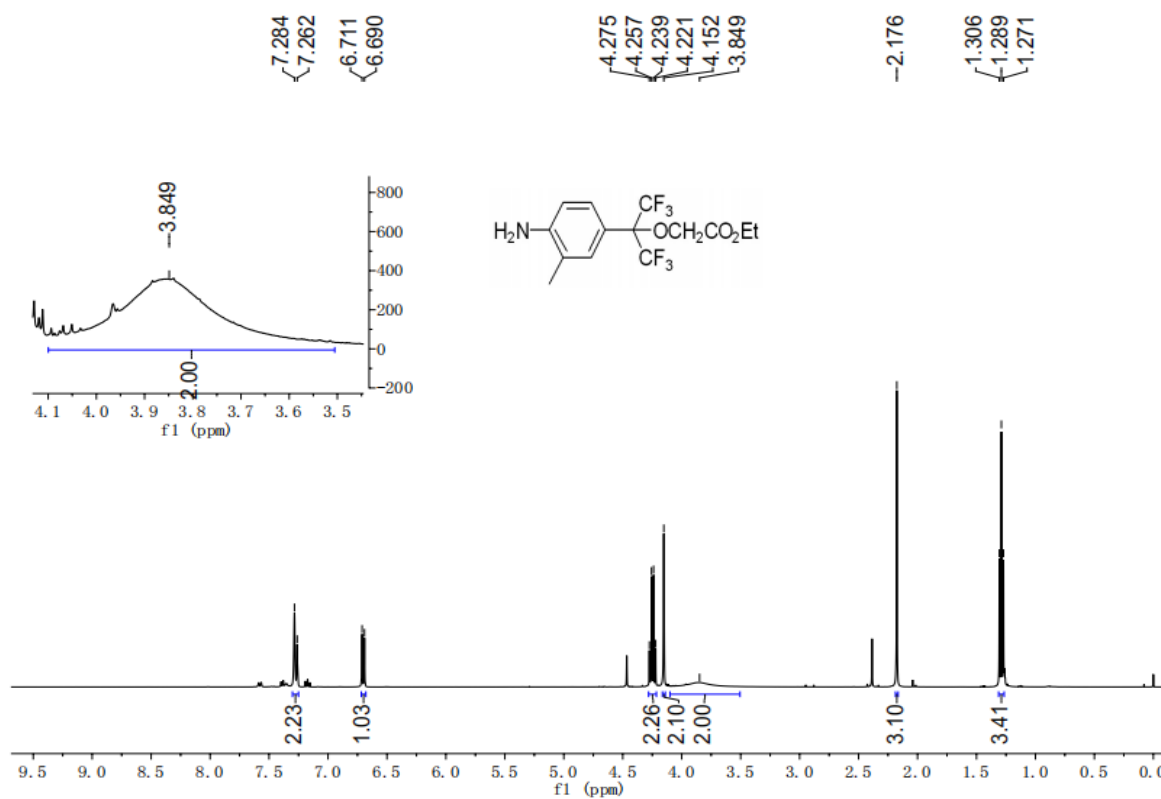

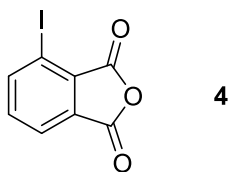

White solid; m.p.: 156.4–158.7 °C.  $^1\text{H NMR}$  (400 MHz,  $\text{CDCl}_3$ )  $\delta$  = 8.31 (dd,  $J$  = 7.6, 0.8 Hz, 1H), 8.01 (dd,  $J$  = 7.6, 0.8 Hz, 1H) 7.60–7.55 (m, 1H) ppm.

**$^1\text{H NMR}$  spectrum of 4**

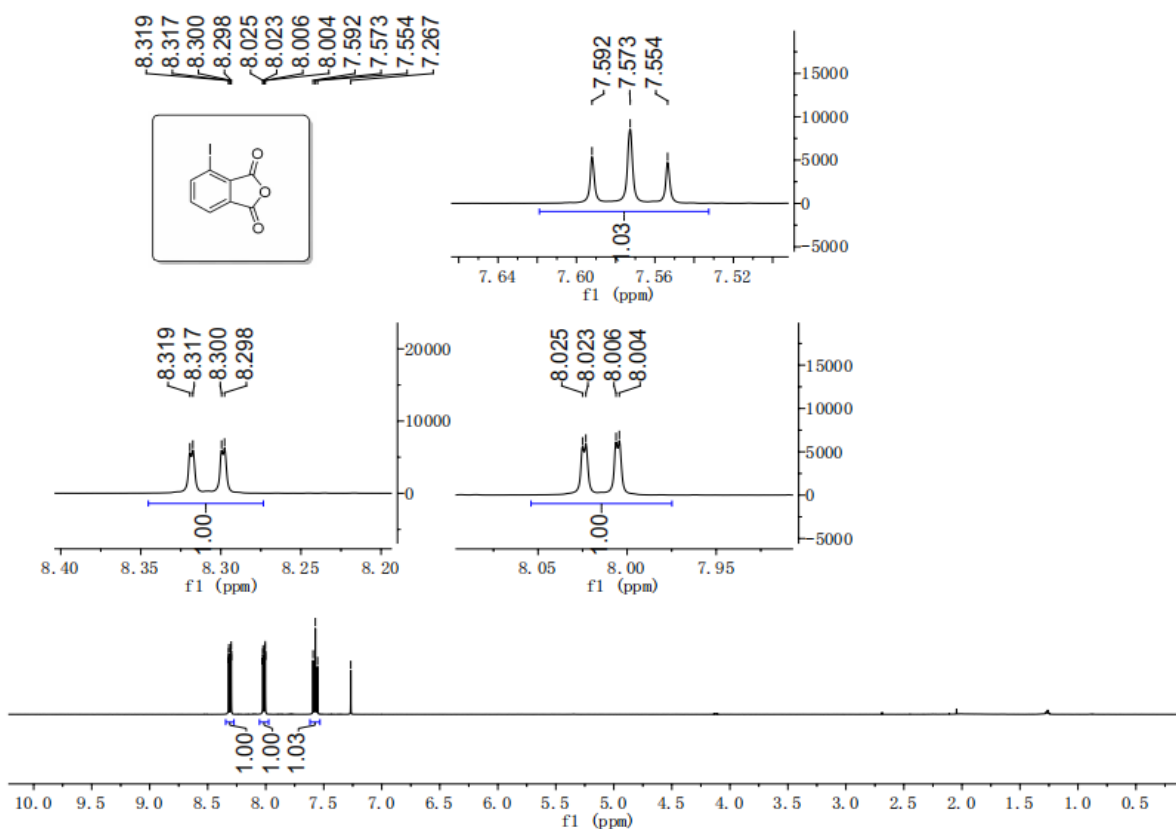



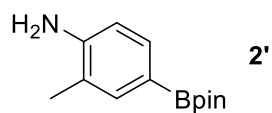

Yield: 85%; Yellow solid; m.p.: 138.1–140.3 °C.  $^1\text{H NMR}$  (400 MHz,  $\text{CDCl}_3$ )  $\delta$  = 7.51 (s, 1H), 7.50 (d,  $J$  = 8.4 Hz, 1H), 6.65 (d,  $J$  = 8.0 Hz, 1H), 3.74 (s, 2H,  $\text{NH}_2$ ), 2.15 (s, 3H,  $\text{CH}_3$ ), 1.32 (s, 12H) ppm.

**$^1\text{H NMR}$  spectrum of 2'**

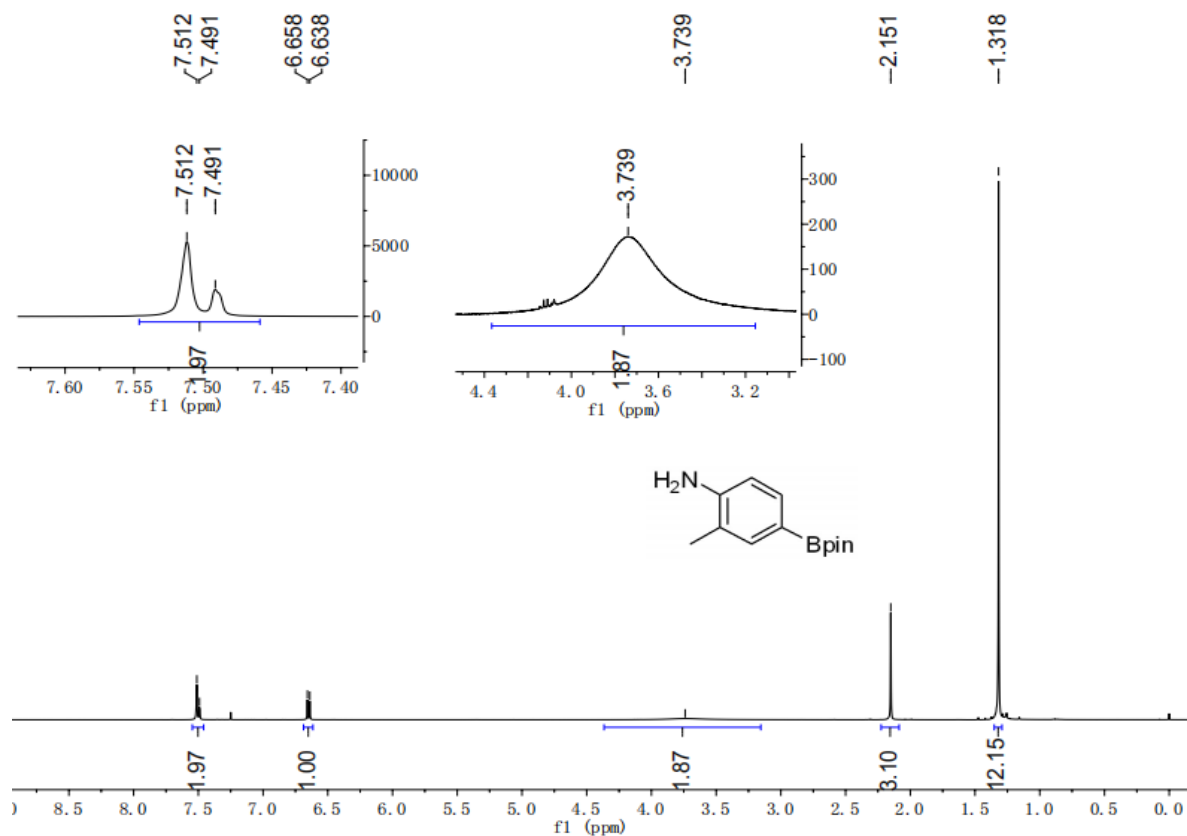

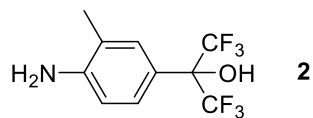

Yield: 95%; Slight pink solid; m.p.: 133.1–134.9 °C.  $^1\text{H}$  NMR (400 MHz, DMSO- $d_6$ )  $\delta$  = 8.14 (s, 1H, OH), 7.19–7.15 (m, 2H), 6.65 (d,  $J$  = 8.4 Hz, 1H), 5.18 (s, 2H, NH $_2$ ), 2.08 (s, 3H, CH $_3$ ) ppm.

**$^1\text{H}$  NMR spectrum of 2**

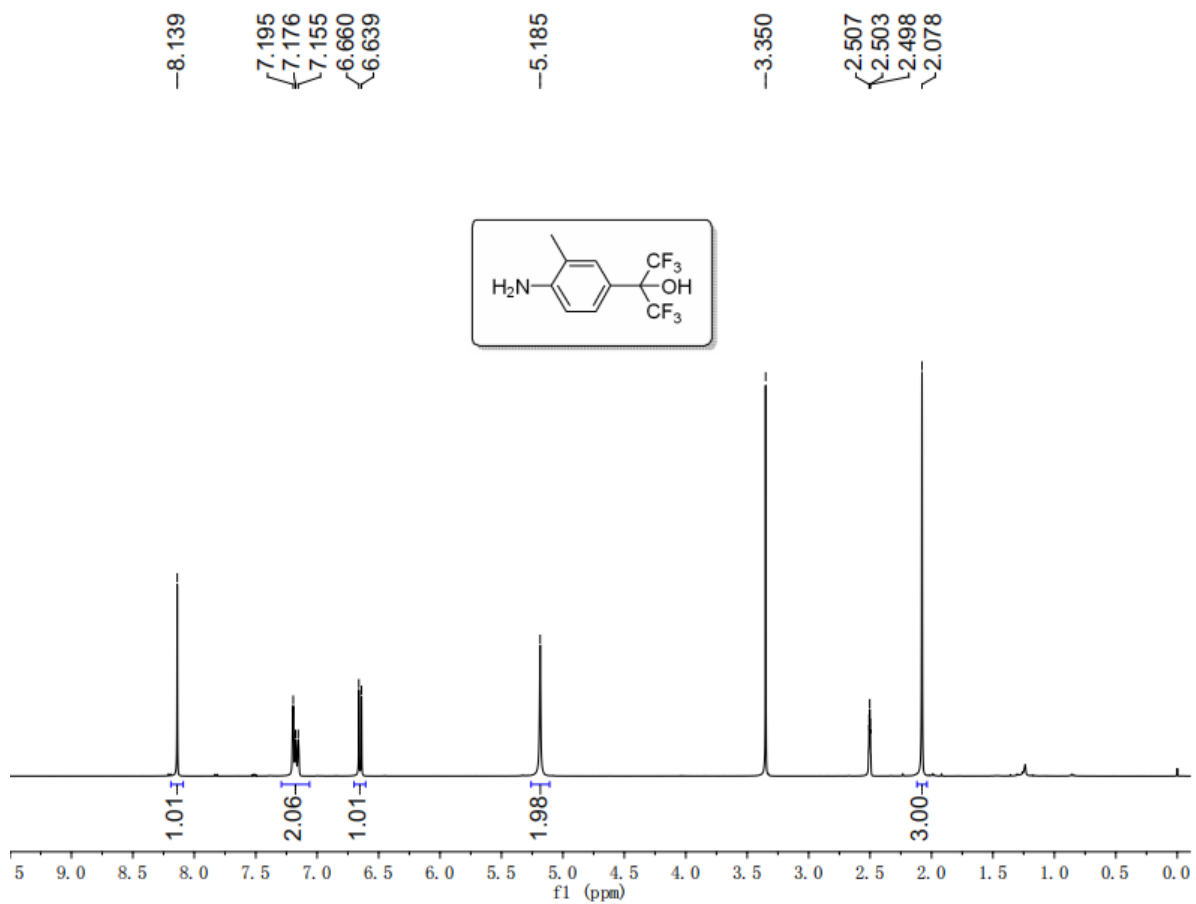

## 6. Analytical data of target compounds 8a'-c' and 8a-q

### *N*<sup>1</sup>-(4-(1,1,1,3,3,3-Hexafluoro-2-methoxypropan-2-yl)-2-methylphenyl)-3-iodo-*N*<sup>2</sup>-(2-methyl-1-(methylsulfonyl)propan-2-yl)phthalimide (8a)

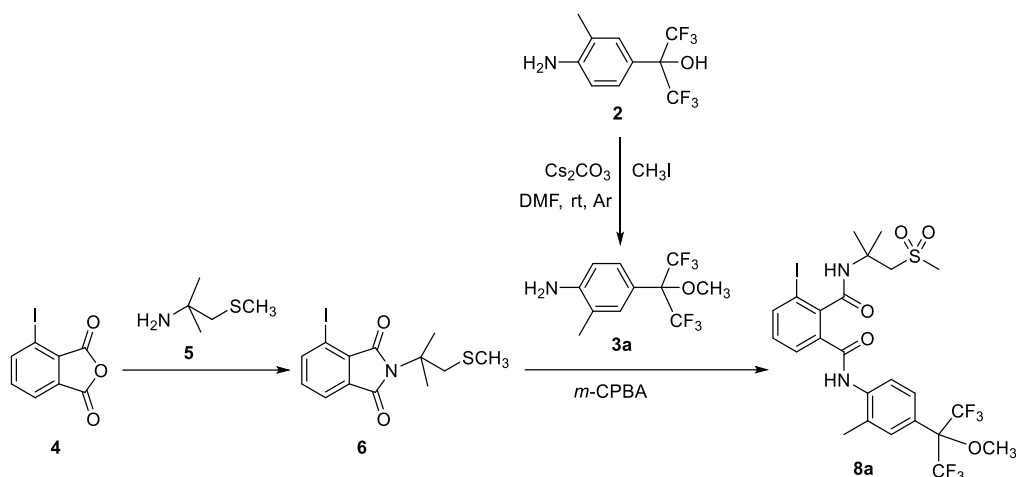

Yield: 56% (based on intermediate **4**, the same as below); White solid; m.p.: 133.1–136.7 °C. <sup>1</sup>H NMR (400 MHz, DMSO-*d*<sub>6</sub>)  $\delta$  = 9.72 (s, 1H, NH), 8.38 (s, 1H, NH), 8.01 (d, *J* = 8.0 Hz, 1H), 7.78 (d, *J* = 8.8 Hz, 1H), 7.71 (d, *J* = 7.2 Hz, 1H), 7.43–7.44 (m, 2H), 7.29–7.25 (m, 1H), 3.63 (s, 2H), 3.45 (s, 3H, OCH<sub>3</sub>), 2.92 (s, 3H), 2.34 (s, 3H), 1.52 (s, 6H) ppm; <sup>13</sup>C NMR (100 MHz, DMSO-*d*<sub>6</sub>)  $\delta$  = 167.7, 165.6, 141.2, 140.8, 138.3, 136.0, 132.5, 130.2, 129.7, 127.3, 125.8, 124.8, 123.7, 123.0, 95.3, 82.3, 60.7, 54.2, 52.4, 43.1, 26.1, 18.0 ppm; <sup>19</sup>F NMR (376 MHz, DMSO-*d*<sub>6</sub>)  $\delta$  = –70.3 (s, 6F) ppm; HRMS (ESI) calcd for C<sub>24</sub>H<sub>25</sub>F<sub>6</sub>IN<sub>2</sub>O<sub>5</sub>SNa [M+Na]<sup>+</sup> 717.0331, found 717.0330.

### *N*<sup>1</sup>-(4-(2-Ethoxy-1,1,1,3,3,3-hexafluoropropan-2-yl)-2-methylphenyl)-3-iodo-*N*<sup>2</sup>-(2-methyl-1-(methylsulfonyl)propan-2-yl)phthalimide (8b)

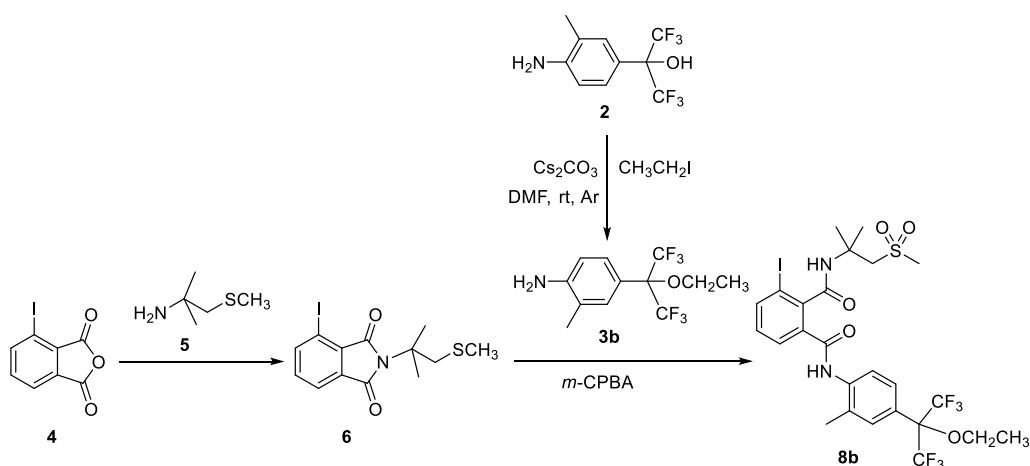

Yield: 63%; White solid; m.p.:136.7–138.9 °C. <sup>1</sup>H NMR (400 MHz, DMSO-*d*<sub>6</sub>) δ = 9.73 (s, 1H, NH), 8.43 (s, 1H, NH), 8.03 (d, *J* = 8.0 Hz, 1H), 7.84 (d, *J* = 8.0 Hz, 1H), 7.74 (d, *J* = 7.2 Hz, 1H), 7.46–7.44 (m, 2H), 7.31–7.27 (m, 1H), 3.68 (s, 2H), 3.63 (q, *J* = 6.8 Hz, 2H), 2.95 (s, 3H), 2.38 (s, 3H, CH<sub>3</sub>), 1.57 (s, 6H), 1.32 (t, *J* = 6.8 Hz, 3H) ppm; <sup>13</sup>C NMR (100 MHz, DMSO-*d*<sub>6</sub>) δ = 167.6, 165.5, 141.2, 140.7, 138.3, 136.0, 132.3, 130.1, 129.4, 127.3, 125.6, 124.7, 123.7, 123.6, 95.3, 82.1, 62.3, 60.7, 52.4, 43.0, 26.1, 18.1, 14.9 ppm; <sup>19</sup>F NMR (376 MHz, DMSO-*d*<sub>6</sub>) δ = –70.4 (s, 6F) ppm; HRMS (ESI) calcd for C<sub>25</sub>H<sub>27</sub>F<sub>6</sub>IN<sub>2</sub>O<sub>5</sub>SNa [M+Na]<sup>+</sup> 731.0487, found 731.0488.

***N*<sup>1</sup>-(4-(1,1,1,3,3,3-Hexafluoro-2-propoxypropan-2-yl)-2-methylphenyl)-3-iodo-*N*<sup>2</sup>-(2-methyl-1-(methylsulfonyl)propan-2-yl)phthalimide (8c)**

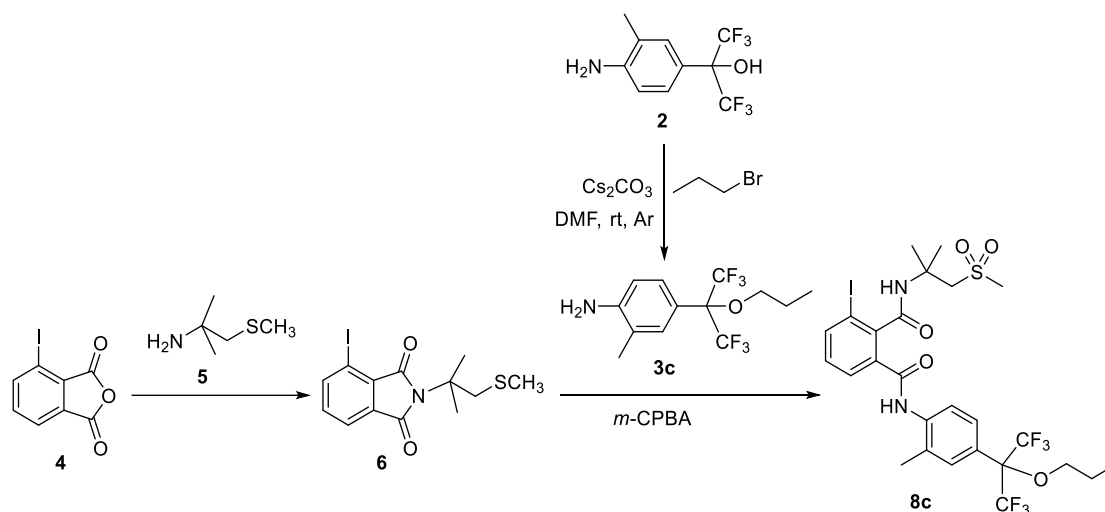

Yield: 61%; White solid; m.p.:142.1–145.0 °C. <sup>1</sup>H NMR (400 MHz, DMSO-*d*<sub>6</sub>) δ = 9.72 (s, 1H, NH), 8.41 (s, 1H, NH), 8.02 (d, *J* = 7.6 Hz, 1H), 7.81 (d, *J* = 8.0 Hz, 1H), 7.72 (d, *J* = 7.6 Hz, 1H), 7.44–7.42 (m, 2H), 7.30–7.26 (m, 1H), 3.65 (s, 2H), 3.51 (t, *J* = 6.4 Hz, 2H), 2.94 (s, 3H), 2.36 (s, 3H), 1.73–1.68 (m, 2H), 1.54 (s, 6H), 0.95 (t, *J* = 7.6 Hz, 3H) ppm; <sup>13</sup>C NMR (100 MHz, DMSO-*d*<sub>6</sub>) δ = 167.7, 165.5, 141.3, 140.7, 138.3, 136.1, 132.4, 130.1, 129.5, 127.3, 125.7, 124.8, 123.7, 123.5, 95.4, 82.1, 67.7, 60.8, 52.4, 43.1, 26.1, 22.4, 18.1, 10.0 ppm; <sup>19</sup>F NMR (376 MHz, DMSO-*d*<sub>6</sub>) δ = –70.3 (s, 6F) ppm; HRMS (ESI) calcd for C<sub>26</sub>H<sub>29</sub>F<sub>6</sub>IN<sub>2</sub>O<sub>5</sub>SNa [M+Na]<sup>+</sup> 745.0644, found 745.0643.

***N*<sup>1</sup>-(4-(2-Butoxy-1,1,1,3,3,3-hexafluoropropan-2-yl)-2-methylphenyl)-3-iodo-*N*<sup>2</sup>-(2-methyl-1-(methylsulfonyl)propan-2-yl)phthalimide (8d)**

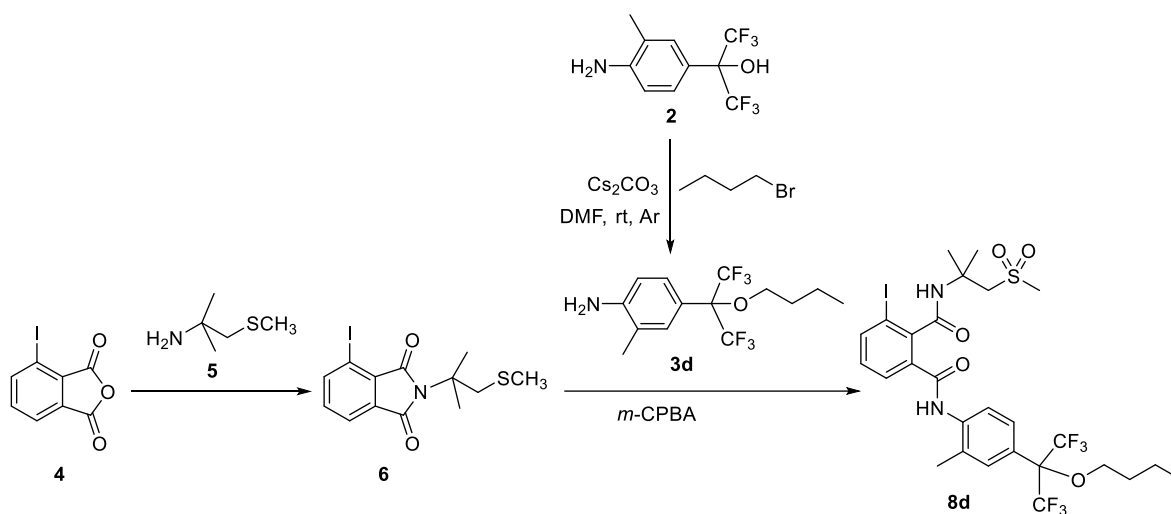

Yield: 72%; White solid; m.p.:151.1–154.4 °C.  $^1\text{H}$  NMR (400 MHz,  $\text{DMSO}-d_6$ )  $\delta$  = 9.72 (s, 1H, NH), 8.41 (s, 1H, NH), 8.02 (d,  $J$  = 8.0 Hz, 1H), 7.80 (d,  $J$  = 8.4 Hz, 1H), 7.72 (d,  $J$  = 7.6 Hz, 1H), 7.43–7.41 (m, 2H), 7.30–7.26 (m, 1H), 3.65 (s, 2H), 3.55 (t,  $J$  = 6.4 Hz, 2H), 2.94 (s, 3H), 2.35 (s, 3H), 1.70–1.66 (m, 2H), 1.54 (s, 6H), 1.44–1.38 (m, 2H), 0.91 (t,  $J$  = 7.2 Hz, 3H) ppm;  $^{13}\text{C}$  NMR (101 MHz,  $\text{DMSO}-d_6$ )  $\delta$  = 167.6, 165.5, 141.3, 140.7, 138.3, 136.0, 132.4, 130.1, 129.5, 127.3, 125.7, 124.8, 123.7, 123.5, 95.4, 82.1, 65.9, 60.7, 52.4, 43.1, 31.1, 26.1, 18.3, 18.1, 13.5 ppm;  $^{19}\text{F}$  NMR (376 MHz,  $\text{DMSO}-d_6$ )  $\delta$  = –70.3 (s, 6F) ppm; HRMS (ESI) calcd for  $\text{C}_{27}\text{H}_{31}\text{F}_6\text{IN}_2\text{O}_5\text{SNa}$  [ $\text{M}+\text{Na}$ ]<sup>+</sup> 759.0800, found 759.0798.

***N*<sup>1</sup>-(4-(1,1,1,3,3,3-Hexafluoro-2-(oxiran-2-ylmethoxy)propan-2-yl)-2-methylphenyl)-3-iodo-*N*<sup>2</sup>-(2-methyl-1-(methylsulfonyl)propan-2-yl)phthalimide (8e)**

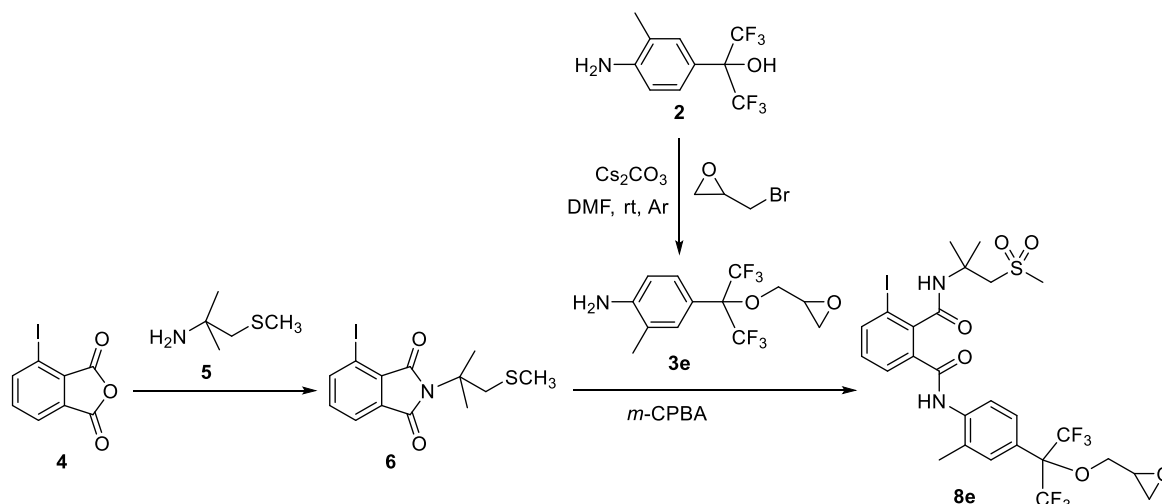

Yield: 51%; White solid; m.p.:152.8–154.4 °C.  $^1\text{H}$  NMR (400 MHz,  $\text{DMSO-}d_6$ )  $\delta$  = 9.75 (s, 1H, NH), 8.44 (s, 1H, NH), 8.03 (d,  $J$  = 7.6 Hz, 1H), 7.83 (d,  $J$  = 8.4 Hz, 1H), 7.74 (d,  $J$  = 7.6 Hz, 1H), 7.50–7.48 (m, 2H), 7.31–7.27 (m, 1H), 3.97 (d,  $J$  = 9.6 Hz, 2H), 3.67 (s, 2H), 3.43–3.39 (m, 1H), 2.96 (s, 3H), 2.84–2.69 (m, 2H), 2.38 (s, 3H), 1.56 (s, 6H) ppm;  $^{13}\text{C}$  NMR (101 MHz,  $\text{DMSO-}d_6$ )  $\delta$  = 167.7, 165.6, 141.3, 140.7, 138.5, 136.0, 132.4, 130.1, 129.7, 127.3, 125.8, 124.7, 122.8, 122.3, 95.3, 82.2, 87.8, 60.7, 52.4, 49.5, 43.4, 43.0, 26.1, 18.1 ppm;  $^{19}\text{F}$  NMR (376 MHz,  $\text{DMSO-}d_6$ )  $\delta$  = -70.3 (s, 6F) ppm; HRMS (ESI) calcd for  $\text{C}_{26}\text{H}_{27}\text{F}_6\text{N}_2\text{O}_6\text{SNa}$   $[\text{M}+\text{Na}]^+$  759.0436, found 759.0437.

***N*<sup>1</sup>-(4-(2-(Cyclopropylmethoxy)-1,1,1,3,3,3-hexafluoropropan-2-yl)-2-methylphenyl)-3-iodo-*N*<sup>2</sup>-(2-methyl-1-(methylsulfonyl)propan-2-yl)phthalimide (8f)**

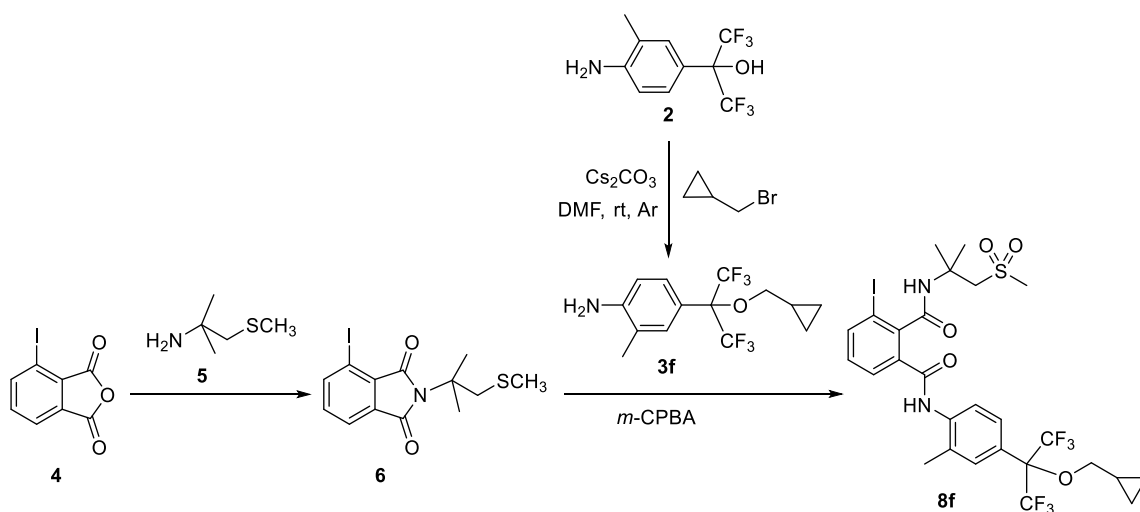

Yield: 40%; White solid; m.p.:152.2–155.1 °C.  $^1\text{H}$  NMR (400 MHz,  $\text{DMSO-}d_6$ )  $\delta$  9.72 (s, 1H, NH), 8.41 (s, 1H, NH), 8.02 (d,  $J$  = 8.0 Hz, 1H), 7.81 (d,  $J$  = 8.8 Hz, 1H), 7.72 (d,  $J$  = 7.6 Hz, 1H), 7.46–7.44 (m, 2H), 7.30–7.26 (m, 1H), 3.65 (s, 2H), 3.39 (d,  $J$  = 6.8 Hz, 2H), 2.96 (s, 3H), 2.36 (s, 3H), 1.53 (s, 6H), 1.26–1.20 (m, 1H), 0.61–0.56 (m, 2H), 0.29–0.26 (m, 2H) ppm;  $^{13}\text{C}$  NMR (100 MHz,  $\text{DMSO-}d_6$ )  $\delta$  167.7, 165.5, 141.3, 140.7, 138.3, 136.0, 132.3, 130.1, 129.5, 127.3, 125.7, 124.7, 123.7 (q,  $^1J_{\text{CF}} = 290.0$  Hz) 123.6, 95.4, 81.7, 71.1, 60.8, 52.4, 43.1, 26.1, 18.1, 10.3, 3.0 ppm;  $^{19}\text{F}$  NMR (376 MHz,  $\text{DMSO-}d_6$ )  $\delta$  = -73.9 (s, 6F) ppm; HRMS (ESI) calcd for  $\text{C}_{27}\text{H}_{29}\text{F}_6\text{N}_2\text{O}_5\text{SNa}$   $[\text{M}+\text{Na}]^+$  757.0644, found 757.0645.

***N*<sup>1</sup>-(4-(2-(Chloromethoxy)-1,1,1,3,3,3-hexafluoropropan-2-yl)-2-methylphenyl)-3-iodo-*N*<sup>2</sup>-(2-methyl-1-(methylsulfonyl)propan-2-yl)phthalimide (8g)**

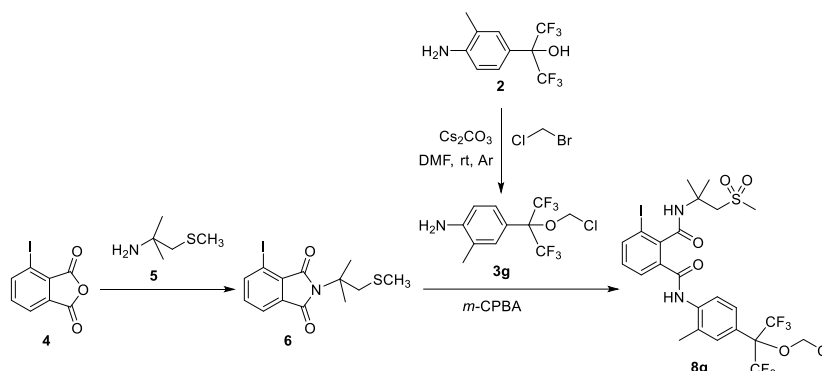

Yield: 39%; White solid; m.p.:150.7–153.6 °C. <sup>1</sup>H NMR (400 MHz, DMSO-*d*<sub>6</sub>) δ 9.76 (s, 1H, NH), 8.43 (s, 1H, NH), 8.03 (d, *J* = 8.0 Hz, 1H), 7.89 (d, *J* = 9.6 Hz, 1H), 7.73 (d, *J* = 7.6 Hz, 1H), 7.52 (s, 1H), 7.51 (d, *J* = 8.0 Hz, 1H) 7.31–7.27 (m, 1H), 5.70 (s, 2H), 3.66 (s, 2H), 2.96 (s, 3H), 2.28 (s, 3H), 1.56 (s, 6H) ppm; <sup>13</sup>C NMR (100 MHz, DMSO-*d*<sub>6</sub>) δ 167.7, 165.6, 141.2, 140.8, 139.0, 136.0, 132.5, 130.2, 129.9, 127.4, 126.0, 124.7, 123.2 (q, <sup>1</sup>*J*<sub>CF</sub> = 288.0 Hz), 121.8, 95.3, 83.5, 76.3, 60.8, 52.4, 43.1, 26.1, 18.1 ppm; <sup>19</sup>F NMR (376 MHz, DMSO-*d*<sub>6</sub>) δ = –70.3 (s, 6F) ppm; HRMS (ESI) calcd for C<sub>24</sub>H<sub>24</sub>ClF<sub>6</sub>IN<sub>2</sub>O<sub>5</sub>SNa [M+Na]<sup>+</sup> 750.9941, found 750.9942.

***N*<sup>1</sup>-(4-(2-(Cyanomethoxy)-1,1,1,3,3,3-hexafluoropropan-2-yl)-2-methylphenyl)-3-iodo-*N*<sup>2</sup>-(2-methyl-1-(methylsulfonyl)propan-2-yl)phthalimide (8h)**

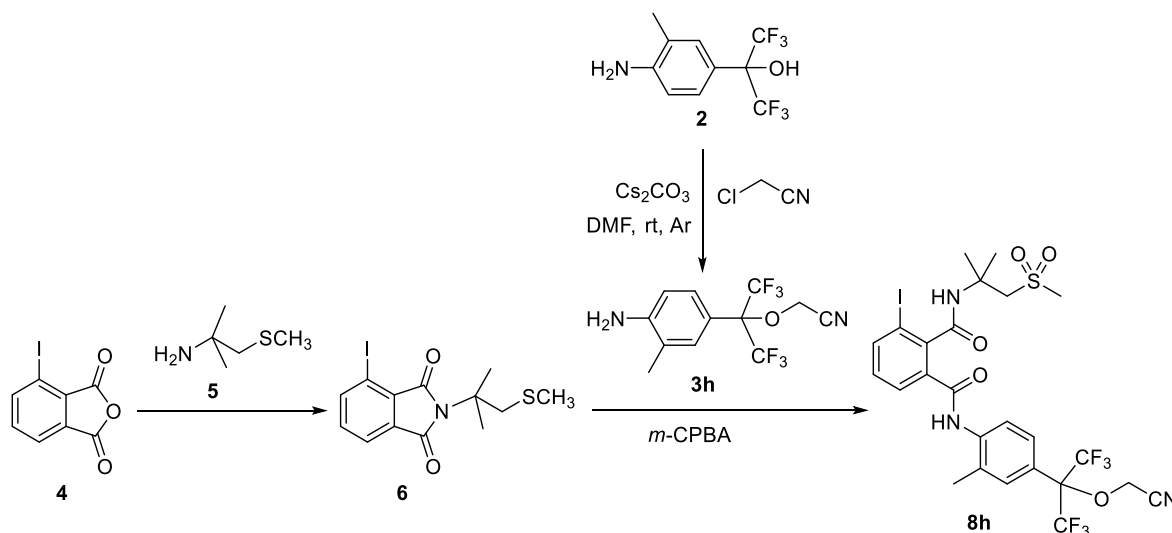

Yield: 55%; White solid; m.p.:108.5–110.9 °C. <sup>1</sup>H NMR (400 MHz, DMSO-*d*<sub>6</sub>) δ = 9.77 (s, 1H, NH), 8.42 (s, 1H, NH), 8.02 (d, *J* = 7.6 Hz, 1H), 7.86 (d, *J* = 9.2 Hz, 1H), 7.72 (d, *J* = 7.6 Hz, 1H), 7.50–7.45 (m, 2H), 7.30–7.26 (m, 1H), 4.76 (s, 2H), 3.65 (s, 2H), 2.96 (s, 3H), 2.37 (s, 3H), 1.54 (s, 6H) ppm; <sup>13</sup>C NMR (100

MHz, DMSO-*d*<sub>6</sub>)  $\delta$  = 167.6, 165.6, 141.3, 140.7, 139.1, 136.0, 132.7, 130.1, 129.7, 127.4, 125.8, 124.9, 121.4, 120.3, 115.7, 95.4, 84.1, 60.7, 53.3, 52.4, 43.1, 26.1, 18.1 ppm; <sup>19</sup>F NMR (376 MHz, DMSO-*d*<sub>6</sub>)  $\delta$  = -70.4 (s, 6F) ppm; HRMS (ESI) calcd for C<sub>25</sub>H<sub>24</sub>F<sub>6</sub>IN<sub>3</sub>O<sub>5</sub>SNa [M+Na]<sup>+</sup> 742.0283, found 742.0284.

***N*<sup>1</sup>-(4-(2-(Allyloxy)-1,1,1,3,3,3-hexafluoropropan-2-yl)-2-methylphenyl)-3-iodo-*N*<sup>2</sup>-(2-methyl-1-(methylsulfonyl)propan-2-yl)phthalimide (8i)**

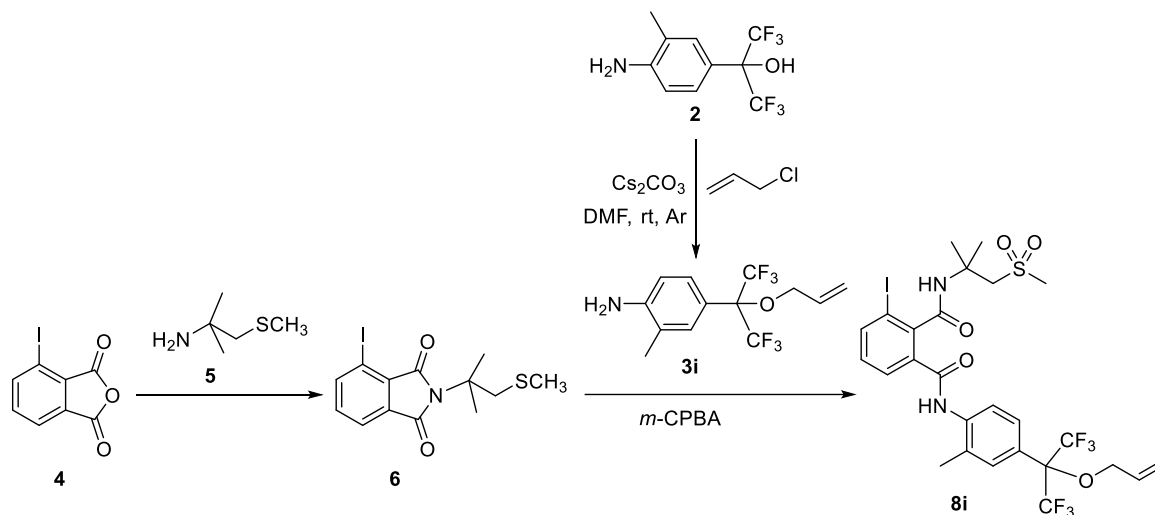

Yield: 52%; White solid; m.p.:92.1–94.8 °C. <sup>1</sup>H NMR (400 MHz, DMSO-*d*<sub>6</sub>)  $\delta$  = 9.75 (s, 1H, NH), 8.43 (s, 1H, NH), 8.02 (d, *J* = 8.0 Hz, 1H), 7.81 (d, *J* = 8.0 Hz, 1H), 7.72 (d, *J* = 6.8 Hz, 1H), 7.45–7.43 (m, 2H), 7.30–7.26 (m, 1H), 6.06–6.00 (m, 1H), 5.46–5.30 (m, 2H), 4.11 (s, 2H), 3.65 (s, 2H), 2.95 (s, 3H), 2.35 (s, 3H), 1.54 (s, 6H) ppm; <sup>13</sup>C NMR (100 MHz, DMSO-*d*<sub>6</sub>)  $\delta$  = 167.6, 165.5, 141.3, 140.7, 138.5, 136.0, 132.7, 132.4, 130.1, 129.4, 127.3, 125.6, 124.8, 123.6, 123.2, 117.8, 95.4, 82.2, 67.0, 60.7, 52.4, 43.0, 26.1, 18.1 ppm; <sup>19</sup>F NMR (376 MHz, DMSO-*d*<sub>6</sub>)  $\delta$  = -70.4 (s, 6F) ppm; HRMS (ESI) calcd for C<sub>26</sub>H<sub>27</sub>F<sub>6</sub>IN<sub>2</sub>O<sub>5</sub>SNa [M+Na]<sup>+</sup> 743.0487, found 743.0489.



***N*<sup>1</sup>-(4-(1,1,1,3,3,3-Hexafluoro-2-((2-methylallyl)oxy)propan-2-yl)-2-methylphenyl)-3-iodo-*N*<sup>2</sup>-(2-methyl-1-(methylsulfonyl)propan-2-yl)phthalimide (8j)**

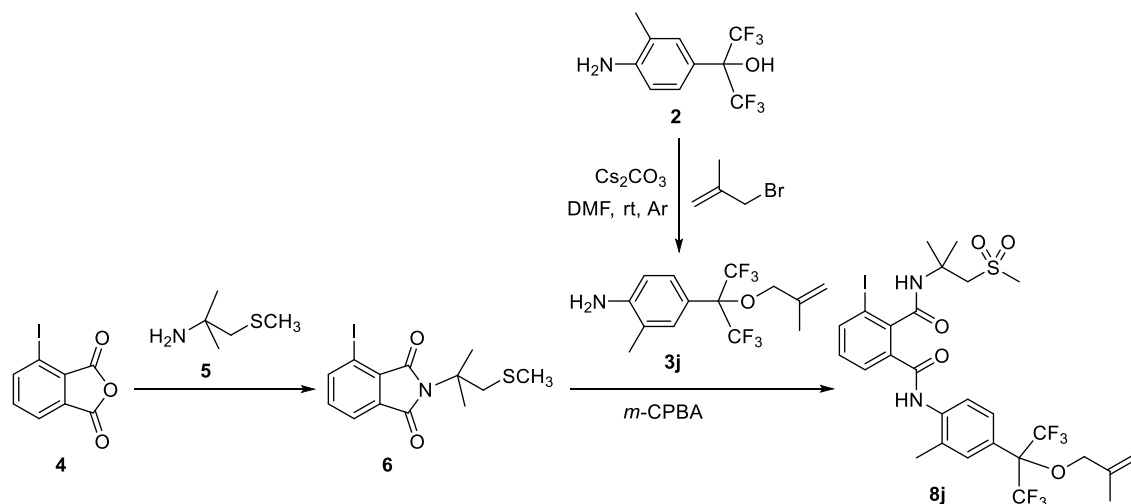

Yield: 54%; White solid; m.p.:104.1–106.3°C. <sup>1</sup>H NMR (400 MHz, DMSO-*d*<sub>6</sub>) δ = 9.73 (s, 1H, NH), 8.41 (s, 1H, NH), 8.02 (d, *J* = 8.0 Hz, 1H), 7.81 (d, *J* = 9.2 Hz, 1H), 7.71 (d, *J* = 7.6 Hz, 1H), 7.45–7.43 (m, 2H), 7.30–7.26 (m, 1H), 5.12–5.02 (m, 2H), 4.00 (s, 2H), 3.65 (s, 2H), 2.94 (s, 3H), 2.34 (s, 3H), 1.76 (s, 3H), 1.54 (s, 6H) ppm; <sup>13</sup>C NMR (100 MHz, DMSO-*d*<sub>6</sub>) δ = 167.7, 165.6, 141.3, 140.7, 140.0, 138.5, 136.0, 132.4, 130.1, 129.4, 127.3, 125.6, 124.8, 123.6, 123.2, 112.2, 95.4, 82.9, 69.1, 60.8, 52.4, 43.1, 26.1, 19.0, 18.1 ppm; <sup>19</sup>F NMR (376 MHz, DMSO-*d*<sub>6</sub>) δ = –70.4 (s, 6F) ppm; HRMS (ESI) calcd for C<sub>27</sub>H<sub>28</sub>F<sub>6</sub>IN<sub>2</sub>O<sub>5</sub>S [M–H]<sup>–</sup> 733.0668, found 733.0667.

***N*<sup>1</sup>-(4-(1,1,1,3,3,3-Hexafluoro-2-((3,3,3-trifluoroprop-1-en-2-yl)oxy)propan-2-yl)-2-methylphenyl)-3-iodo-*N*<sup>2</sup>-(2-methyl-1-(methylsulfonyl)propan-2-yl)phthalimide (8k)**

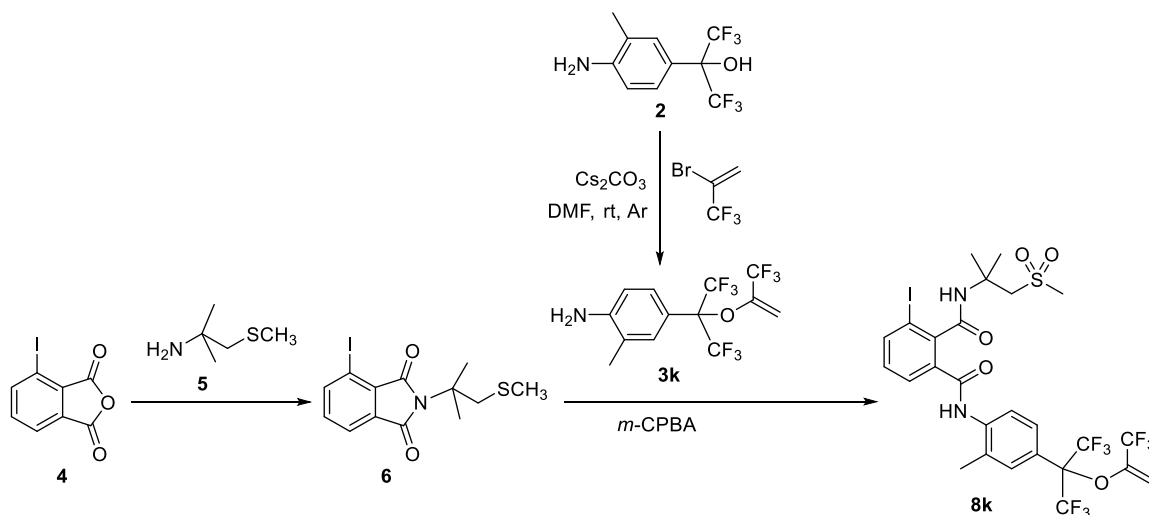

Yield: 38%; White solid; m.p.:142.1–144.2 °C. <sup>1</sup>H NMR (400 MHz, DMSO-*d*<sub>6</sub>) δ 9.81 (s, 1H, NH), 8.44 (s, 1H, NH), 8.04 (d, *J* = 7.6 Hz, 1H), 7.94 (d, *J* = 8.4 Hz, 1H) 7.74 (d, *J* = 7.6 Hz, 1H), 7.45 (d, *J* = 8.4 Hz, 1H) 7.43 (s, 1H), 7.32–7.28 (m, 1H), 6.75 (d, *J* = 6.8 Hz, 1H), 5.53–5.45 (m, 1H), 3.68 (s, 2H), 2.97 (s, 3H), 2.40 (s, 3H), 1.57 (s, 6H) ppm; <sup>13</sup>C NMR (100 MHz, DMSO-*d*<sub>6</sub>) δ 167.6, 165.6, 146.7, 141.3, 140.8, 139.2, 136.0, 132.7, 130.1, 129.6, 127.4, 125.8, 124.9, 123.9, 121.5, 121.2, 100.5, 95.3, 83.1, 60.8, 52.4, 43.1, 26.1, 18.1 ppm; <sup>19</sup>F NMR (376 MHz, DMSO-*d*<sub>6</sub>) δ –57.1 (d, *J* = 7.6 Hz, 3F), –71.3 (s, 6F) ppm; HRMS (ESI) calcd for C<sub>26</sub>H<sub>24</sub>F<sub>9</sub>IN<sub>2</sub>O<sub>5</sub>SNa [M+Na]<sup>+</sup> 797.0205, found 797.0204.

***N*<sup>1</sup>-(4-(1,1,1,3,3,3-Hexafluoro-2-(prop-2-yn-1-yloxy)propan-2-yl)-2-methylphenyl)-3-iodo-*N*<sup>2</sup>-(2-methyl-1-(methylsulfonyl)propan-2-yl)phthalimide (8I)**

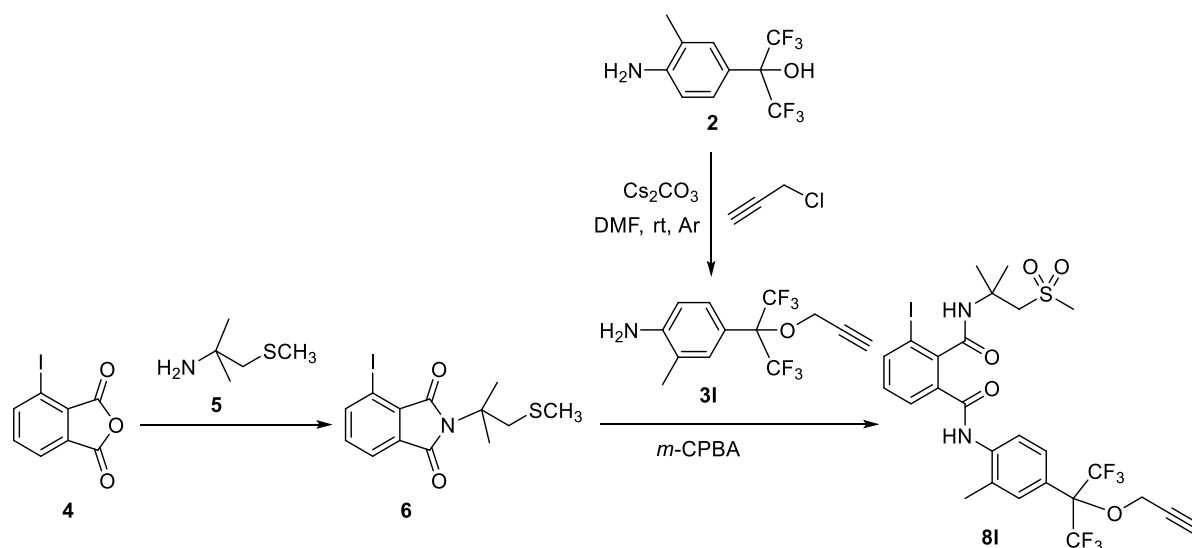

Yield: 49%; White solid; m.p.:164.7–167.6 °C. <sup>1</sup>H NMR (400 MHz, DMSO-*d*<sub>6</sub>) δ = 9.77 (s, 1H, NH), 8.45 (s, 1H, NH), 8.03 (d, *J* = 8.0 Hz, 1H), 7.87 (d, *J* = 8.8 Hz, 1H), 7.74 (d, *J* = 7.6 Hz, 1H), 7.49–7.47 (m, 2H), 7.31–7.28 (m, 1H), 4.35 (s, 2H), 3.71 (s, 1H), 3.68 (s, 2H), 2.96 (s, 3H), 2.50 (s, 3H), 1.57 (s, 6H) ppm; <sup>13</sup>C NMR (100 MHz, DMSO-*d*<sub>6</sub>) δ = 167.7, 165.6, 141.3, 140.7, 138.7, 136.0, 132.5, 130.2, 129.7, 127.3, 125.7, 124.8, 122.6, 122.0, 95.3, 82.5, 78.7, 77.9, 60.7, 55.3, 52.4, 43.1, 26.1, 18.1 ppm; <sup>19</sup>F NMR (376 MHz, DMSO-*d*<sub>6</sub>) δ = –70.4 (s, 6F) ppm; HRMS (ESI) calcd for C<sub>26</sub>H<sub>25</sub>F<sub>6</sub>IN<sub>2</sub>O<sub>5</sub>SNa [M+Na]<sup>+</sup> 741.0331, found 741.0333.

***N*<sup>1</sup>-(4-(2-(But-2-yn-1-yloxy)-1,1,1,3,3,3-hexafluoropropan-2-yl)-2-methylphenyl)-3-iodo-*N*<sup>2</sup>-(2-methyl-1-(methylsulfonyl)propan-2-yl)phthalimide (8m)**

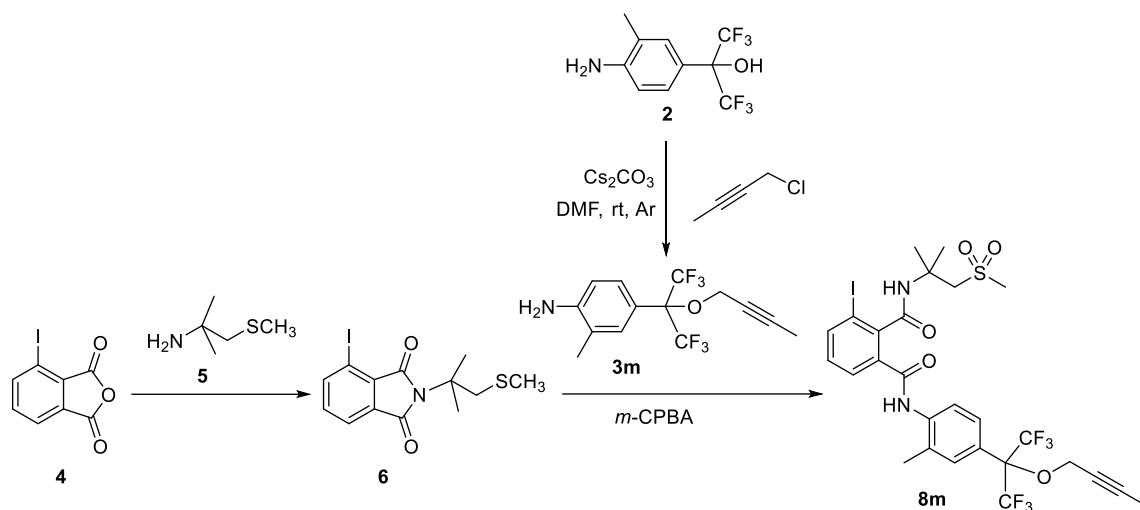

Yield: 49%; White solid; m.p.:170.5–174.3°C. <sup>1</sup>H NMR (400 MHz, DMSO-*d*<sub>6</sub>) δ 9.75 (s, 1H, NH), 8.42 (s, 1H, NH), 8.03 (d, *J* = 7.6 Hz, 1H), 7.83 (d, *J* = 8.4 Hz, 1H), 7.73 (d, *J* = 7.2 Hz, 1H), 7.46 (s, 1H), 7.45 (d, *J* = 8.0 Hz, 1H), 7.31–7.27 (m, 1H), 4.28 (s, 2H), 3.66 (s, 2H), 2.95 (s, 3H), 2.37 (s, 3H), 1.91 (s, 3H), 1.55 (s, 6H) ppm; <sup>13</sup>C NMR (100 MHz, DMSO-*d*<sub>6</sub>) δ 167.7, 165.6, 141.3, 140.7, 138.6, 136.0, 132.5, 130.1, 129.6, 127.3, 125.7, 124.8, 123.5 (q, <sup>1</sup>*J*<sub>CF</sub> = 288.0 Hz), 122.7, 95.4, 84.4, 82.3, 73.5, 60.8, 55.8, 52.4, 43.1, 26.1, 18.1, 3.1 ppm; <sup>19</sup>F NMR (376 MHz, DMSO-*d*<sub>6</sub>) δ = -70.3 (s, 6F) ppm; HRMS (ESI) calcd for C<sub>27</sub>H<sub>27</sub>F<sub>6</sub>IN<sub>2</sub>O<sub>5</sub>SNa [M+Na]<sup>+</sup> 755.0487, found 755.0488.

***N*<sup>1</sup>-(4-(2-(2-Amino-2-oxoethoxy)-1,1,1,3,3,3-hexafluoropropan-2-yl)-2-methylphenyl)-3-iodo-*N*<sup>2</sup>-(2-methyl-1-(methylsulfonyl)propan-2-yl)phthalimide (8n)**

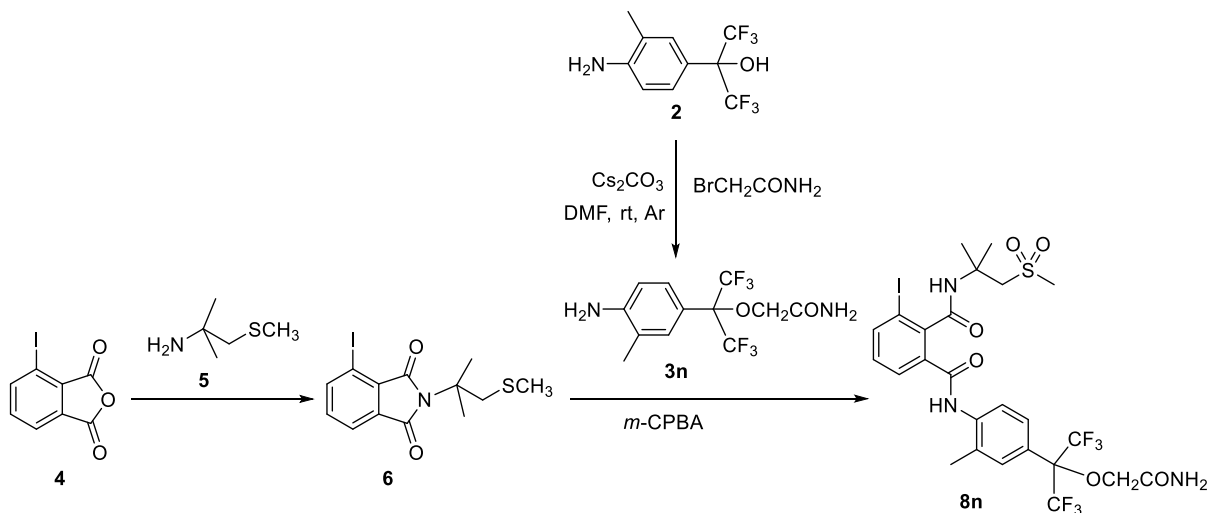

Yield: 44%; White solid; m.p.:174.2–176.3°C. <sup>1</sup>H NMR (400 MHz, DMSO-*d*<sub>6</sub>) δ 9.75 (s, 1H, NH), 8.41 (s, 1H, NH), 8.02 (d, *J* = 8.0 Hz, 1H), 7.80 (d, *J* = 8.4 Hz, 1H), 7.72 (d, *J* = 7.6 Hz, 1H), 7.53–7.50 (m, 2H), 7.43 (d, *J* = 9.2 Hz, 2H), 7.30–7.26 (m, 1H), 4.00 (s, 2H), 3.66 (s, 2H), 2.95 (s, 3H), 2.35 (s, 3H), 1.55 (s, 6H) ppm; <sup>13</sup>C NMR (100 MHz, DMSO-*d*<sub>6</sub>) δ 168.0, 167.7, 165.6, 141.3, 140.7, 138.6, 136.0, 132.6, 130.1, 129.8, 127.3, 125.8, 124.8, 123.5, 122.8, 95.4, 82.3, 64.7, 60.7, 52.4, 43.0, 26.1, 18.1 ppm; <sup>19</sup>F NMR (376 MHz, DMSO-*d*<sub>6</sub>) δ = -70.4 (s, 6F) ppm; HRMS (ESI) calcd for C<sub>25</sub>H<sub>26</sub>F<sub>6</sub>IN<sub>3</sub>O<sub>6</sub>SNa [M+Na]<sup>+</sup> 760.0388, found 760.0389.

**Ethyl-2-((1,1,1,3,3,3-hexafluoro-2-(4-(3-iodo-2-((2-methyl-1-(methylsulfonyl)propan-2-yl)-carbamoyl)benzamido)-3-methylphenyl)propan-2-yl)oxy)acetate (8o)**

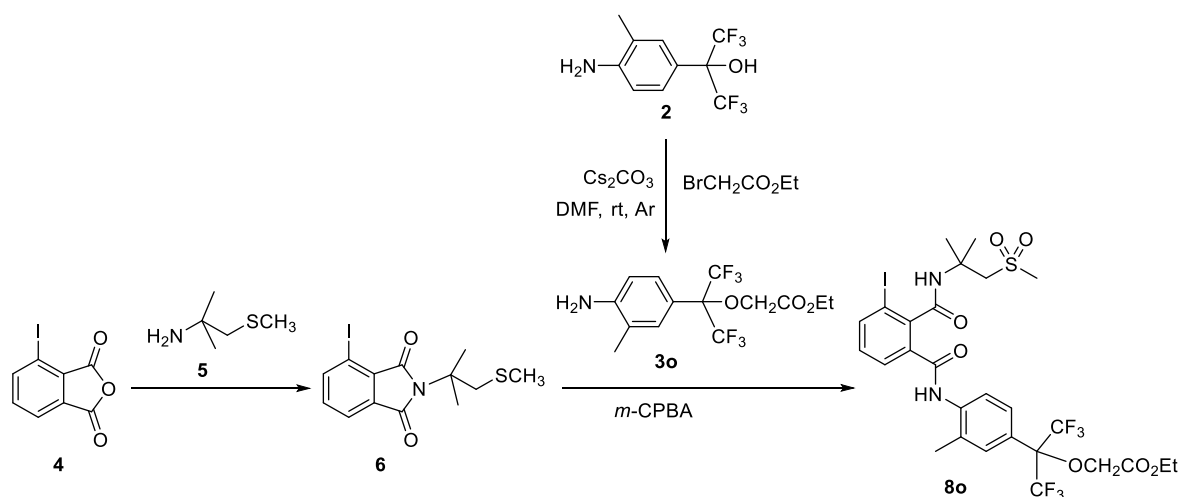

Yield: 67%; White solid; m.p.:110.7–112.2 °C. <sup>1</sup>H NMR (400 MHz, DMSO-*d*<sub>6</sub>) δ = 9.76 (s, 1H, NH), 8.44 (s, 1H, NH), 8.03 (d, *J* = 8.4 Hz, 1H), 7.85 (d, *J* = 8.4 Hz, 1H), 7.73 (d, *J* = 8.0 Hz, 1H), 7.50 – 7.48 (m, 2H), 7.31–7.27 (m, 1H), 4.26 (s, 2H), 4.21 (q, *J* = 7.2 Hz, 2H), 3.67 (s, 2H), 2.96 (s, 3H), 2.36 (s, 3H), 1.57 (s, 6H), 1.24 (t, *J* = 7.2 Hz, 3H) ppm; <sup>13</sup>C NMR (100 MHz, DMSO-*d*<sub>6</sub>) δ = 167.6, 167.1, 165.6, 141.3, 140.7, 138.7, 136.0, 132.5, 130.1, 129.7, 127.3, 125.7, 124.7, 122.5, 121.0, 95.3, 82.2, 83.7, 61.0, 60.7, 52.4, 43.1, 26.1, 18.1, 13.9 ppm; <sup>19</sup>F NMR (376 MHz, DMSO-*d*<sub>6</sub>) δ = -70.6 (s, 6F); HRMS (ESI) calcd for C<sub>27</sub>H<sub>29</sub>F<sub>6</sub>IN<sub>2</sub>O<sub>7</sub>SNa [M+Na]<sup>+</sup> 789.0542, found 789.0541.

***N*<sup>1</sup>-(4-(1,1,1,3,3,3-Hexafluoro-2-((4-methylbenzyl)oxy)propan-2-yl)-2-methylphenyl)-3-iodo-*N*<sup>2</sup>-(2-methyl-1-(methylsulfonyl)propan-2-yl)phthalimide (8p)**

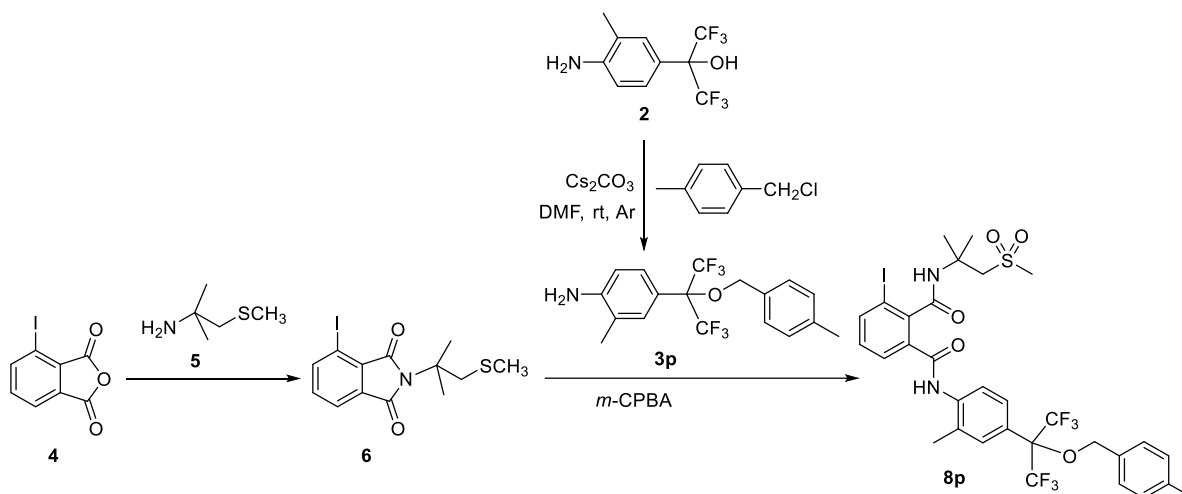

Yield: 40 %; White solid; m.p.:173.8–175.2°C. <sup>1</sup>H NMR (400 MHz, DMSO-*d*<sub>6</sub>) δ = 9.78 (s, 1H, NH), 8.45 (s, 1H, NH), 8.03 (d, *J* = 7.2 Hz, 1H), 7.87 (d, *J* = 8.4 Hz, 1H), 7.74 (d, *J* = 7.6 Hz, 1H), 7.51–7.48 (m, 2H), 7.33 (d, *J* = 8.0 Hz, 2H), 7.31–7.27 (m, 1H), 7.25 (d, *J* = 8.0 Hz, 2H), 4.59 (s, 2H), 3.68 (s, 2H), 2.95 (s, 3H), 2.37 (s, 3H), 2.34 (s, 3H), 1.56 (s, 6H) ppm; <sup>13</sup>C NMR (100 MHz, DMSO-*d*<sub>6</sub>) δ = 167.7, 165.6, 141.3, 140.7, 138.5, 137.7, 136.1, 132.7, 132.4, 130.1, 129.7, 129.1, 127.8, 127.3, 125.8, 124.8, 123.7, 123.2, 95.4, 82.3, 67.8, 60.7, 52.4, 43.0, 26.1, 20.7, 18.2 ppm; <sup>19</sup>F NMR (376 MHz, DMSO-*d*<sub>6</sub>) δ = –70.1 (s, 6F) ppm; HRMS (ESI) calcd for C<sub>31</sub>H<sub>31</sub>F<sub>6</sub>IN<sub>2</sub>O<sub>5</sub>SNa [M+Na]<sup>+</sup> 807.0800, found 807.0797.

***N*<sup>1</sup>-(4-(2-((3-Cyanobenzyl)oxy)-1,1,1,3,3,3-hexafluoropropan-2-yl)-2-methylphenyl)-3-iodo-*N*<sup>2</sup>-(2-methyl-1-(methylsulfonyl)propan-2-yl)phthalimide (8q)**

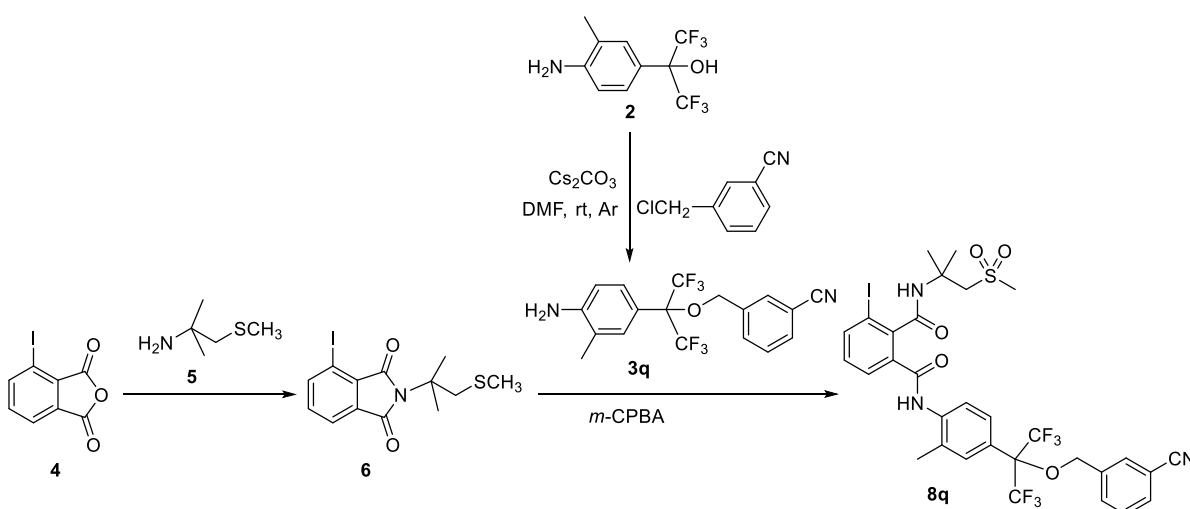

Yield: 48%; White solid; m.p.: 170.1–173.4 °C. <sup>1</sup>H NMR (400 MHz, DMSO-*d*<sub>6</sub>) δ = 9.76 (s, 1H, NH), 8.43 (s, 1H, NH), 8.03 (d, *J* = 7.2 Hz, 1H), 7.89 (s, 1H), 7.86 (d, *J* = 7.6 Hz, 2H), 7.81 (d, *J* = 8.0 Hz, 1H), 7.73 (d, *J* = 7.6 Hz, 1H), 7.69–7.65 (m, 1H), 7.51 (d, *J* = 8.8 Hz, 1H), 7.47 (s, 1H), 7.31–7.27 (m, 1H), 4.74 (s, 2H), 3.66 (s, 2H), 2.95 (s, 3H), 2.36 (s, 3H), 1.55 (s, 6H) ppm; <sup>13</sup>C NMR (101 MHz, DMSO-*d*<sub>6</sub>) δ = 167.7, 165.6, 141.3, 140.7, 138.6, 137.5, 136.0, 132.5, 132.1, 132.0, 130.8, 130.1, 130.0, 129.6, 127.3, 125.8, 124.8, 122.7, 120.7, 118.5, 111.6, 95.3, 82.5, 66.7, 60.7, 52.4, 43.1, 26.1, 18.1 ppm; <sup>19</sup>F NMR (376 MHz, DMSO-*d*<sub>6</sub>) δ = –70.1 (s, 6F) ppm; HRMS (ESI) calcd for C<sub>31</sub>H<sub>28</sub>F<sub>6</sub>IN<sub>3</sub>O<sub>5</sub>SNa [M+Na]<sup>+</sup> 818.0596, found 818.0594.

**3-Iodo-*N*<sup>2</sup>-(2-methyl-1-(methylsulfonyl)propan-2-yl)-*N*<sup>1</sup>-(3',4',5'-trifluoro-3-methyl-[1,1'-biphenyl]-4-yl)phthalimide (8a')**

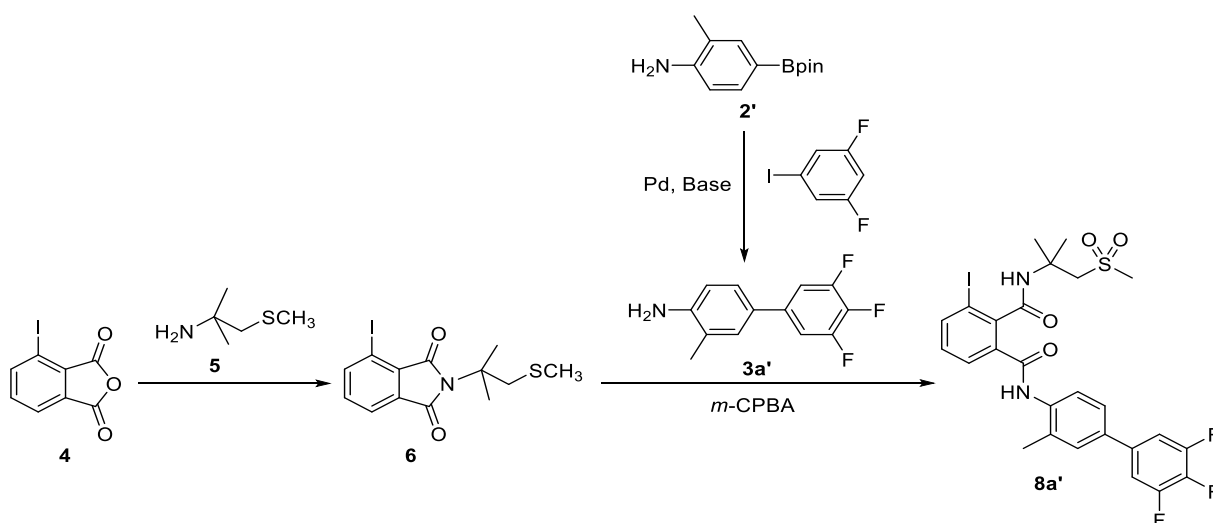

Yield: 48%; White solid; m.p.: 187.1–189.9 °C. <sup>1</sup>H NMR (400 MHz, DMSO-*d*<sub>6</sub>) δ 9.67 (s, 1H, NH), 8.42 (s, 1H, NH), 8.01 (d, *J* = 8.0 Hz, 1H), 7.71–7.65 (m, 5H), 7.59 (d, *J* = 8.4 Hz, 1H), 7.30–7.26 (m, 1H), 3.67 (s, 2H), 2.98 (s, 3H), 2.35 (s, 3H), 1.55 (s, 6H) ppm; <sup>13</sup>C NMR (100 MHz, DMSO-*d*<sub>6</sub>) δ 167.7, 165.4, 151.7 (m), 149.4 (m), 141.3, 140.6, 136.6, 136.3, 133.6, 132.4, 130.1, 128.8, 127.3, 124.9, 124.4, 111.0, 110.8, 95.4, 60.9, 52.4, 43.1, 26.2, 17.9 ppm; <sup>19</sup>F NMR (376 MHz, DMSO-*d*<sub>6</sub>) δ = –134.9 – –135.0 (m, 2F), –163.8 – –163.9 (m, 1F) ppm; HRMS (ESI) calcd for C<sub>26</sub>H<sub>24</sub>F<sub>3</sub>IN<sub>2</sub>O<sub>4</sub>SNa [M+Na]<sup>+</sup> 667.0351, found 667.0354.

**3-Iodo-*N*<sup>2</sup>-(2-methyl-1-(methylsulfonyl)propan-2-yl)-*N*<sup>1</sup>-(2-methyl-4-(3,3,3-trifluoroprop-1-en-2-yl)phenyl)phthalimide (8b')**

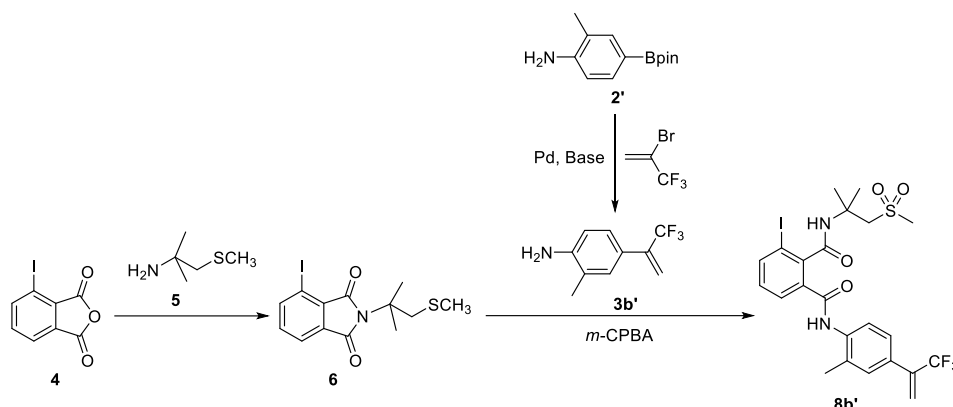

Yield: 33%; White solid; m.p.: 164.0–168.2 °C. <sup>1</sup>H NMR (400 MHz, DMSO-*d*<sub>6</sub>) δ 9.66 (s, 1H, NH), 8.38 (s, 1H, NH), 8.01 (d, *J* = 7.6 Hz, 1H), 7.71 (d, *J* = 7.2 Hz, 1H) 7.62 (d, *J* = 8.4 Hz, 1H), 7.39 (s, 1H), 7.35 (d, *J* = 8.0 Hz, 1H), 7.29–7.25 (m, 1H), 6.09–6.05 (m, 2H), 3.64 (s, 2H), 2.96 (s, 3H), 2.30 (s, 3H), 1.53 (s, 6H) ppm; <sup>13</sup>C NMR (100 MHz, DMSO-*d*<sub>6</sub>) δ 167.7, 165.4, 141.3, 140.6, 137.1, 136.6, 136.3, 136.2, 132.3, 130.1, 129.5, 129.0, 127.3, 124.8, 124.7, 121.6, 95.4, 60.8, 52.4, 43.1, 26.1, 17.9 ppm; <sup>19</sup>F NMR (376 MHz, DMSO-*d*<sub>6</sub>) δ –63.2 (s, 3F) ppm; HRMS (ESI) calcd for C<sub>23</sub>H<sub>24</sub>F<sub>3</sub>IN<sub>2</sub>O<sub>4</sub>SNa [M+Na]<sup>+</sup> 631.0351, found 631.0350.

**3-Iodo-*N*<sup>2</sup>-(2-methyl-1-(methylsulfonyl)propan-2-yl)-*N*<sup>1</sup>-(2-methyl-4-((3,3,3-trifluoroprop-1-en-2-yl)oxy)phenyl)phthalimide (8c')**

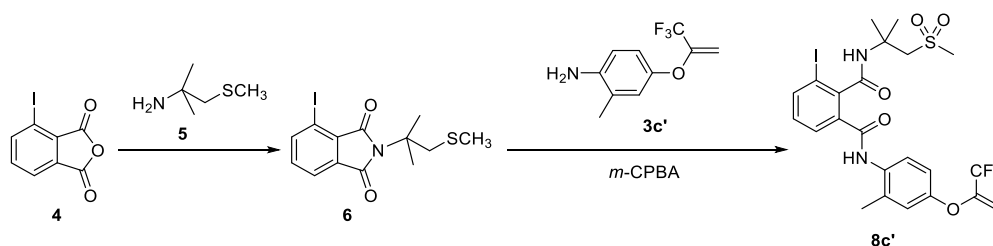

Yield: 39%; White solid; m.p.: 165.5–167.3 °C. <sup>1</sup>H NMR (400 MHz, DMSO-*d*<sub>6</sub>) δ 9.66 (s, 1H, NH), 8.41 (s, 1H, NH), 8.02 (d, *J* = 8.0 Hz, 1H), 7.75 (d, *J* = 7.6 Hz, 1H), 7.52 (d, *J* = 8.4 Hz, 1H), 7.30–7.25 (m, 2H), 7.12 (s, 1H), 7.08–7.05 (m, 1H), 5.40–5.32 (m, 1H) 3.71 (s, 2H), 3.02 (s, 3H), 2.31 (s, 3H), 1.59 (s, 6H) ppm; <sup>13</sup>C NMR (100 MHz, DMSO-*d*<sub>6</sub>) δ 167.7, 165.4, 153.4, 150.7, 141.4, 140.6, 136.2, 135.0, 132.6, 130.1, 127.3, 126.7, 122.7 (q, <sup>1</sup>*J*<sub>CF</sub> = 267.6 Hz), 118.5, 114.3, 97.6 (q, <sup>2</sup>*J*<sub>CF</sub> = 33.7 Hz), 95.4, 60.9, 52.4, 43.2, 26.2, 17.9 ppm; <sup>19</sup>F NMR (376 MHz, DMSO-*d*<sub>6</sub>) δ –55.9 (d, *J* = 8.3 Hz, 3F) ppm; HRMS (ESI) calcd for C<sub>23</sub>H<sub>24</sub>F<sub>3</sub>IN<sub>2</sub>O<sub>5</sub>SNa [M+Na]<sup>+</sup> 647.0300, found 647.0302.

## 7. $^1\text{H}$ , $^{13}\text{C}$ , $^{19}\text{F}$ NMR and HRMS (ESI) spectra of target compounds

### $^1\text{H}$ NMR spectrum of **8a**

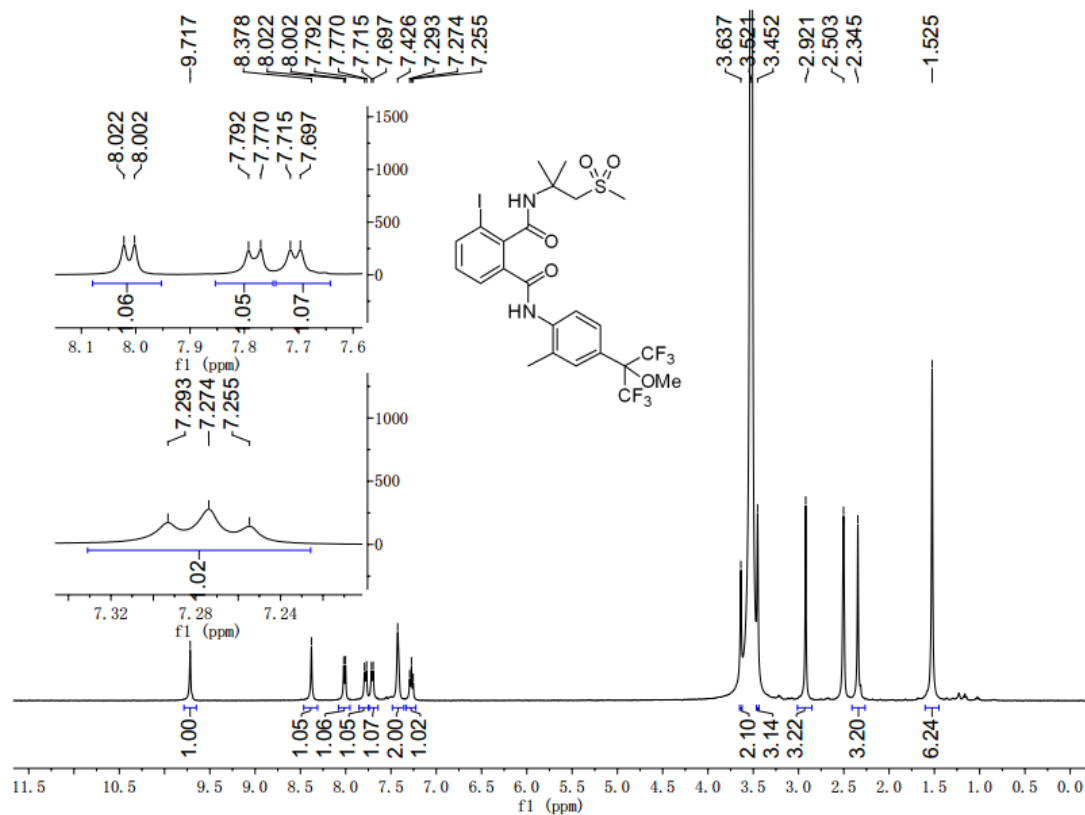

### $^{13}\text{C}$ NMR spectrum of **8a**

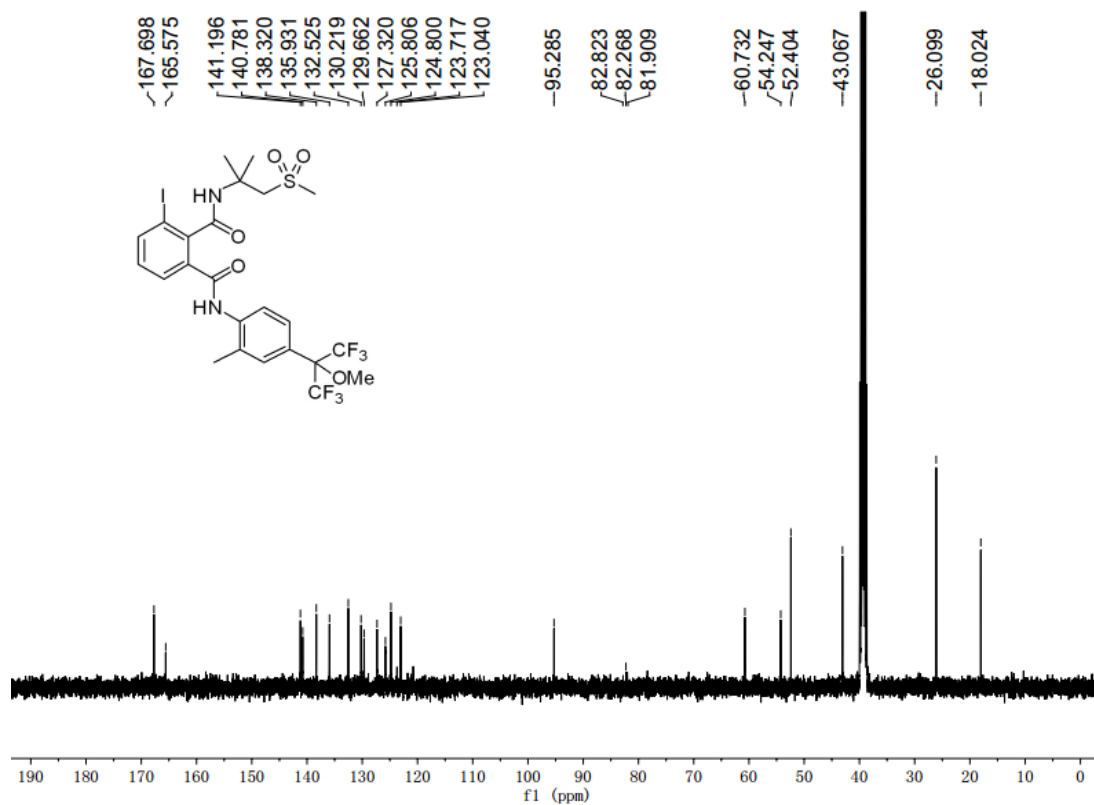



### <sup>19</sup>F NMR spectrum of 8a

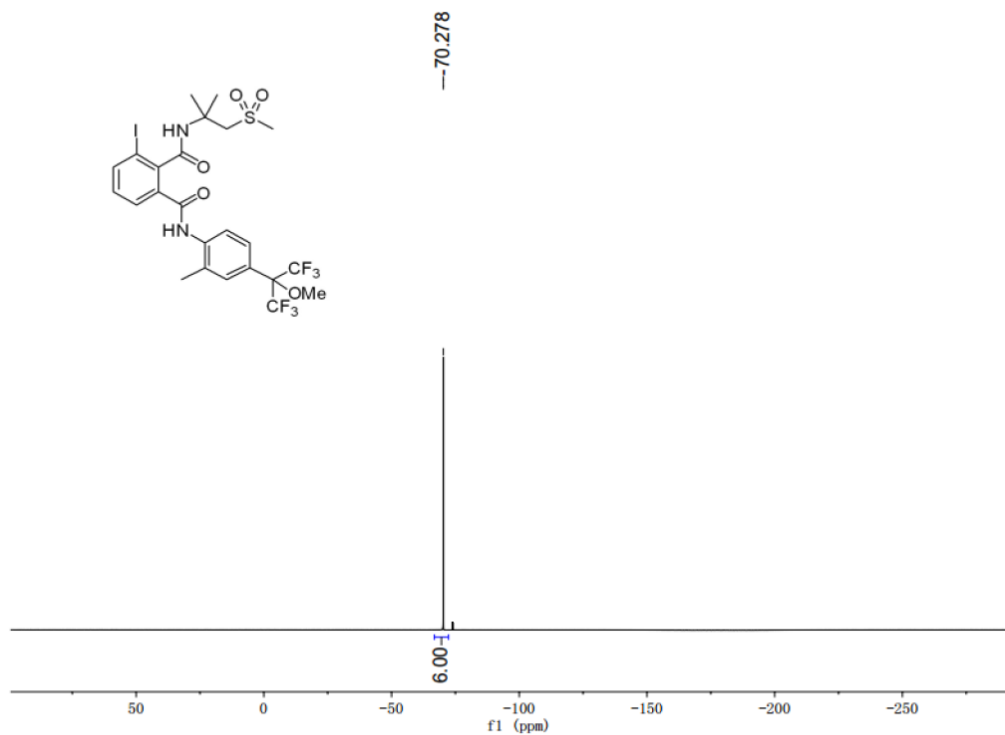

### HRMS (ESI) of 8a

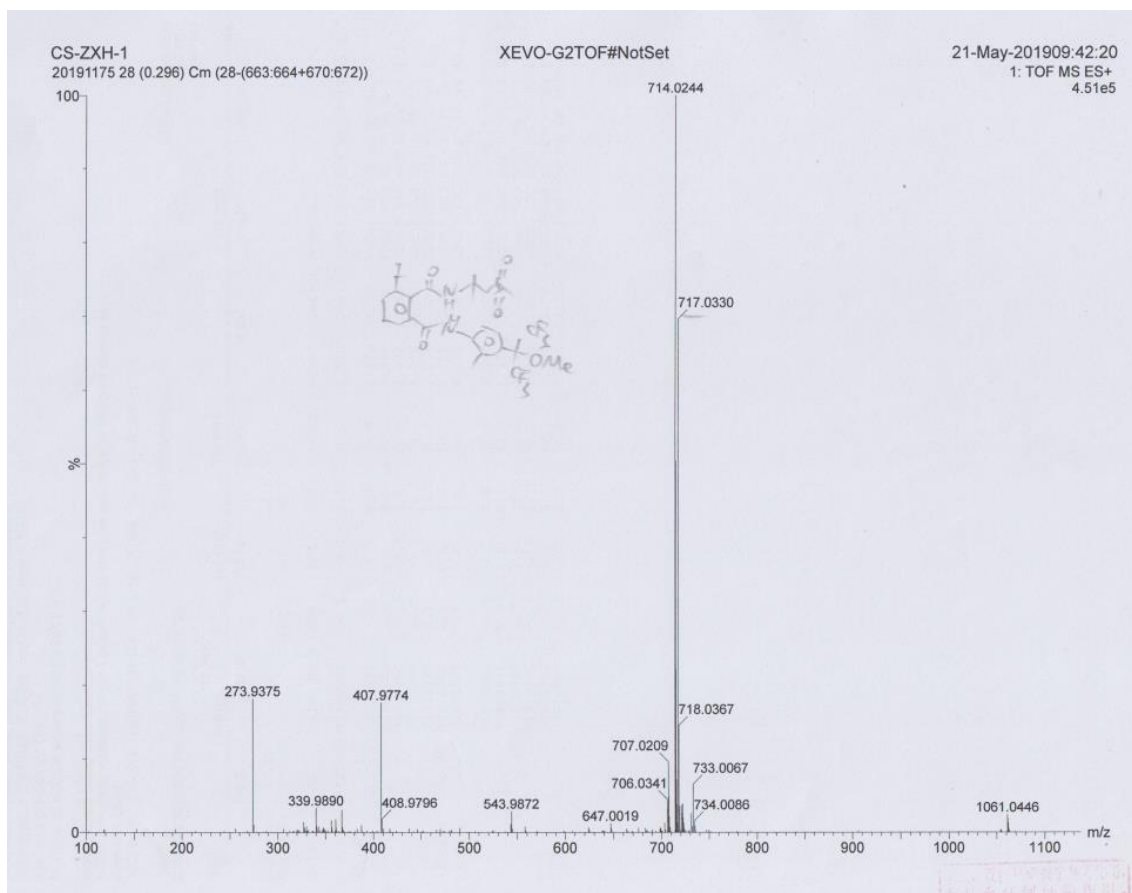

### <sup>1</sup>H NMR spectrum of 8b

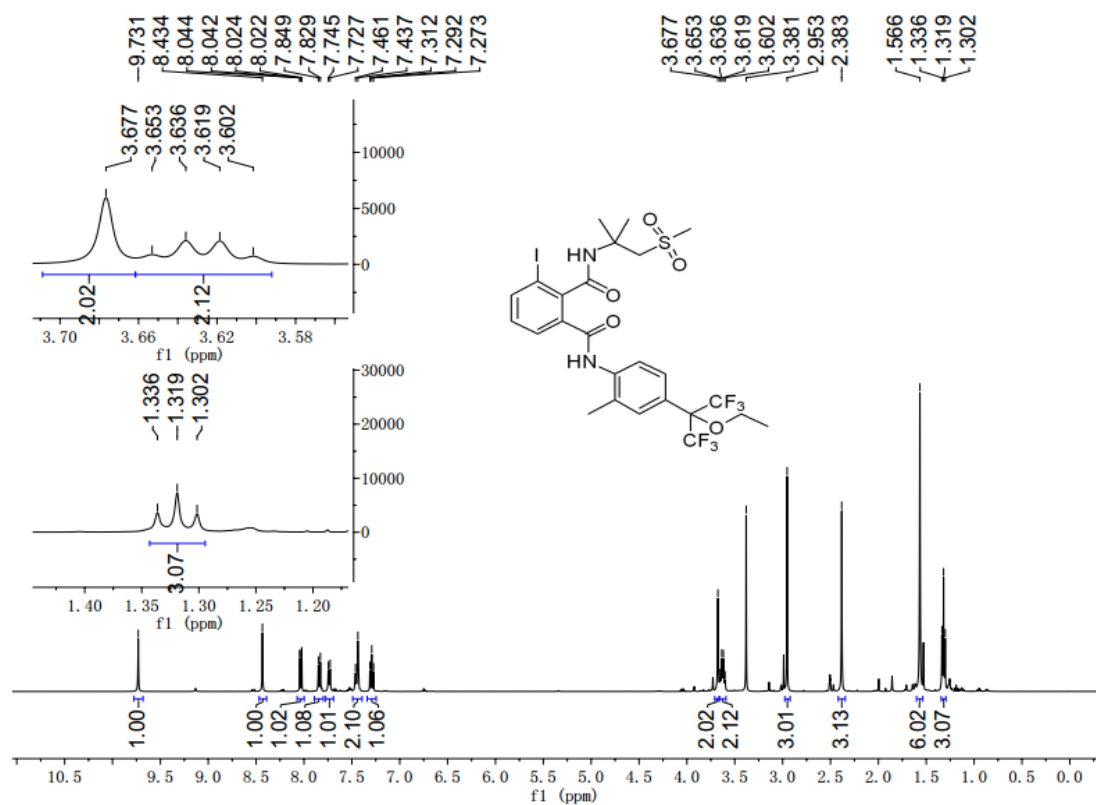

### <sup>13</sup>C NMR spectrum of 8b

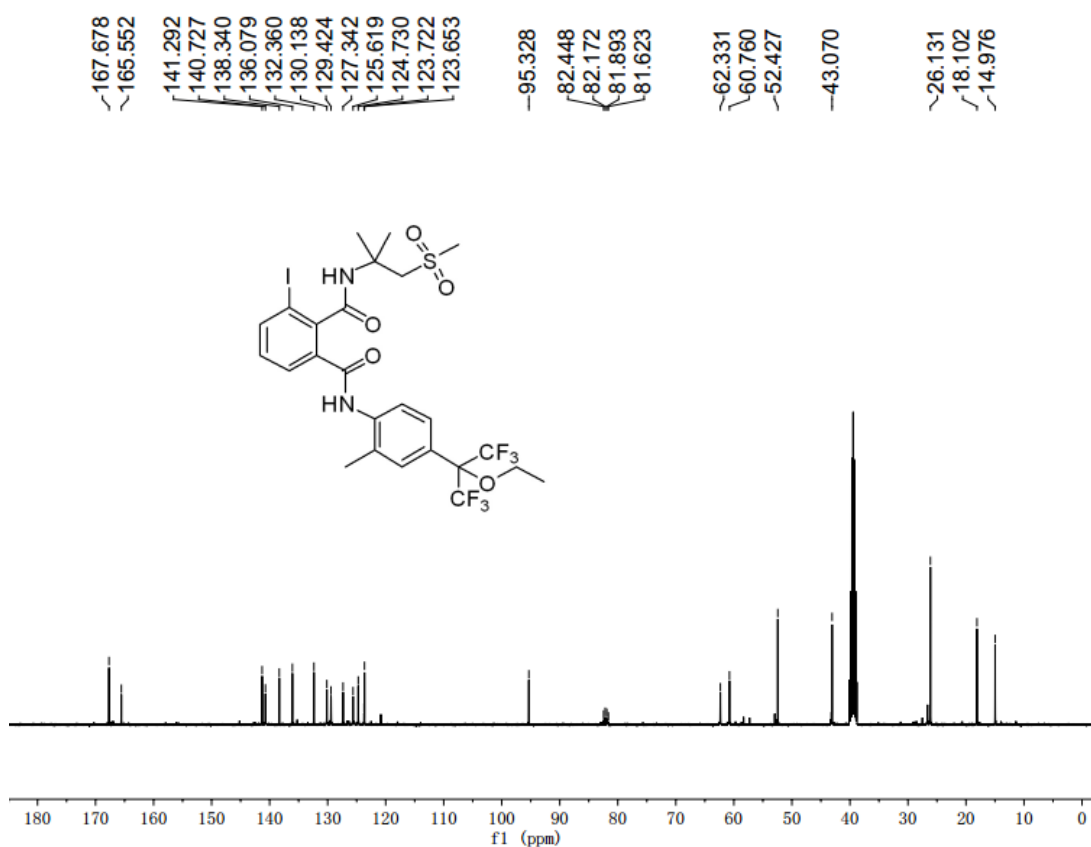

### <sup>19</sup>F NMR spectrum of 8b

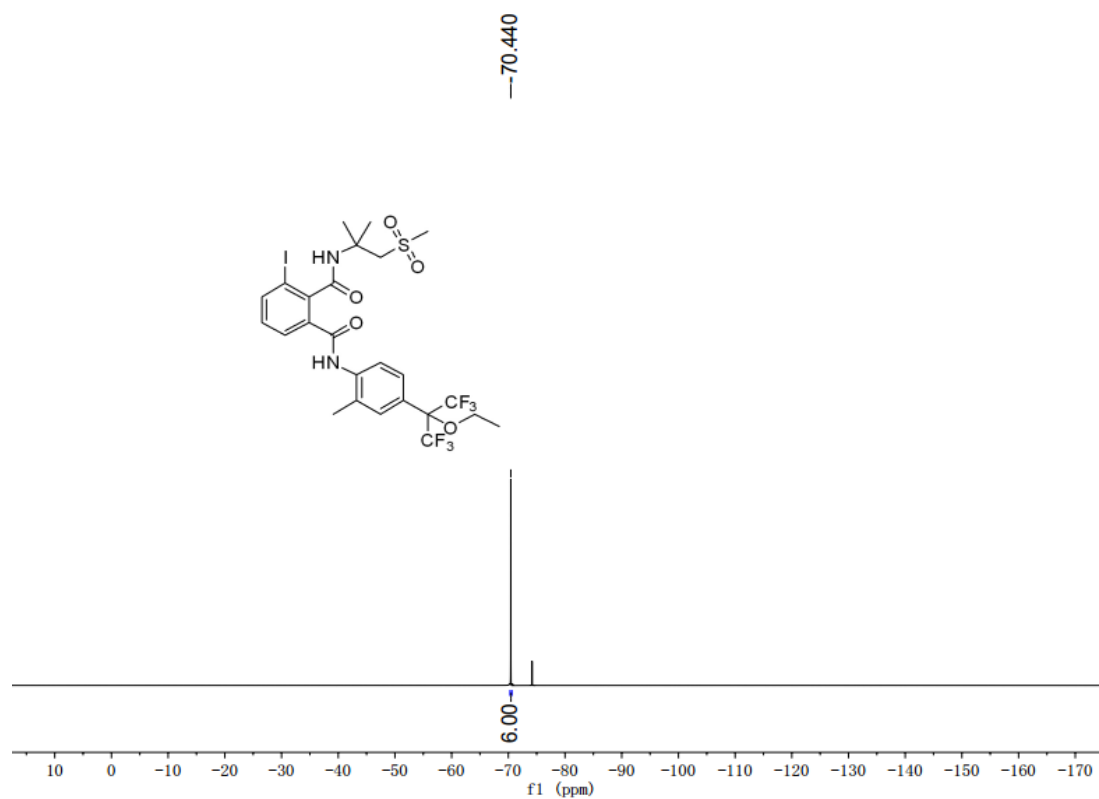

### HRMS (ESI) of 8b

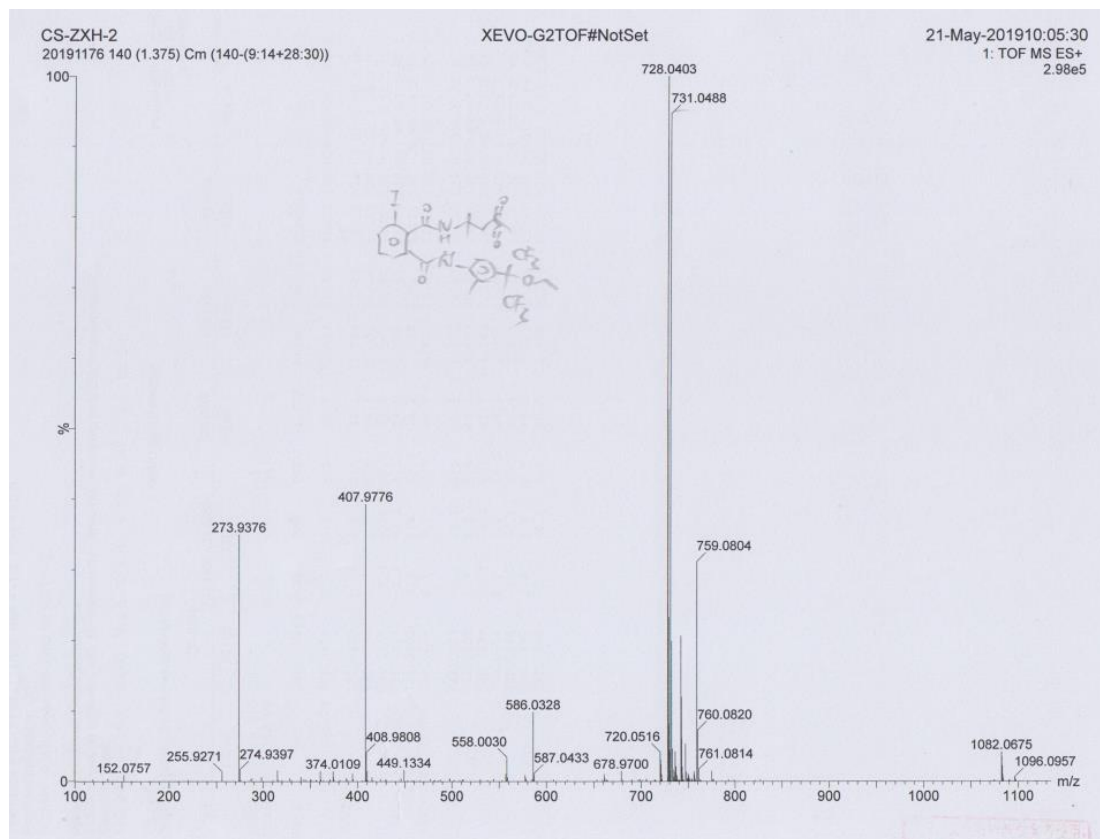

<sup>1</sup>H NMR spectrum of 8c

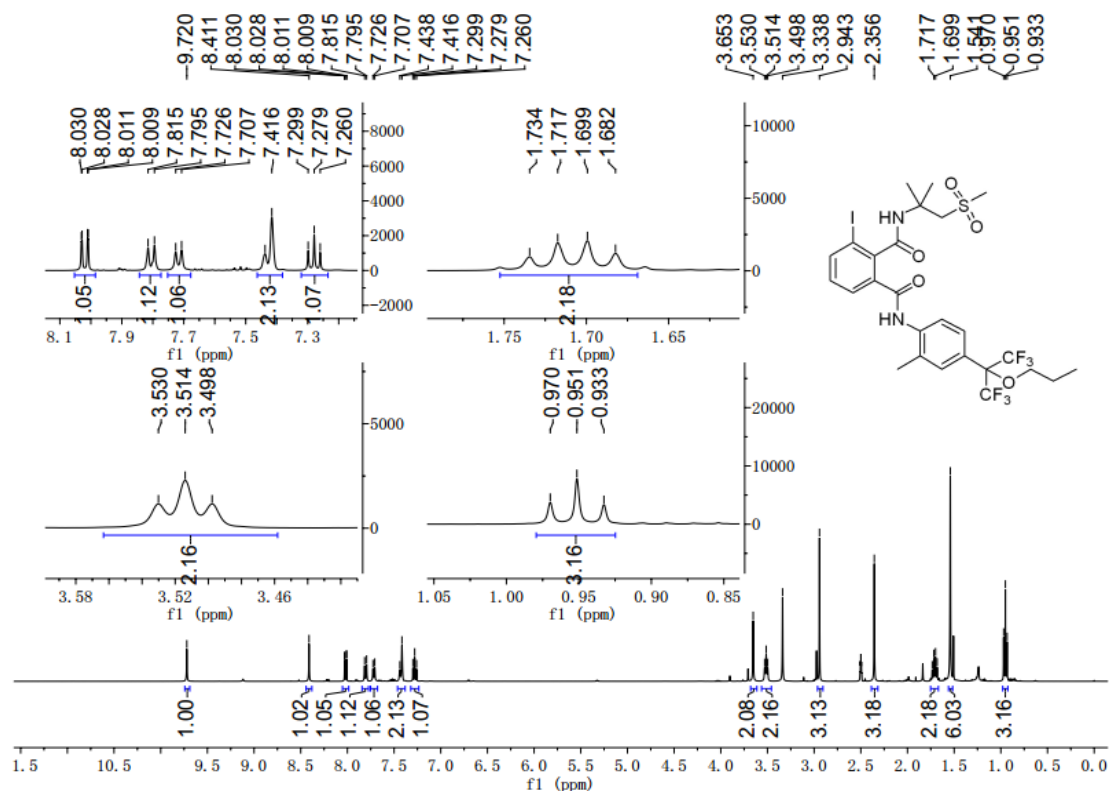

<sup>13</sup>C NMR spectrum of 8c

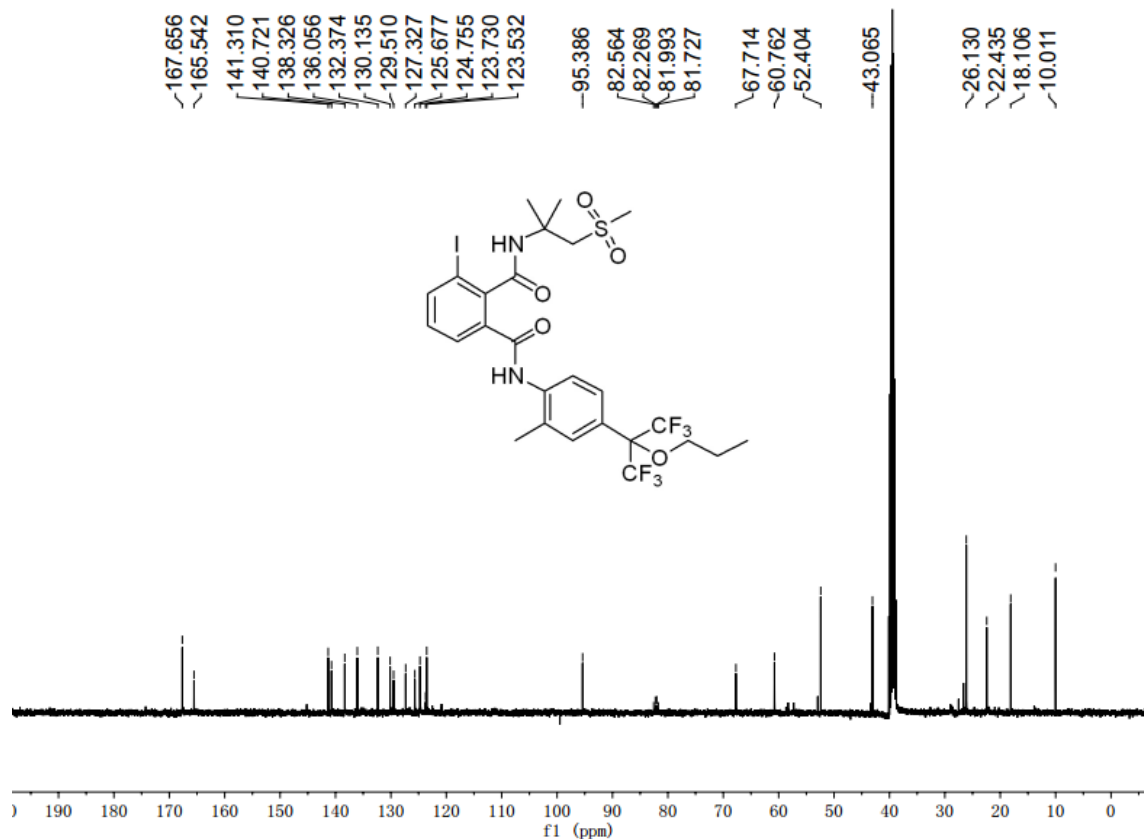

### $^{19}\text{F}$ NMR spectrum of 8c

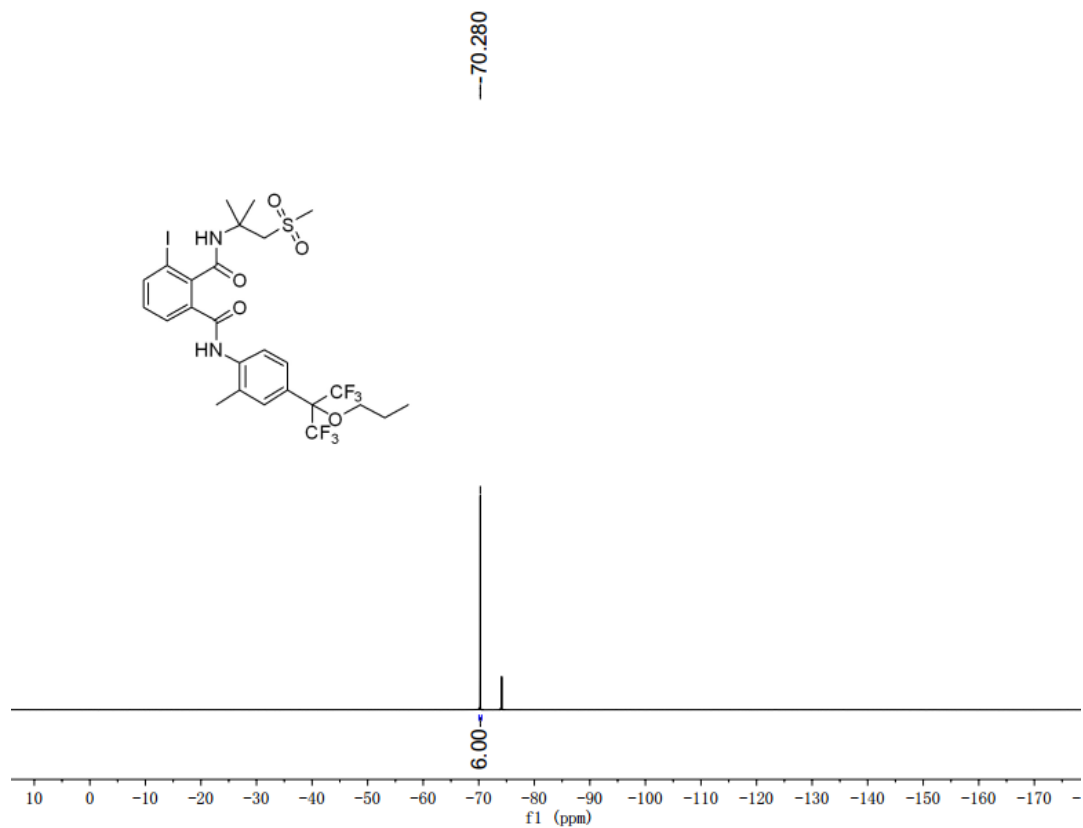

### HRMS (ESI) of 8c

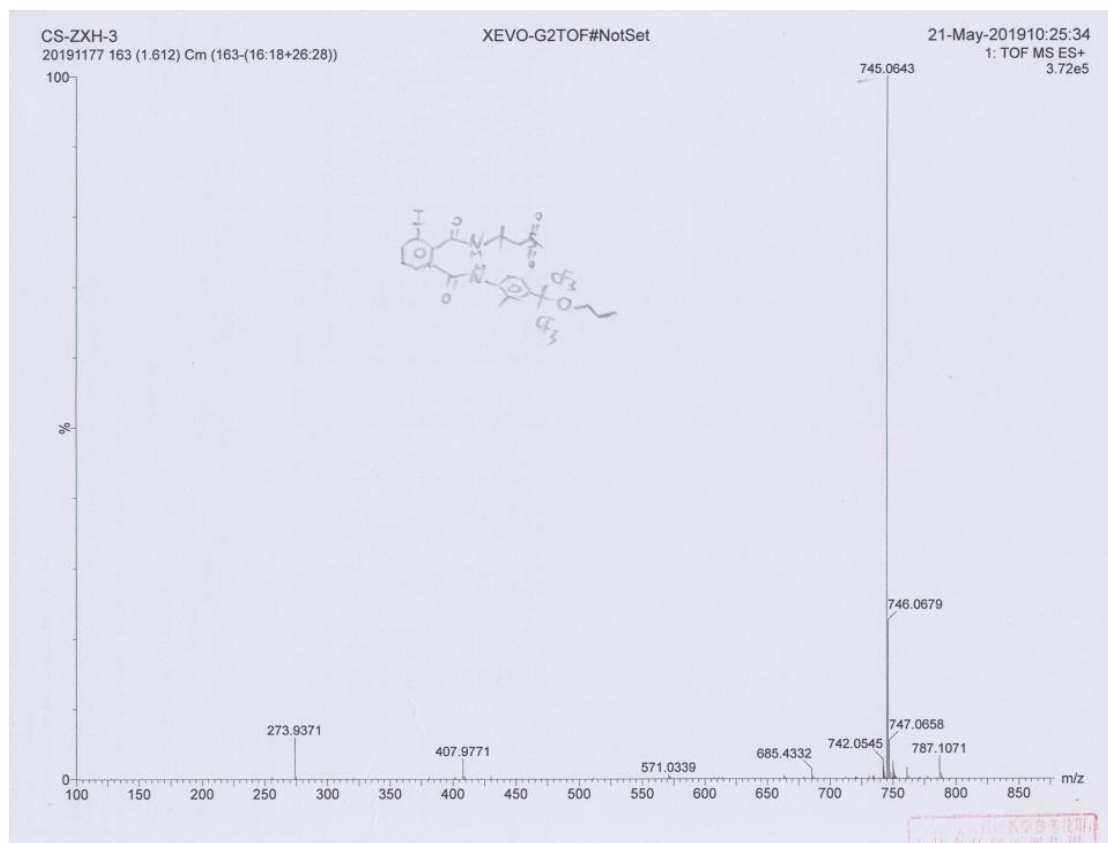

### <sup>1</sup>H NMR spectrum of 8d

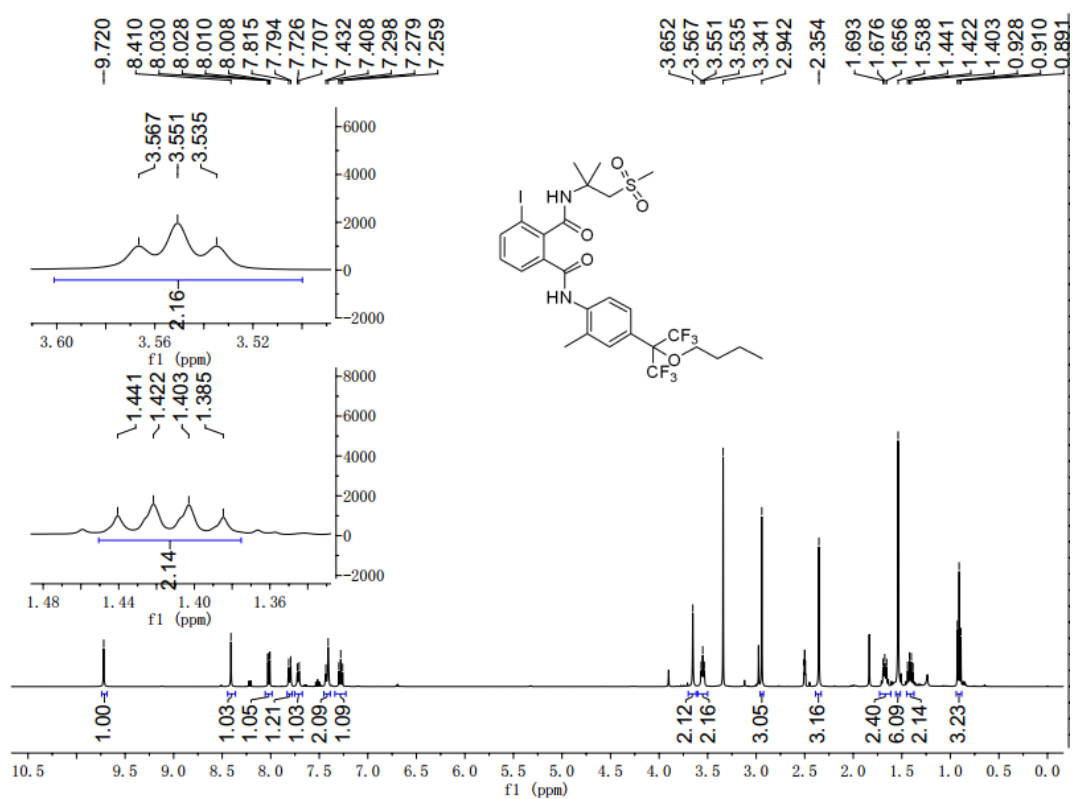

### <sup>13</sup>C NMR spectrum of 8d

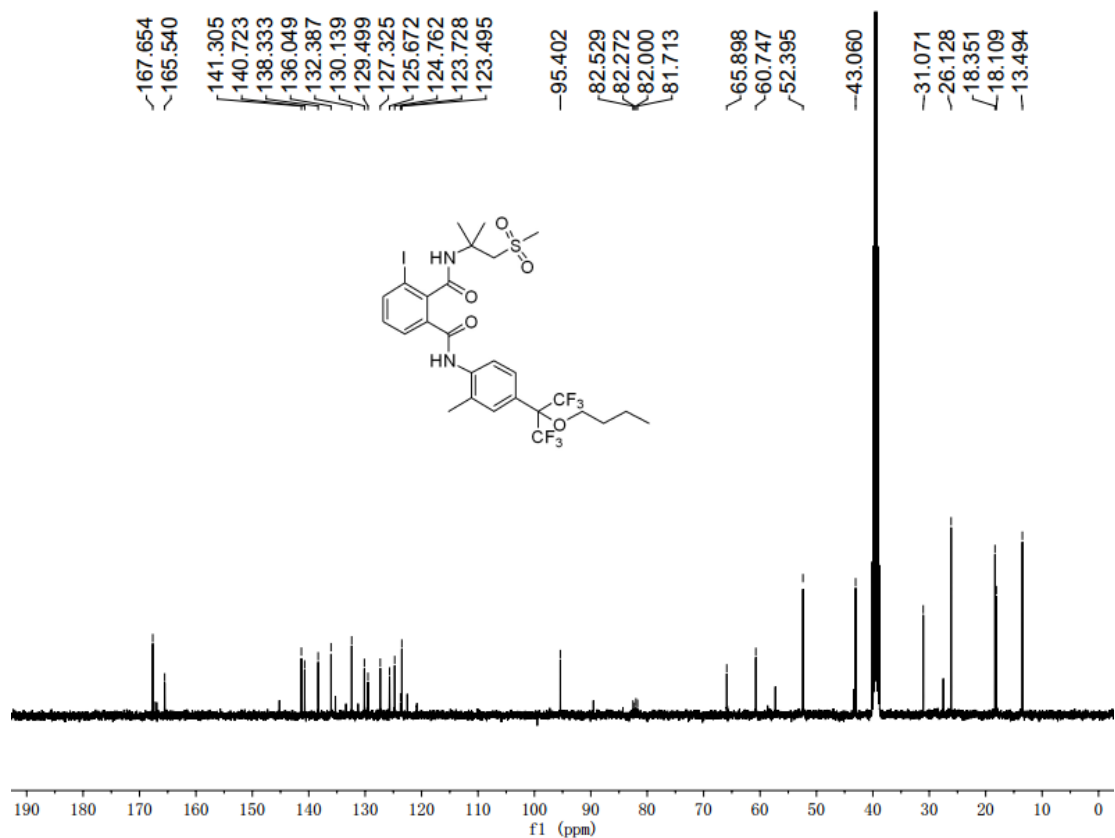

# <sup>19</sup>F NMR spectrum of 8d

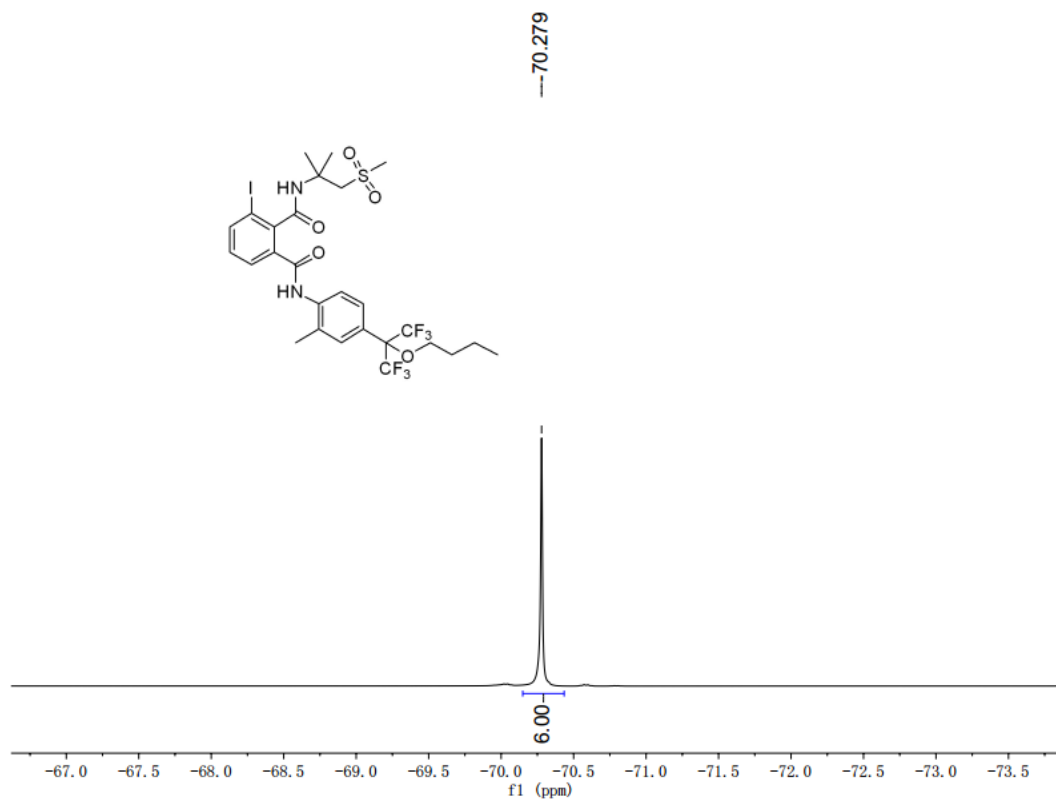

# HRMS (ESI) of 8d

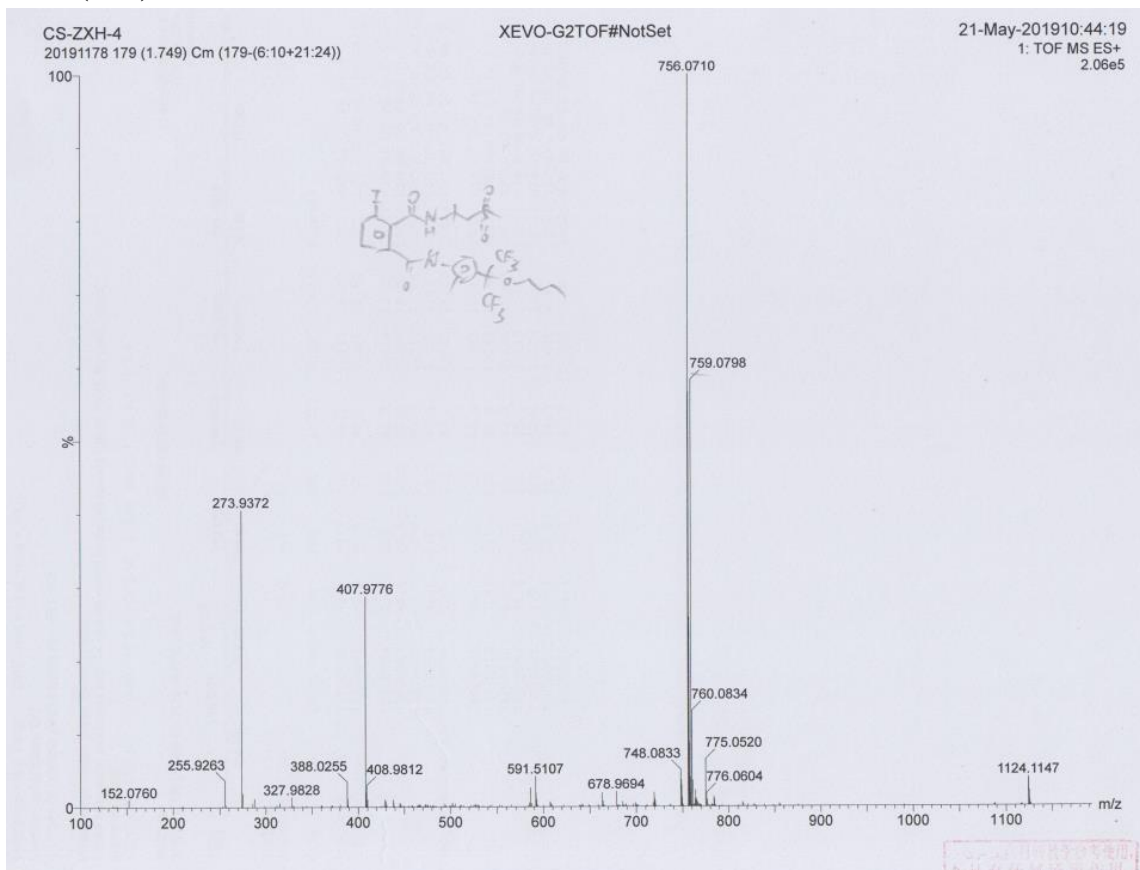

### <sup>1</sup>H NMR spectrum of 8e

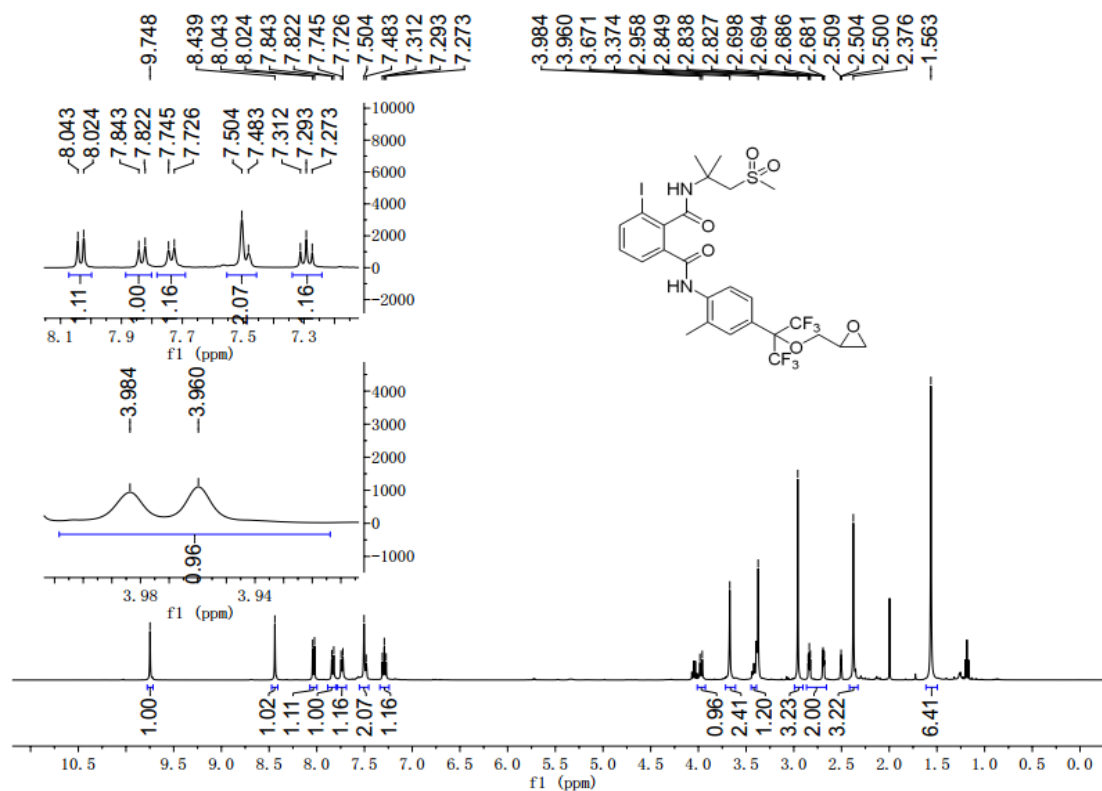

### <sup>13</sup>C NMR spectrum of 8e

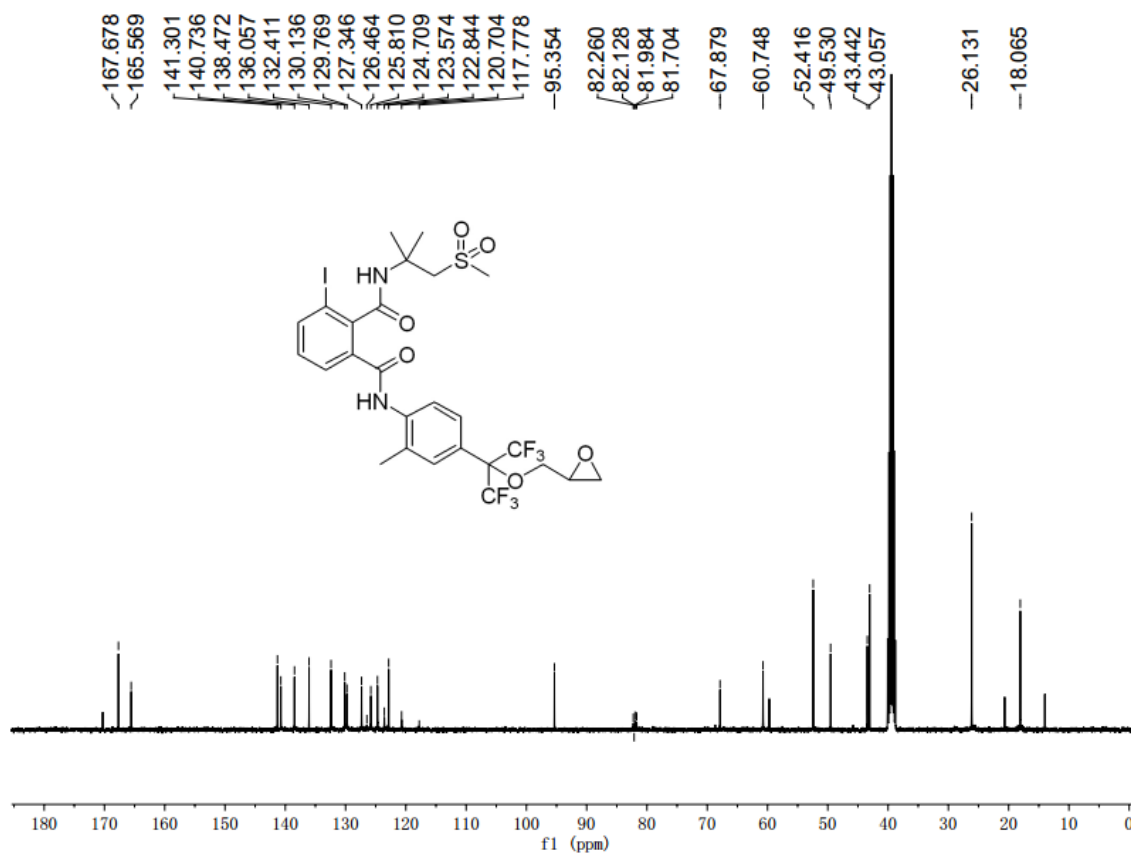



### <sup>19</sup>F NMR spectrum of 8e

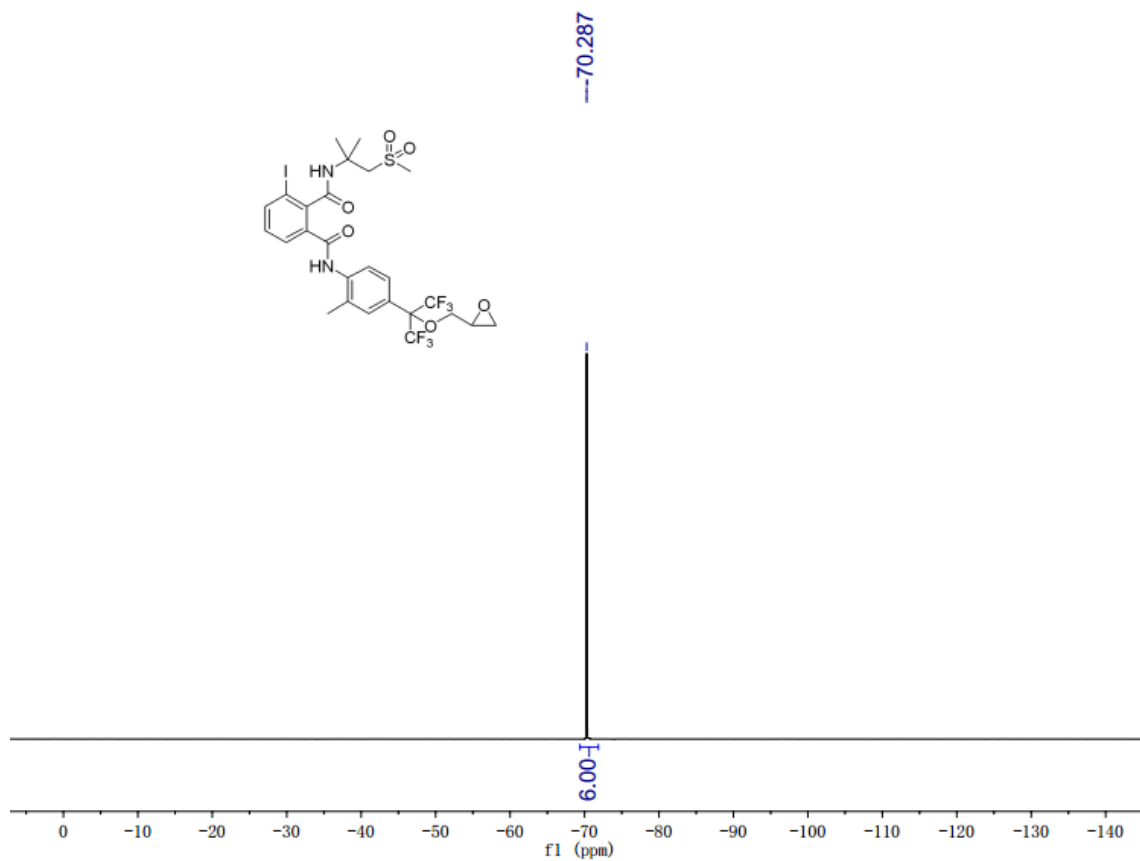

### HRMS (ESI) of 8e

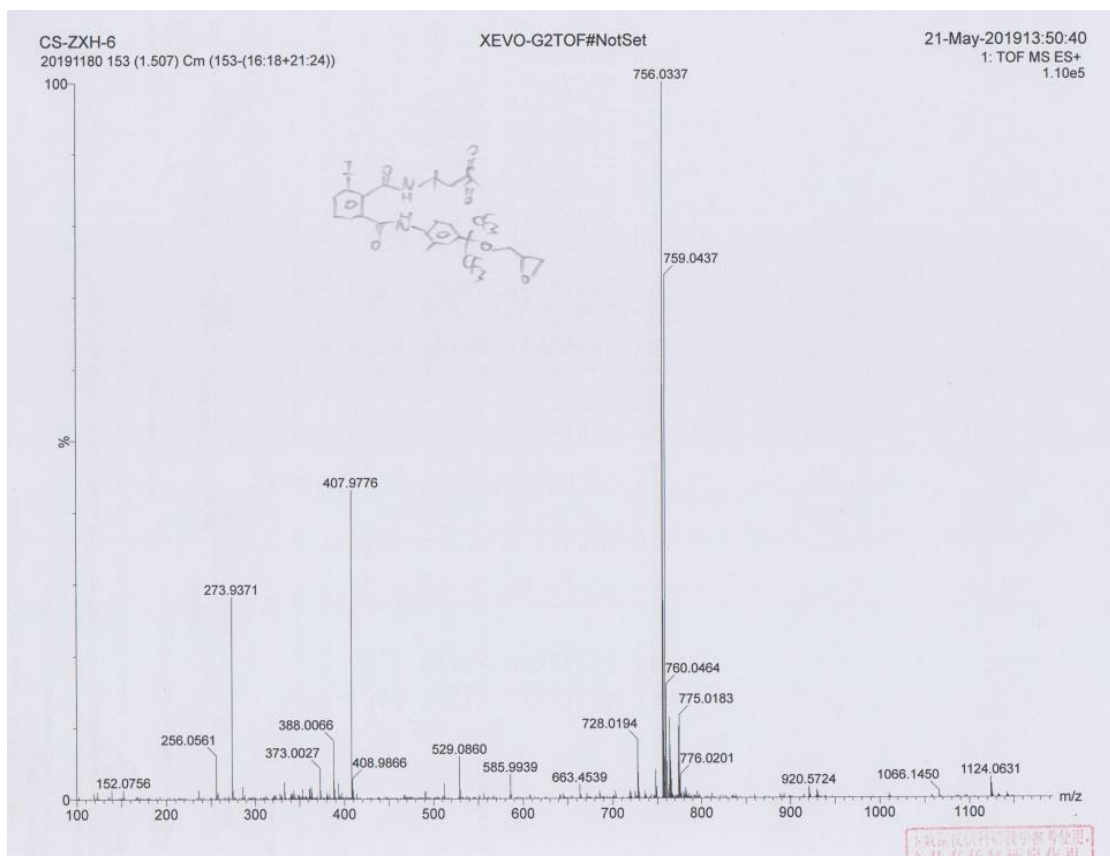

### <sup>1</sup>H NMR spectrum of 8f

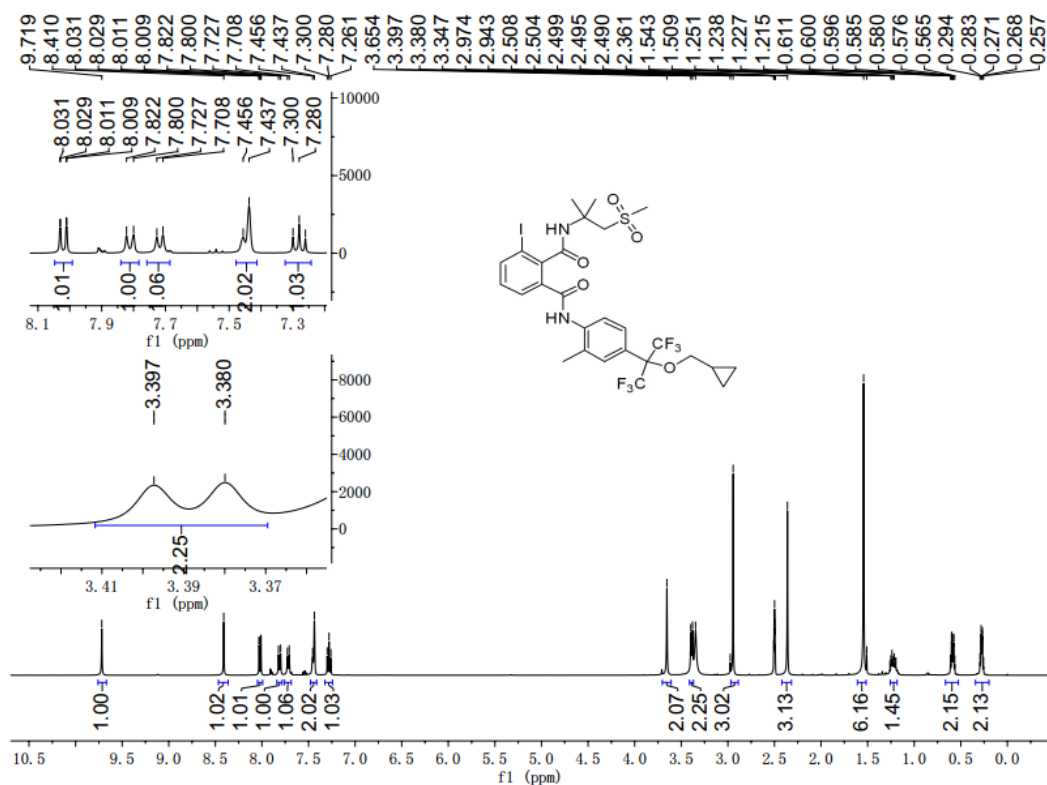

### <sup>13</sup>C NMR spectrum of 8f

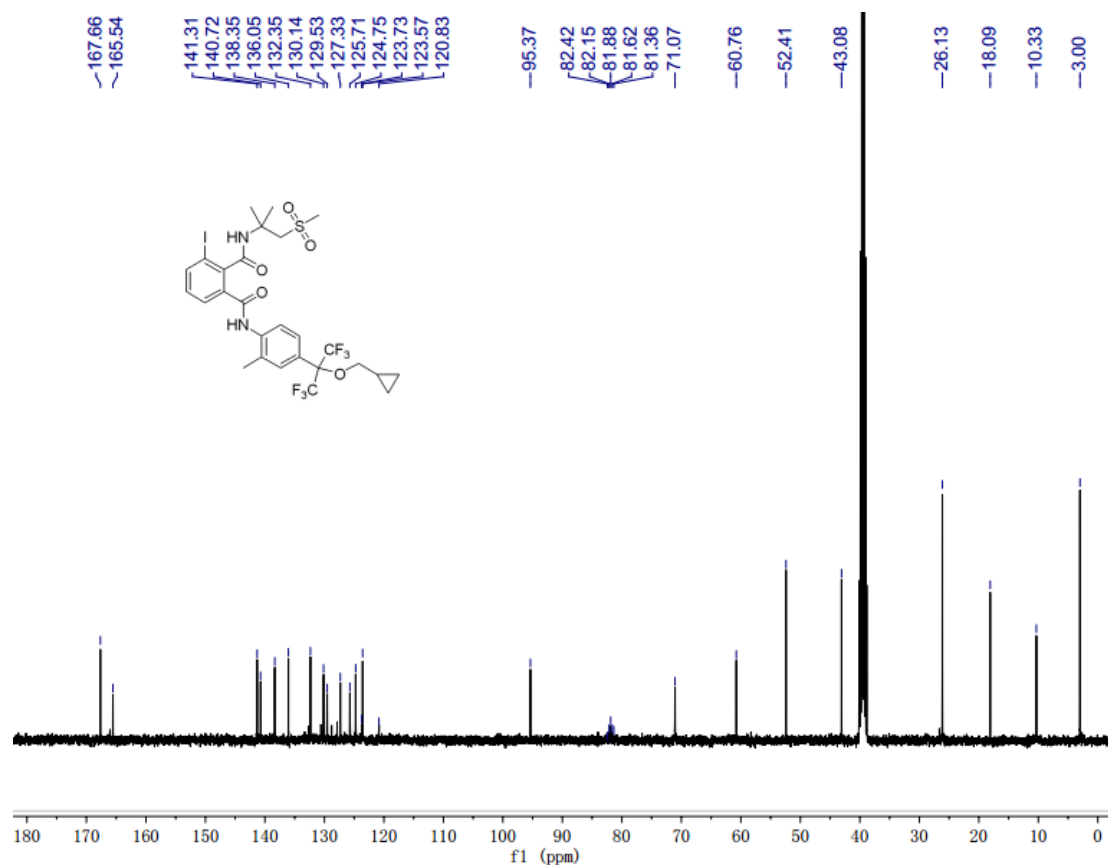

### <sup>19</sup>F NMR spectrum of 8f

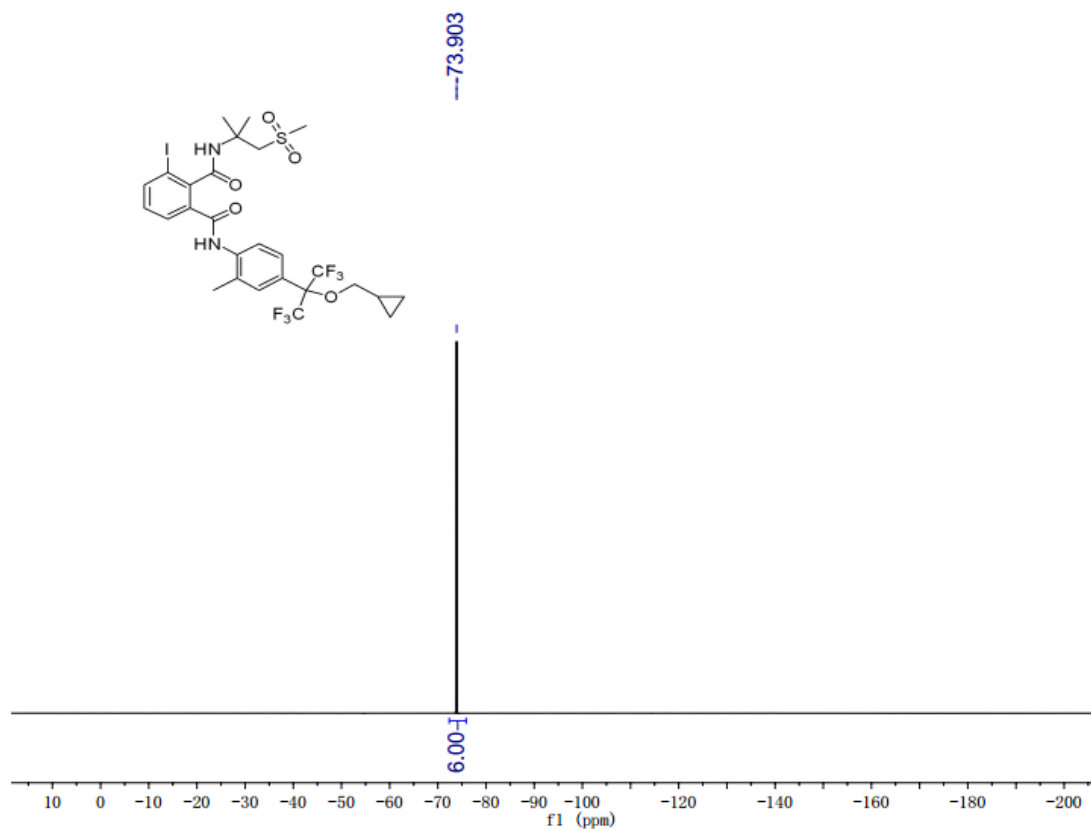

### HRMS (ESI) of 8f

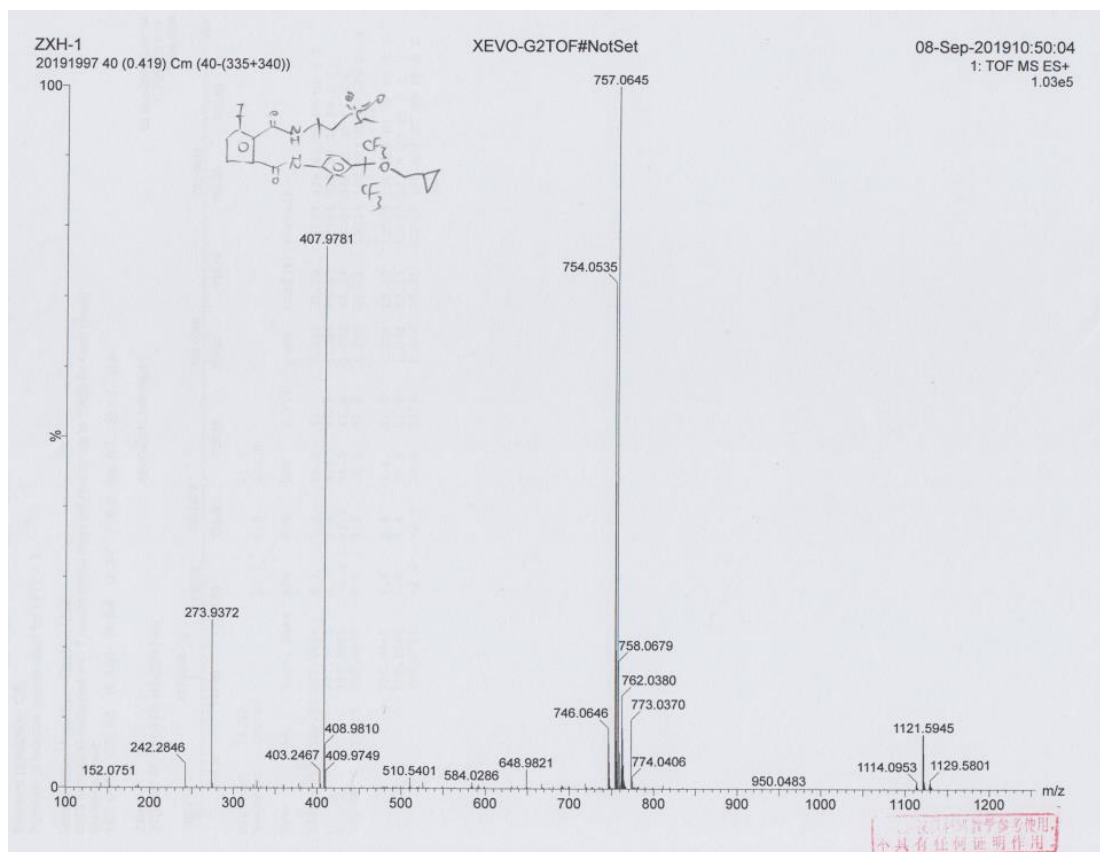

### <sup>1</sup>H NMR spectrum of 8g

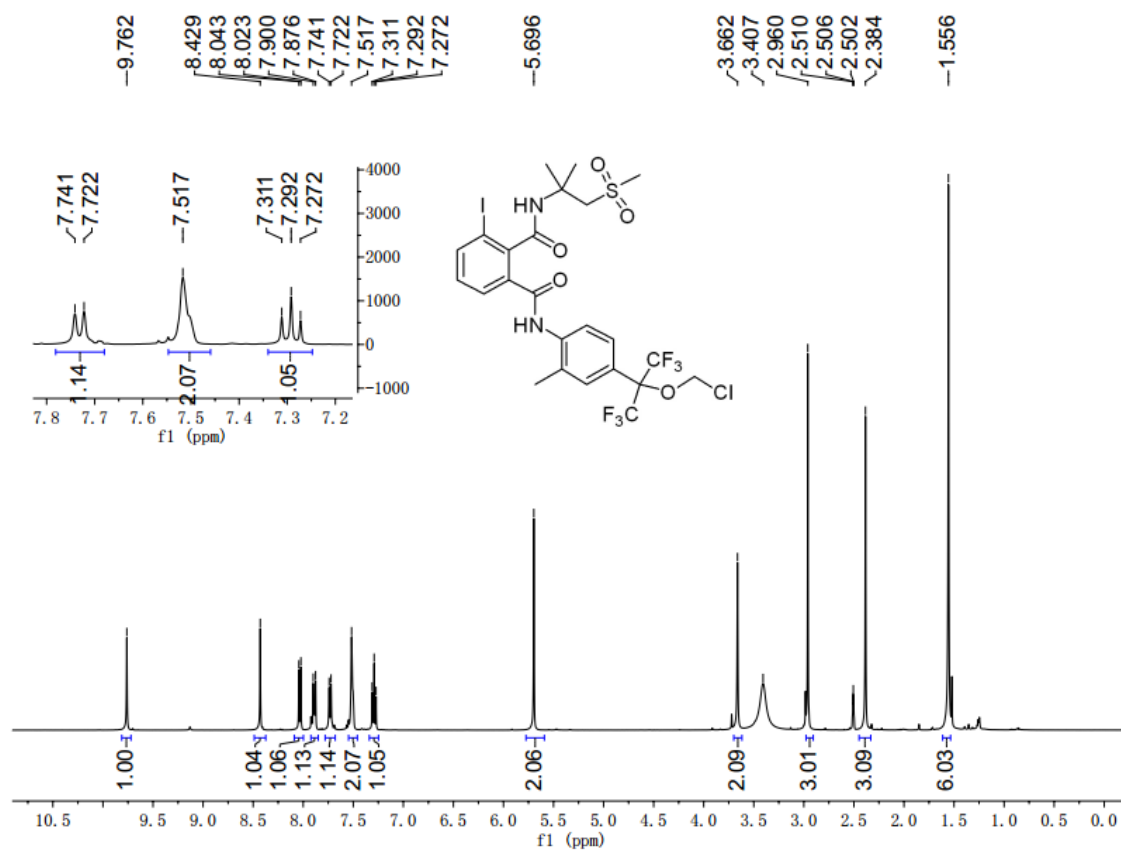

### <sup>13</sup>C NMR spectrum of 8g

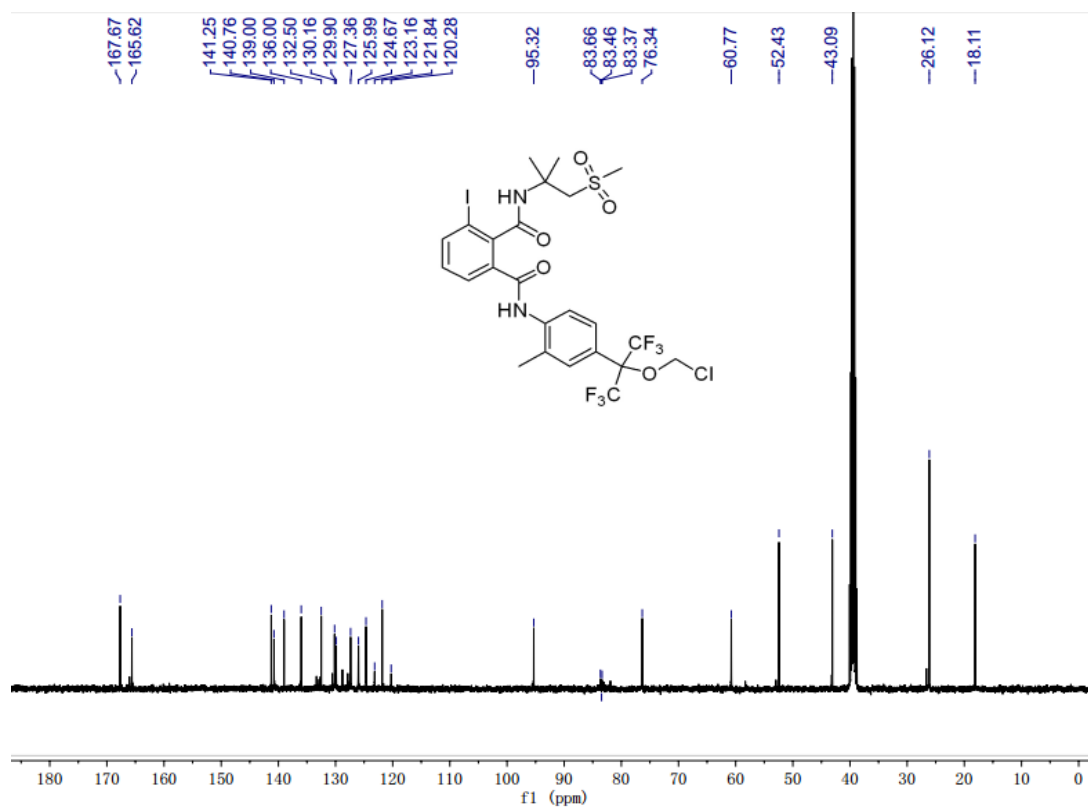

### <sup>19</sup>F NMR spectrum of 8g

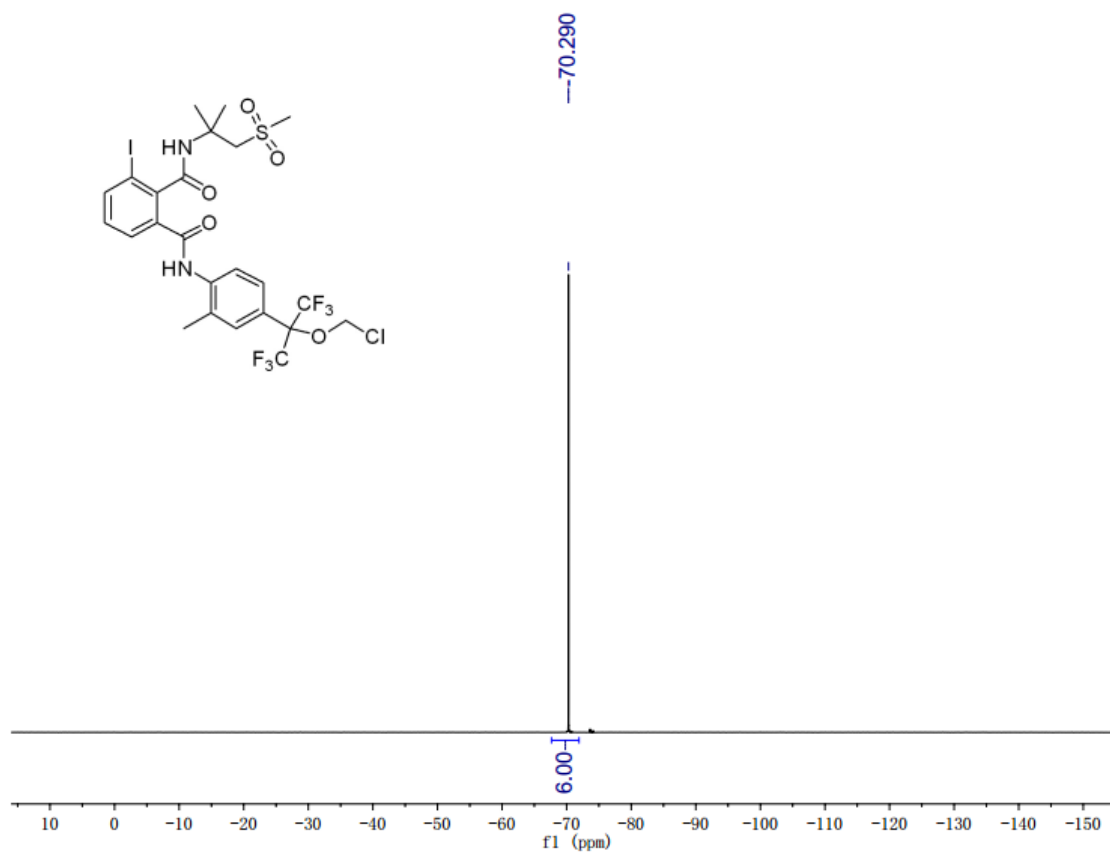

### HRMS (ESI) of 8g

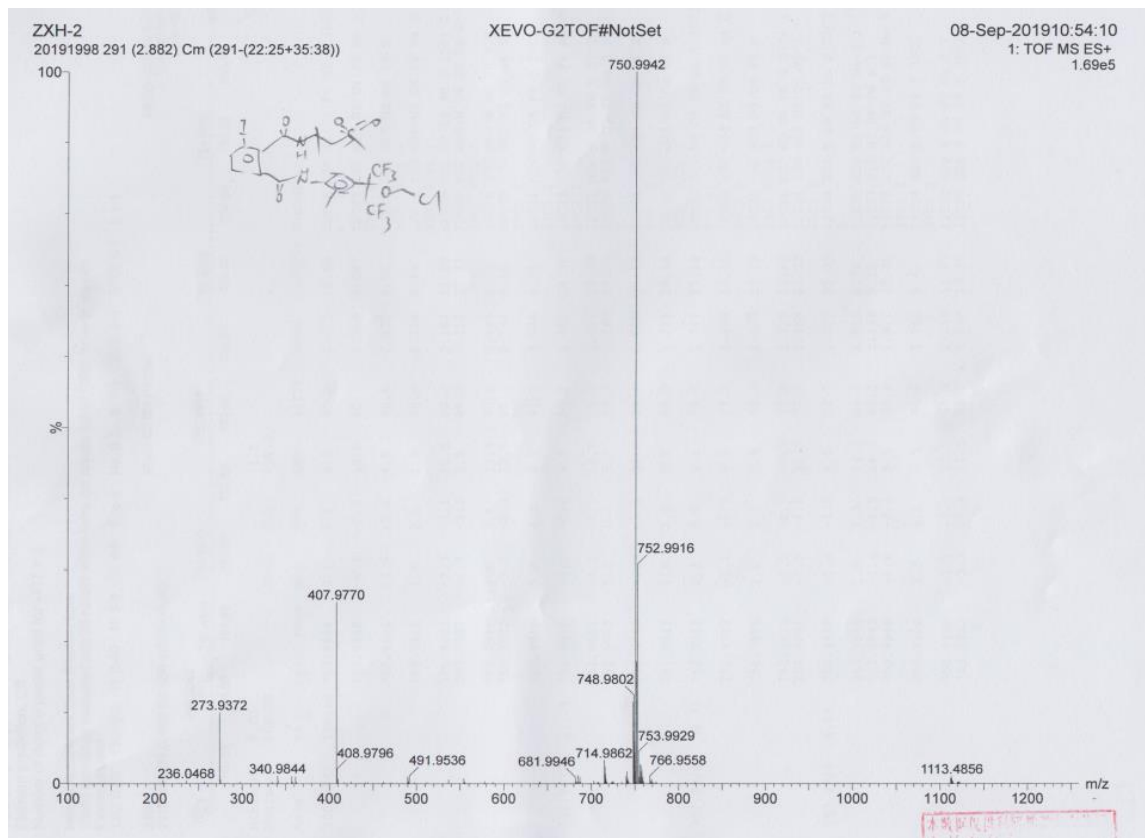

**<sup>1</sup>H NMR spectrum of 8h**

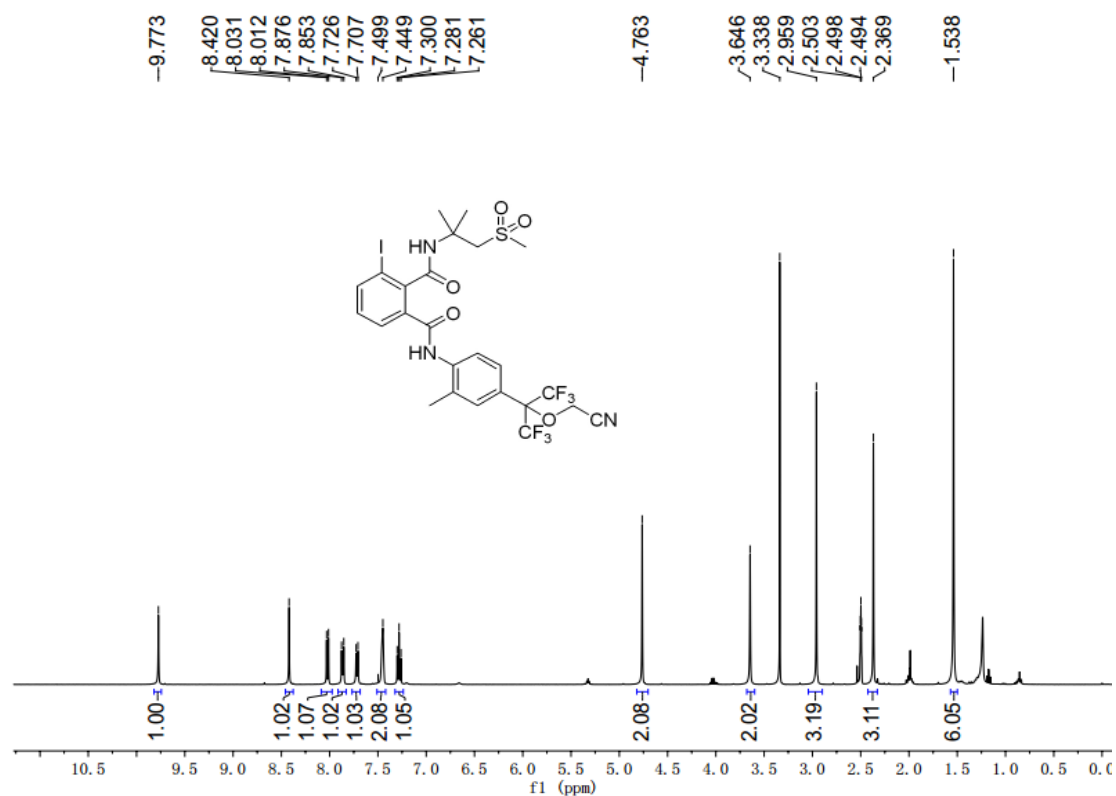

**<sup>13</sup>C NMR spectrum of 8h**

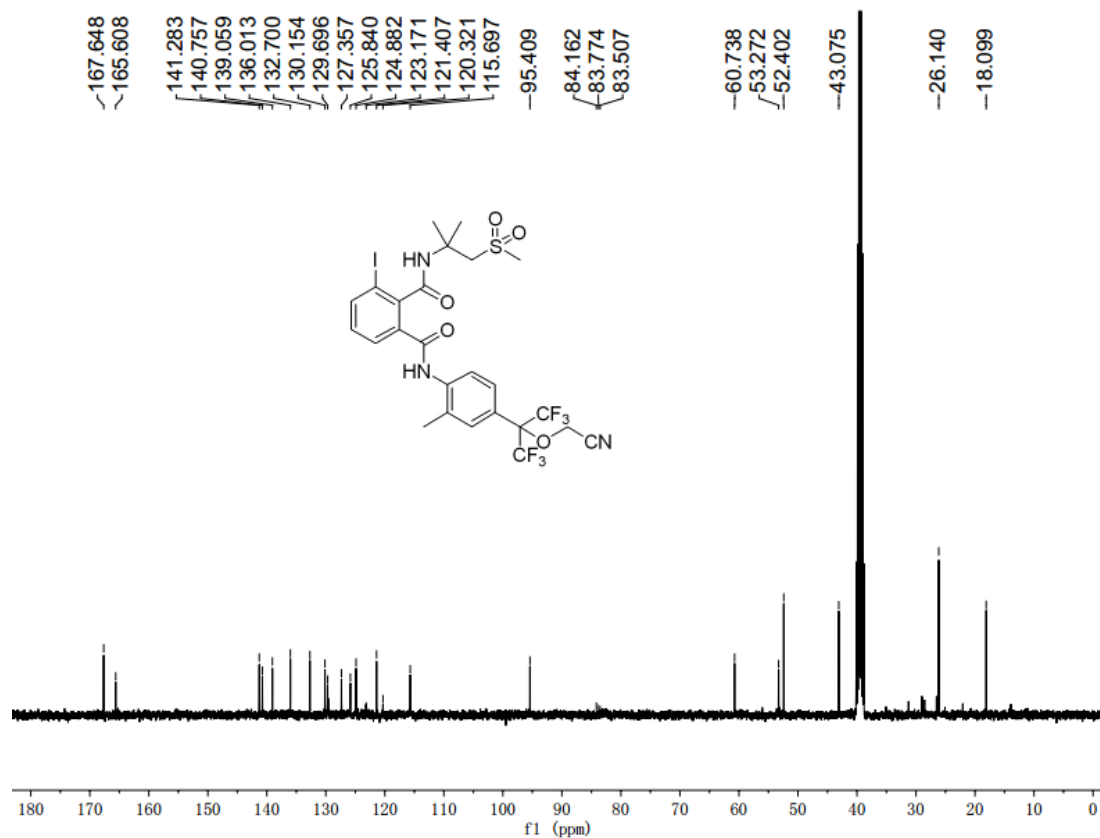

### <sup>19</sup>F NMR spectrum of 8h

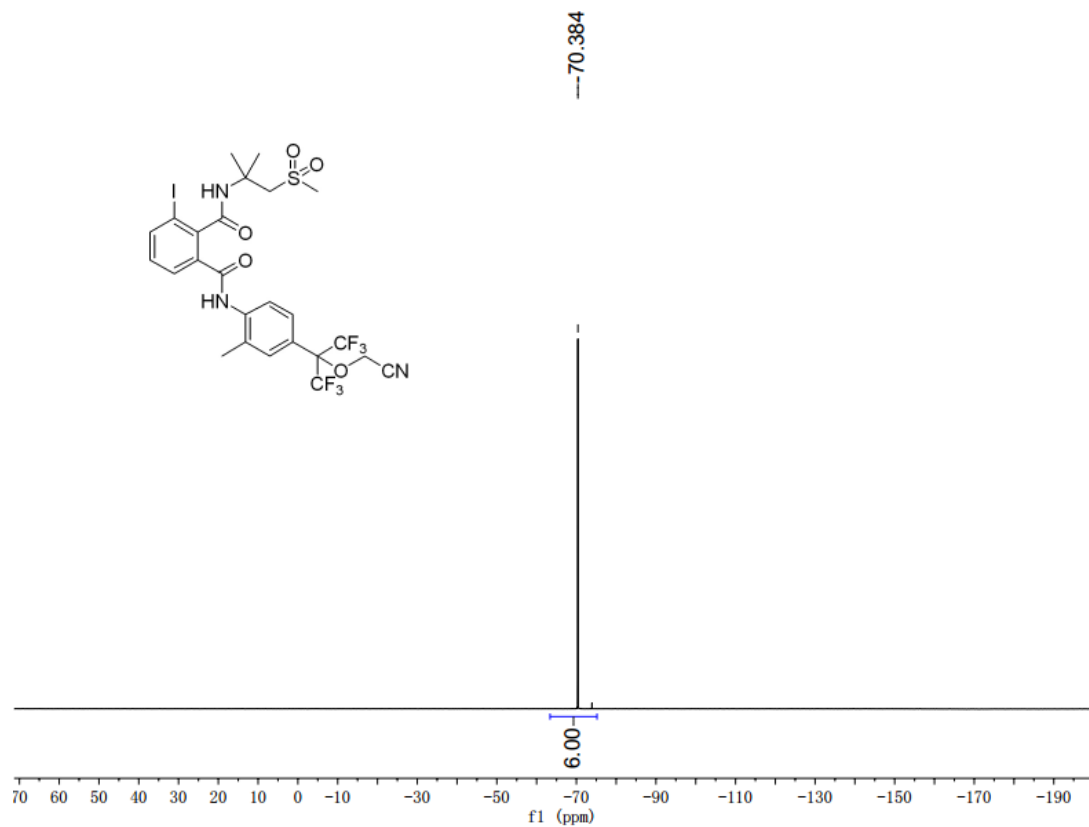

### HRMS (ESI) of 8h

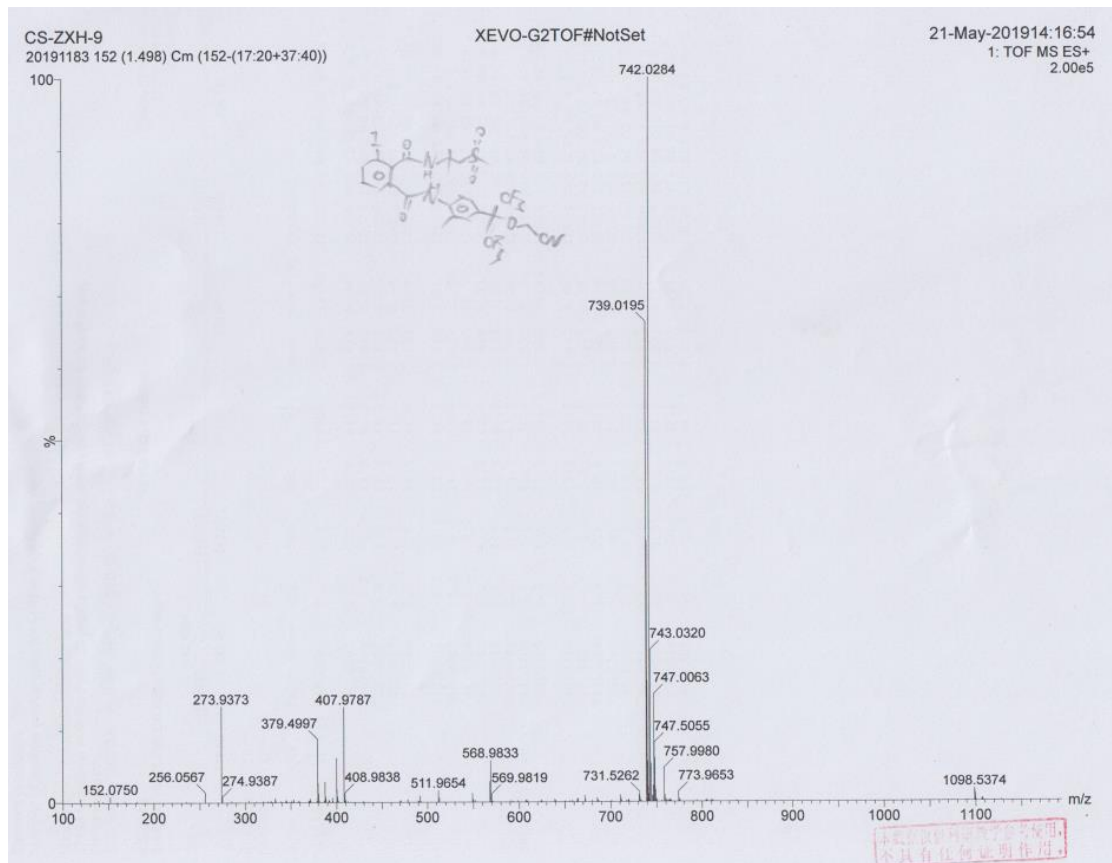

### <sup>1</sup>H NMR spectrum of 8i

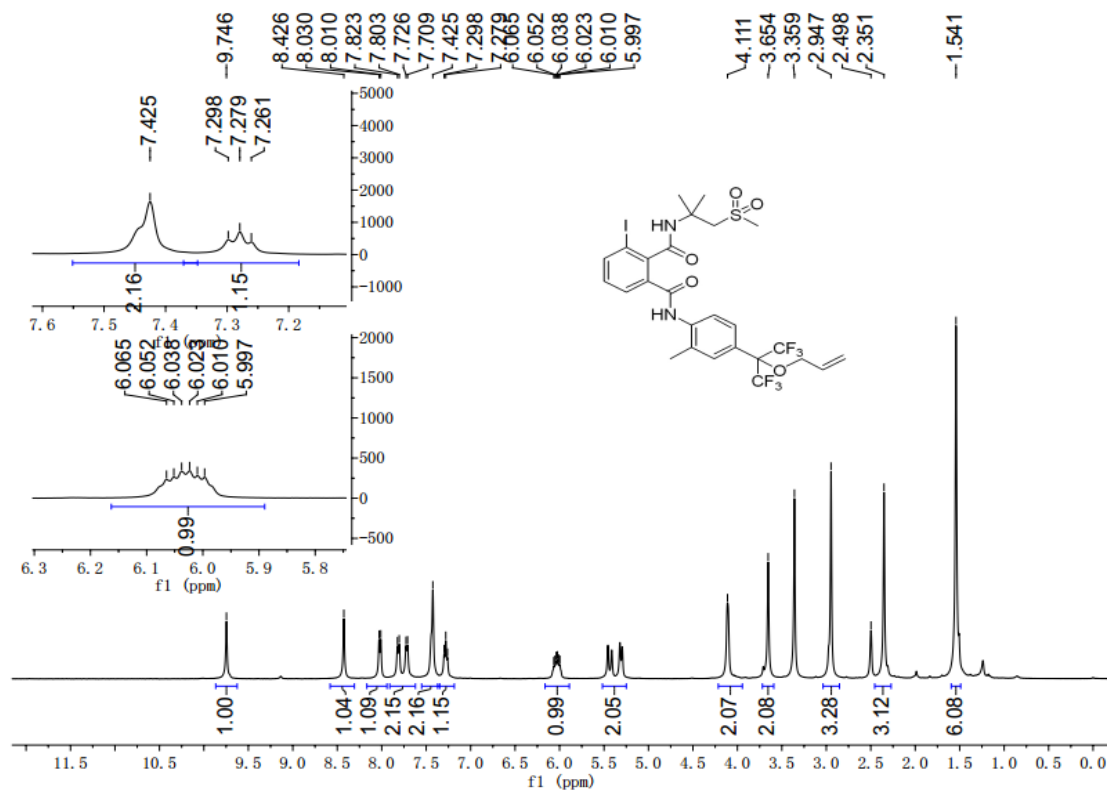

### <sup>13</sup>C NMR spectrum of 8i

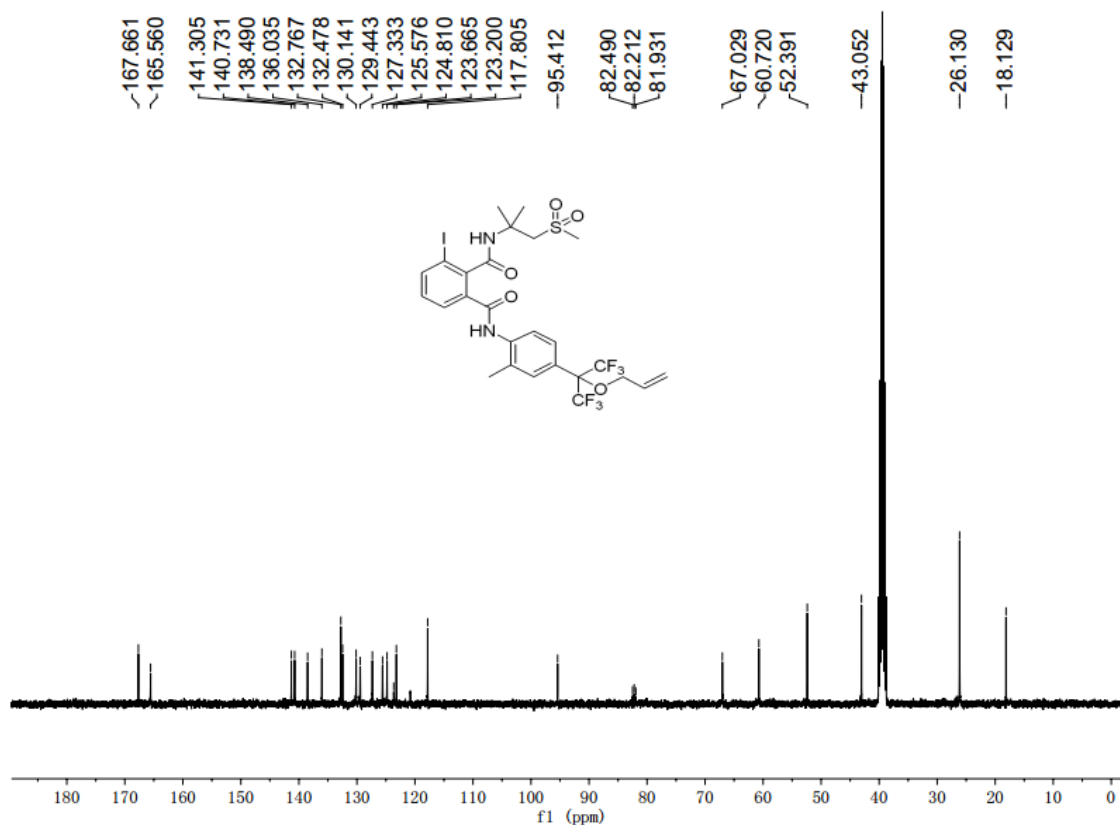



# <sup>19</sup>F NMR spectrum of 8i

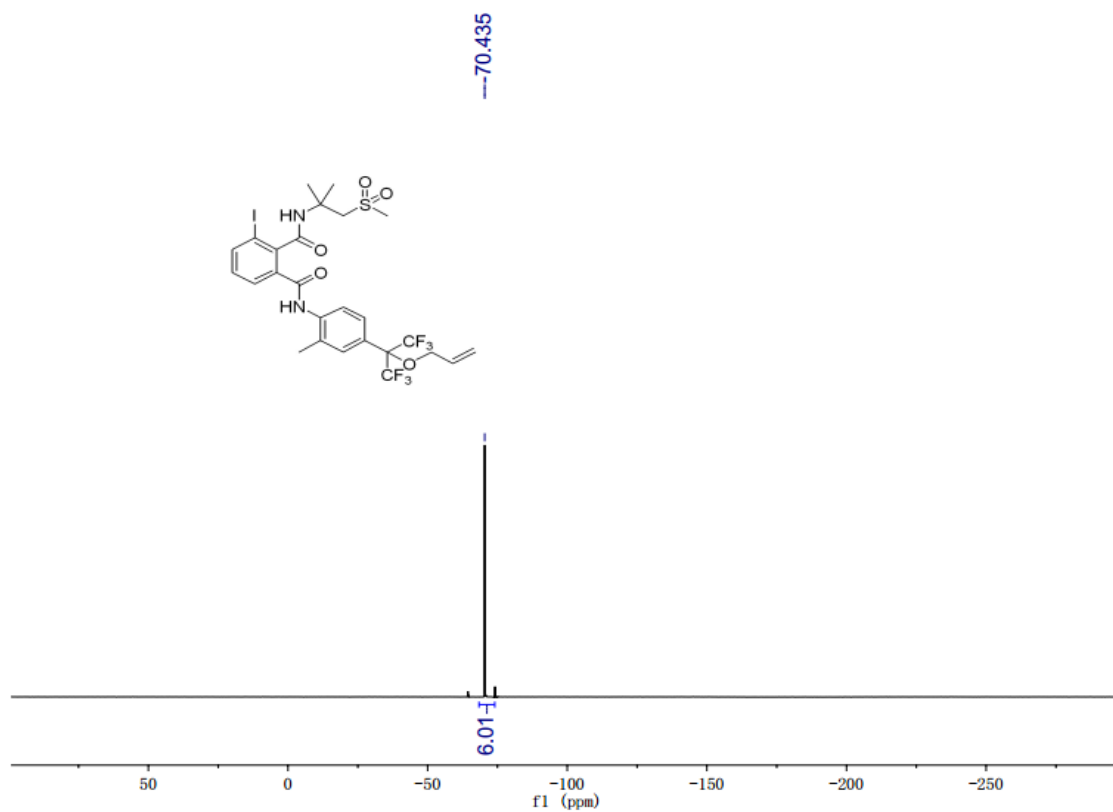

# HRMS (ESI) of 8i

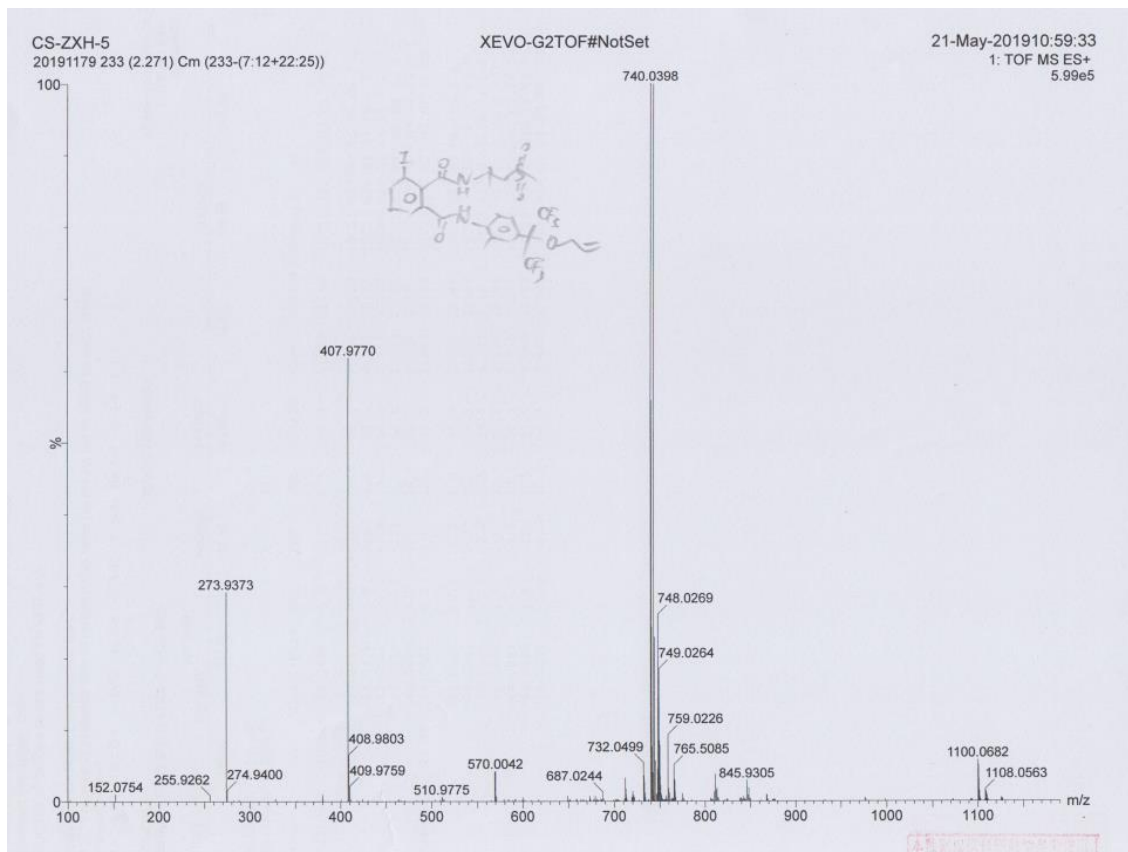

### <sup>1</sup>H NMR spectrum of 8j

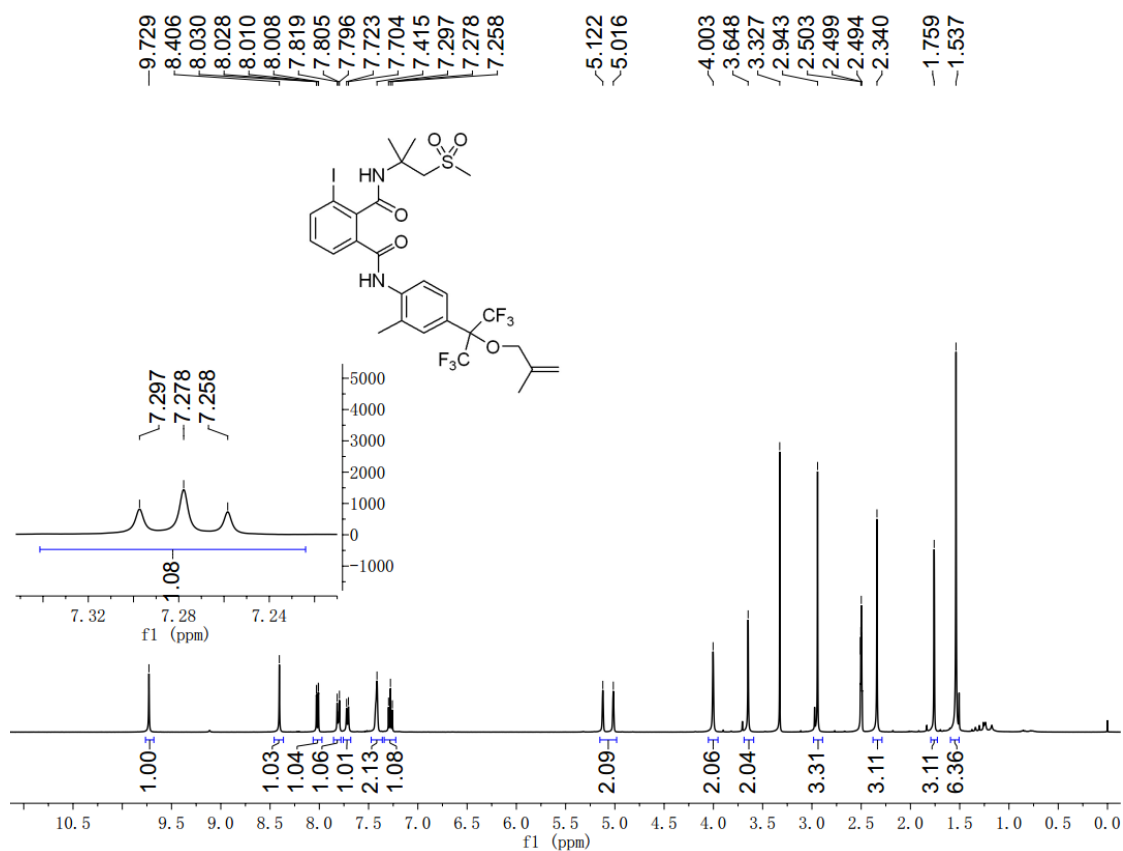

### <sup>13</sup>C NMR spectrum of 8j

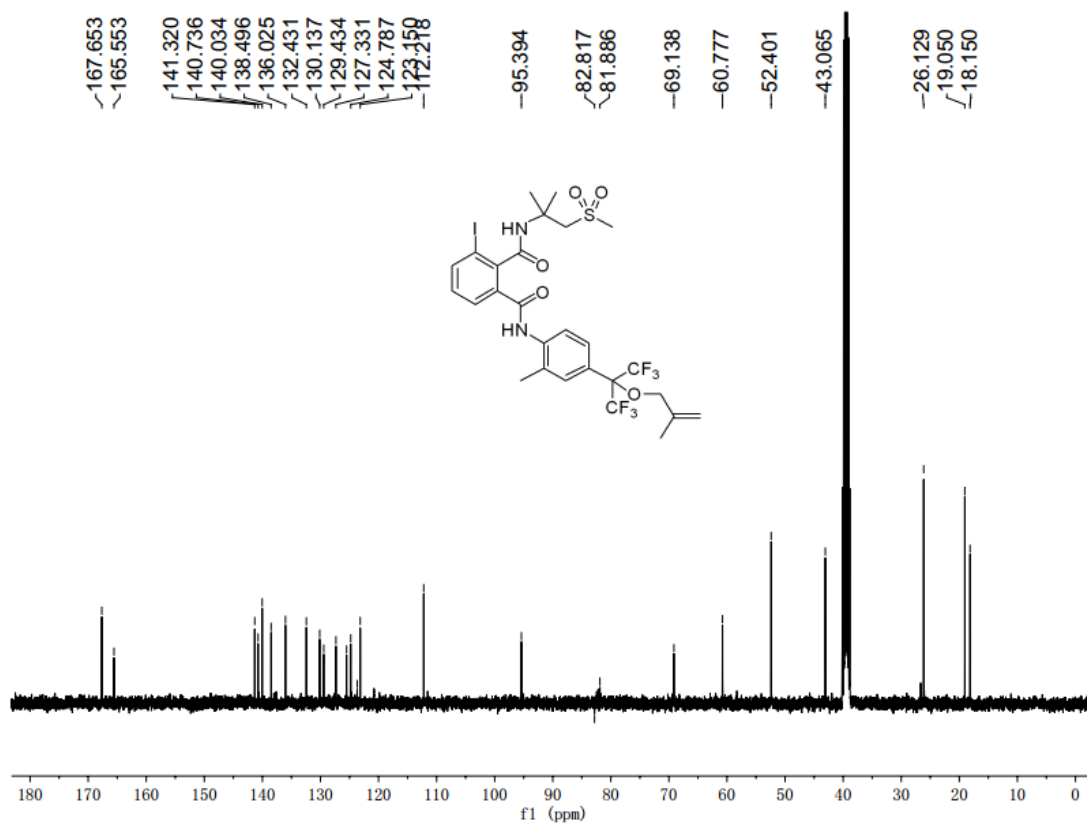

# <sup>19</sup>F NMR spectrum of 8j

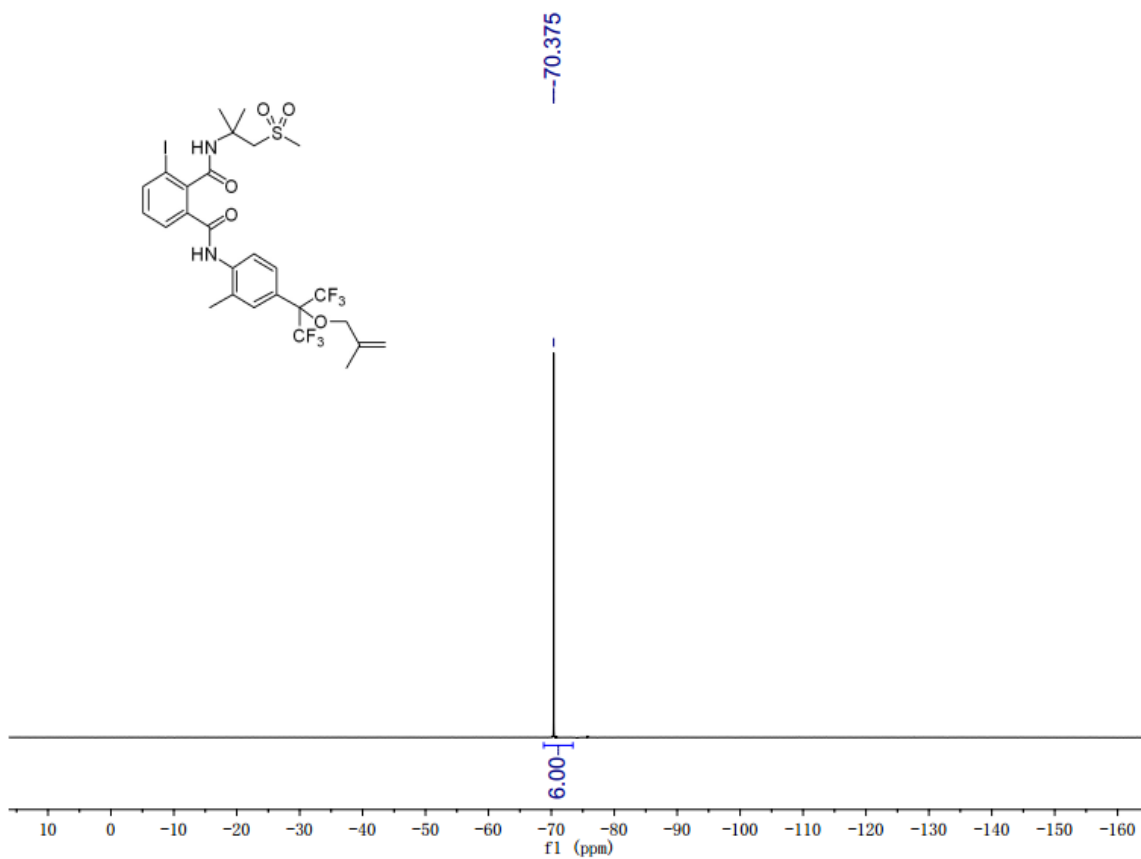

# HRMS (ESI) of 8j

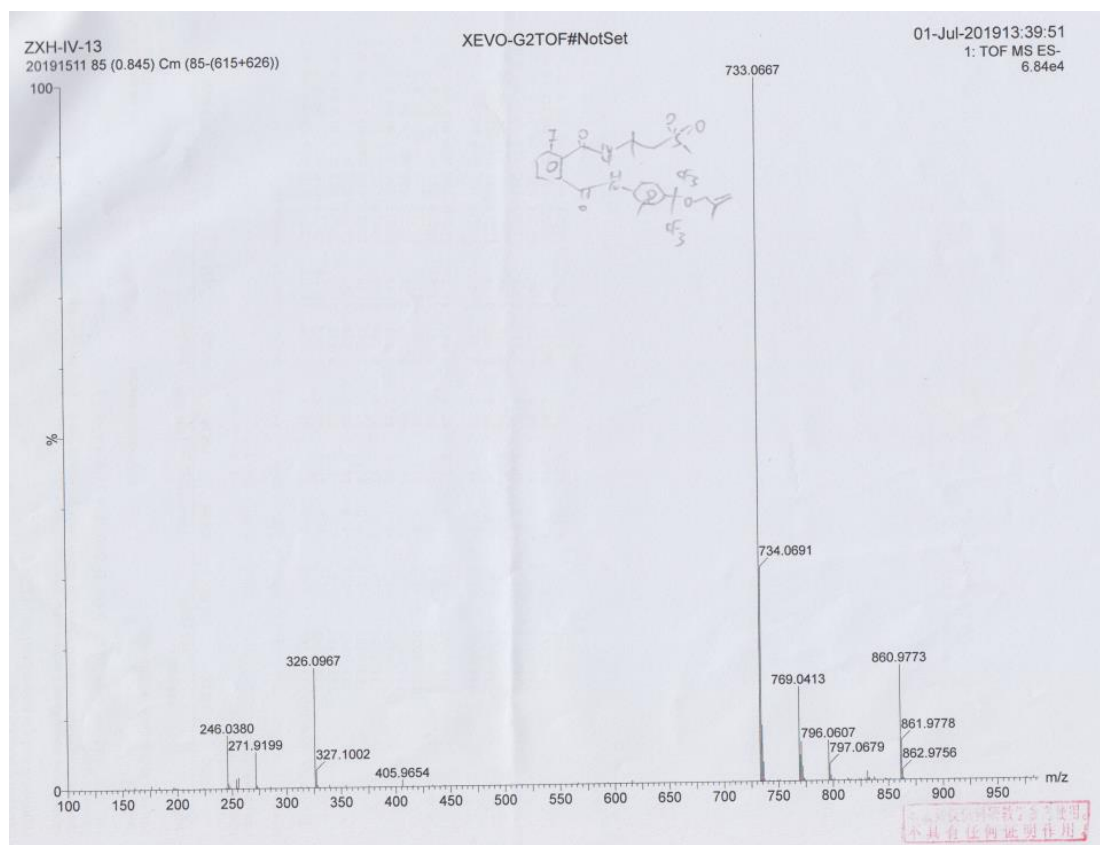

### <sup>1</sup>H NMR spectrum of 8k

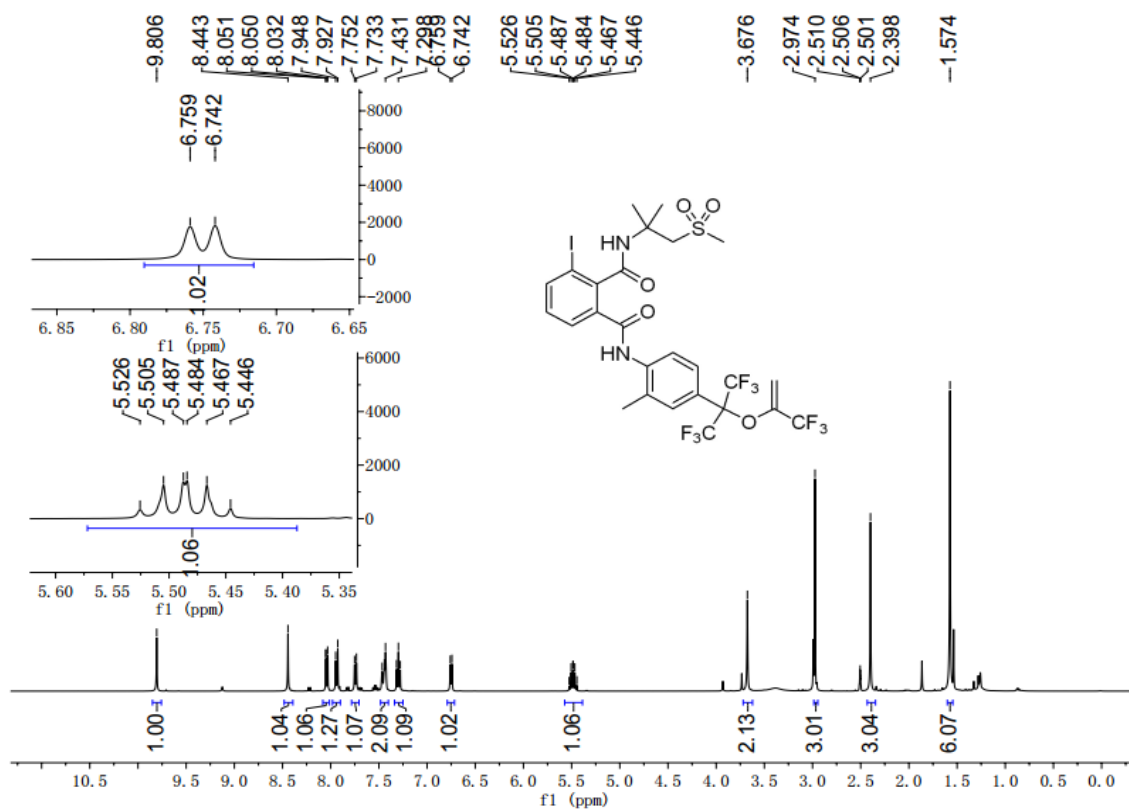

### <sup>13</sup>C NMR spectrum of 8k

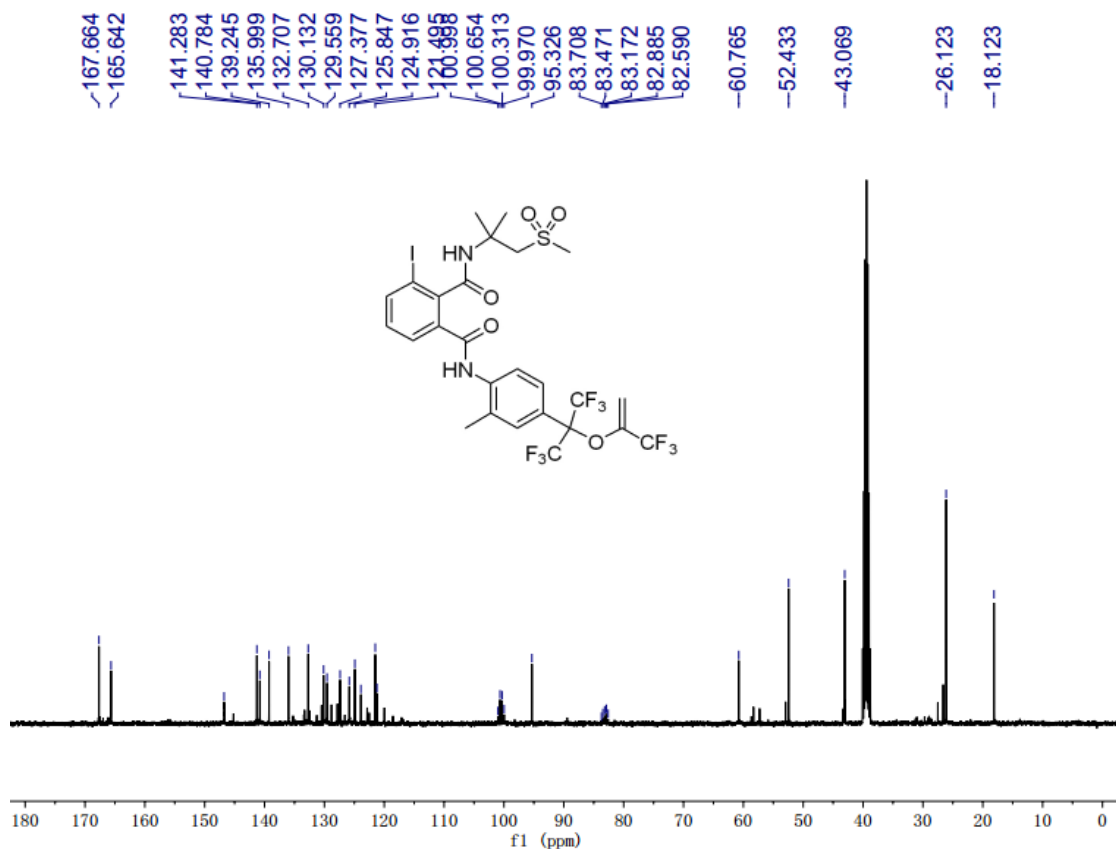

## <sup>19</sup>F NMR spectrum of 8k

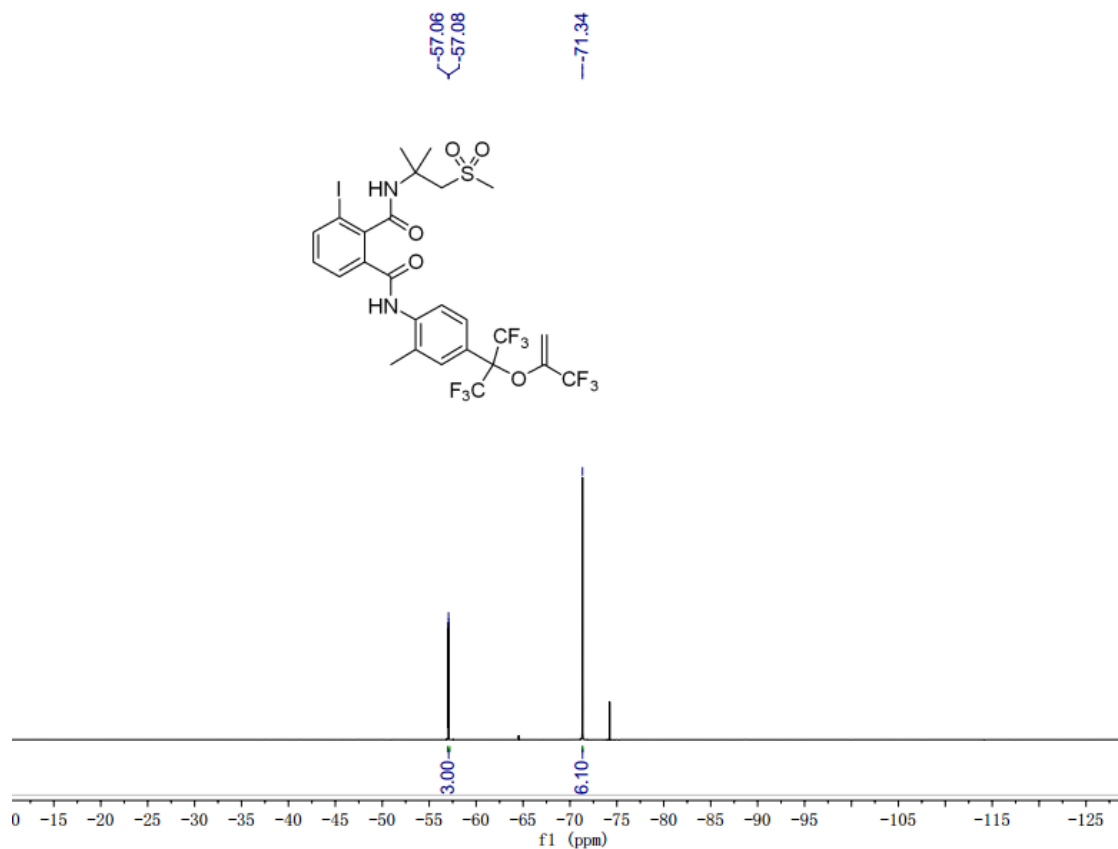

## HRMS (ESI) of 8k

20200511 270 (2.628) Cm (270-(539+540))

1: TOF MS ES+  
4.46e4

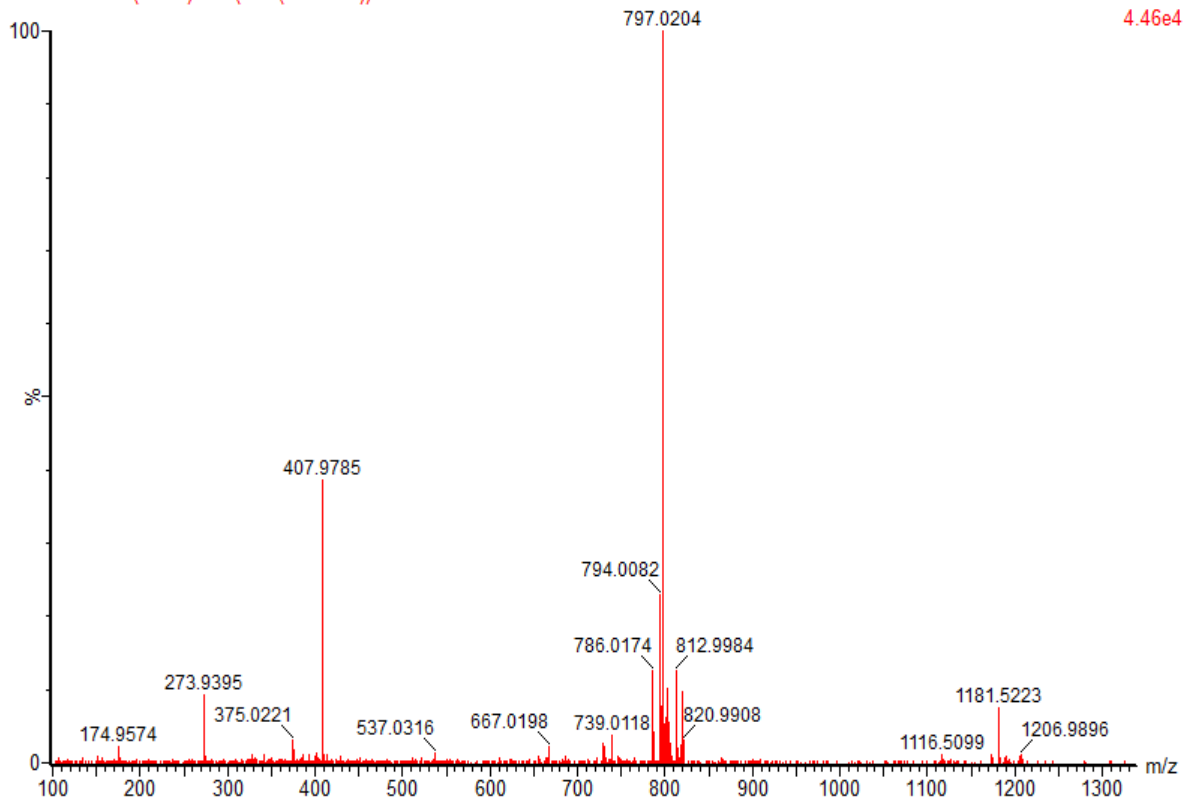

**<sup>1</sup>H NMR spectrum of 8l**

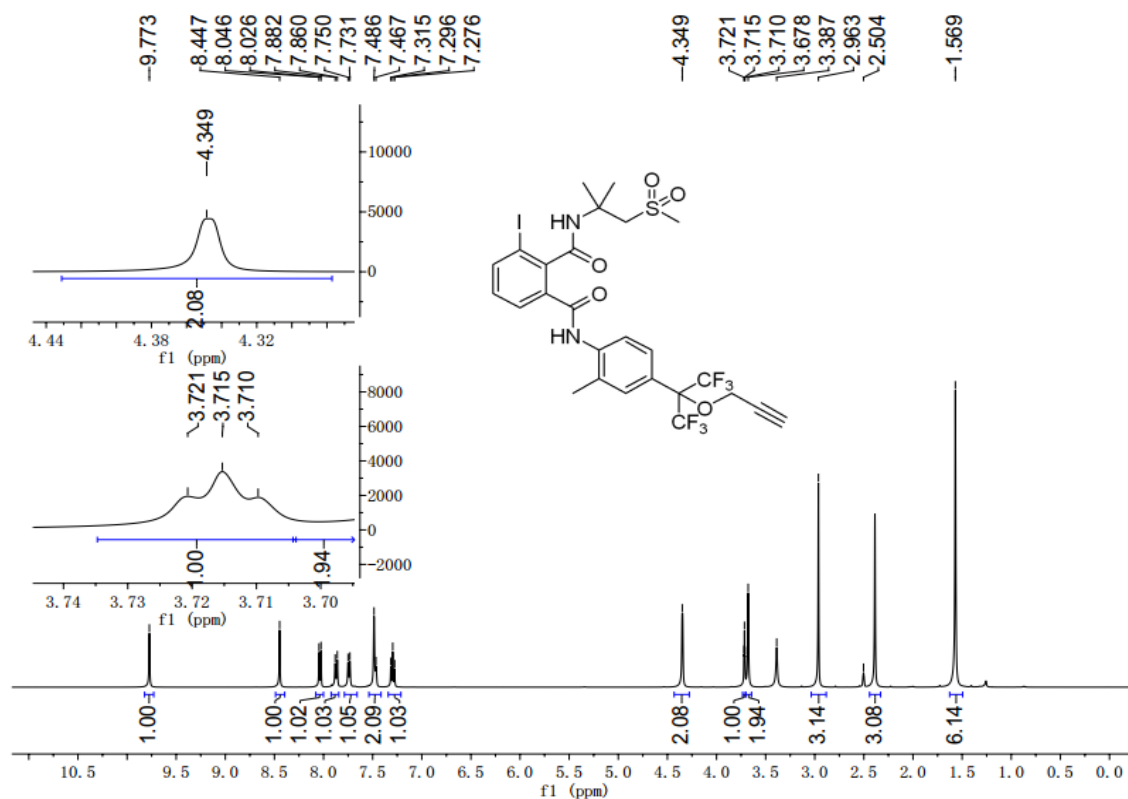

**<sup>13</sup>C NMR spectrum of 8l**

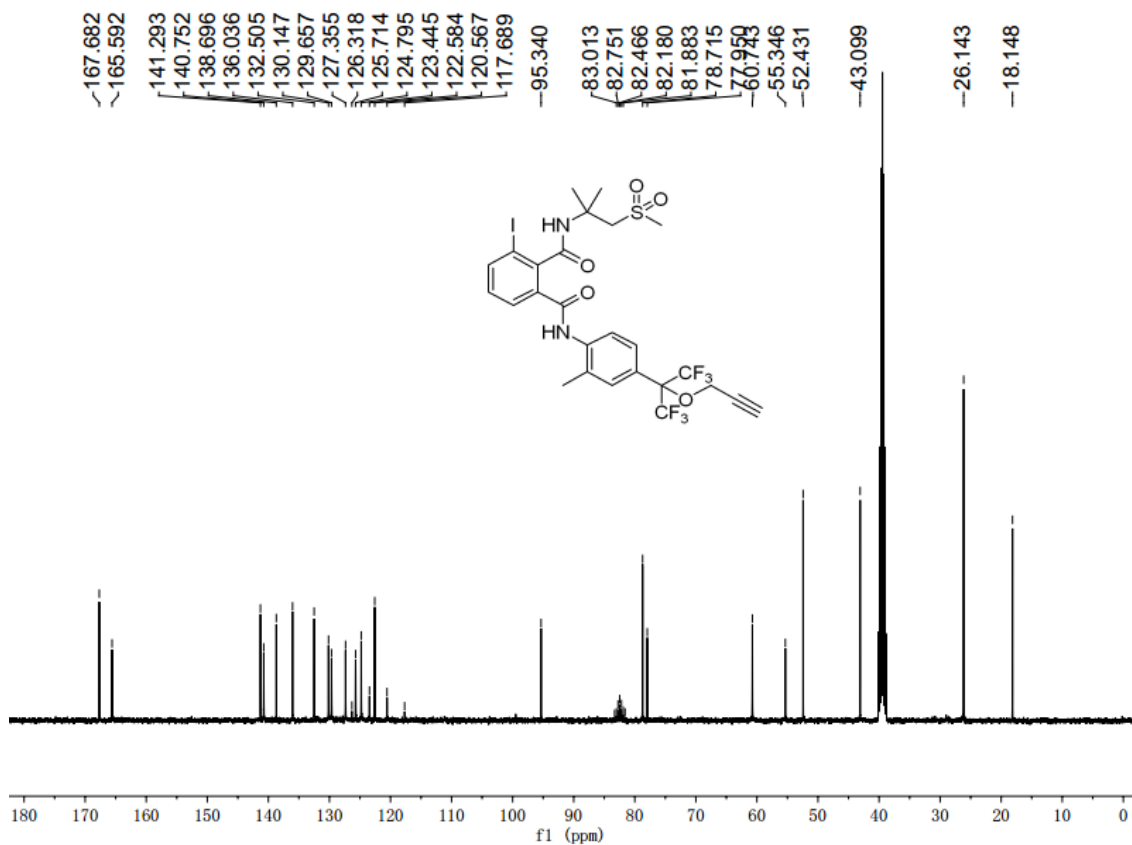

### <sup>19</sup>F NMR spectrum of 8l

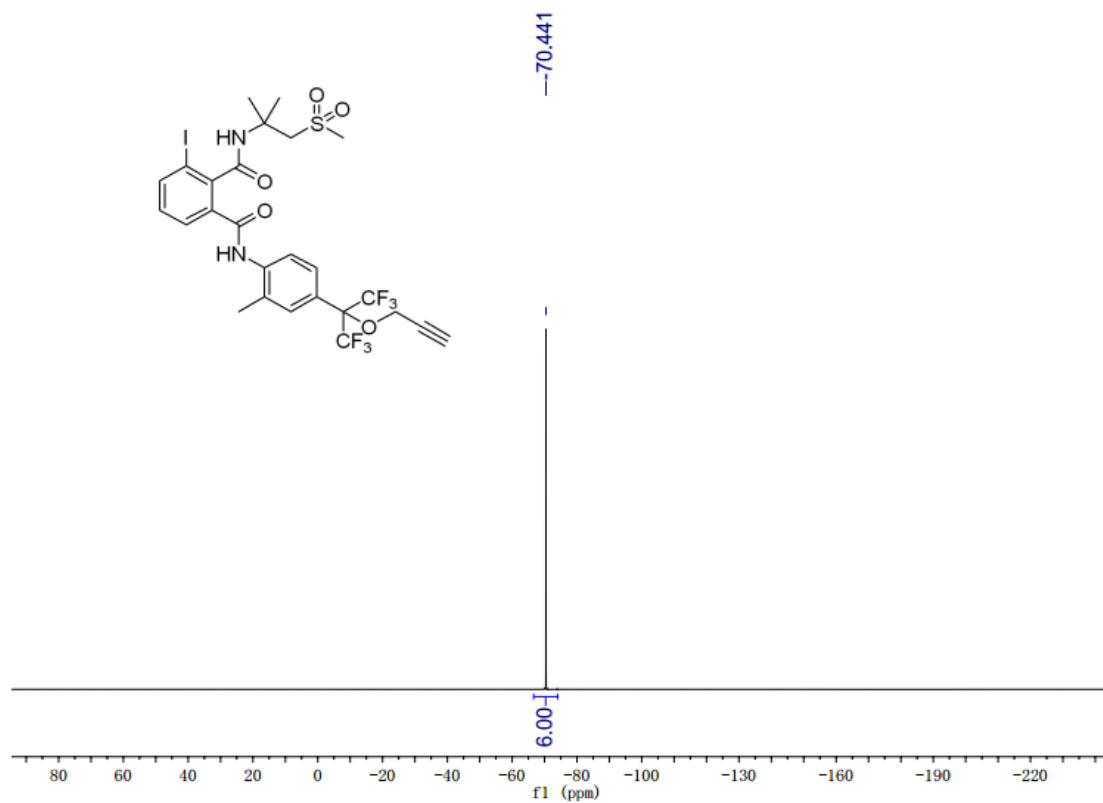

### HRMS (ESI) of 8l

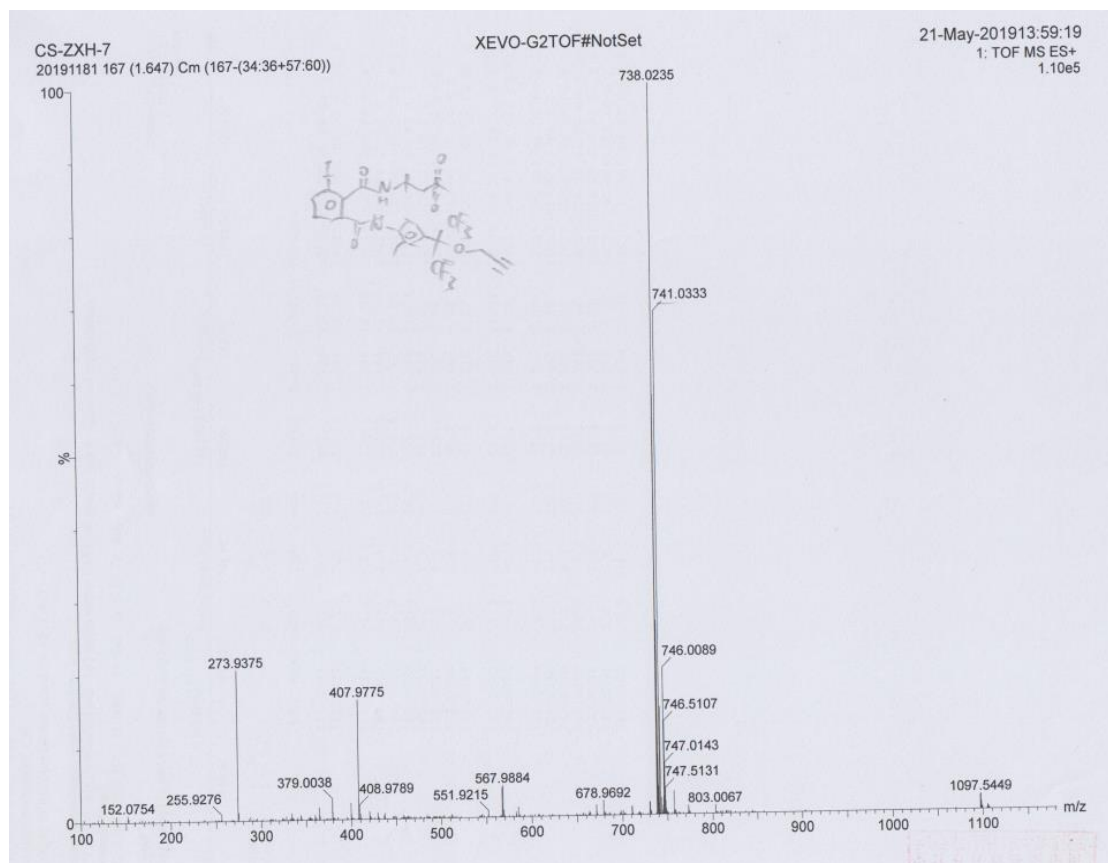

### $^1\text{H}$ NMR spectrum of 8m

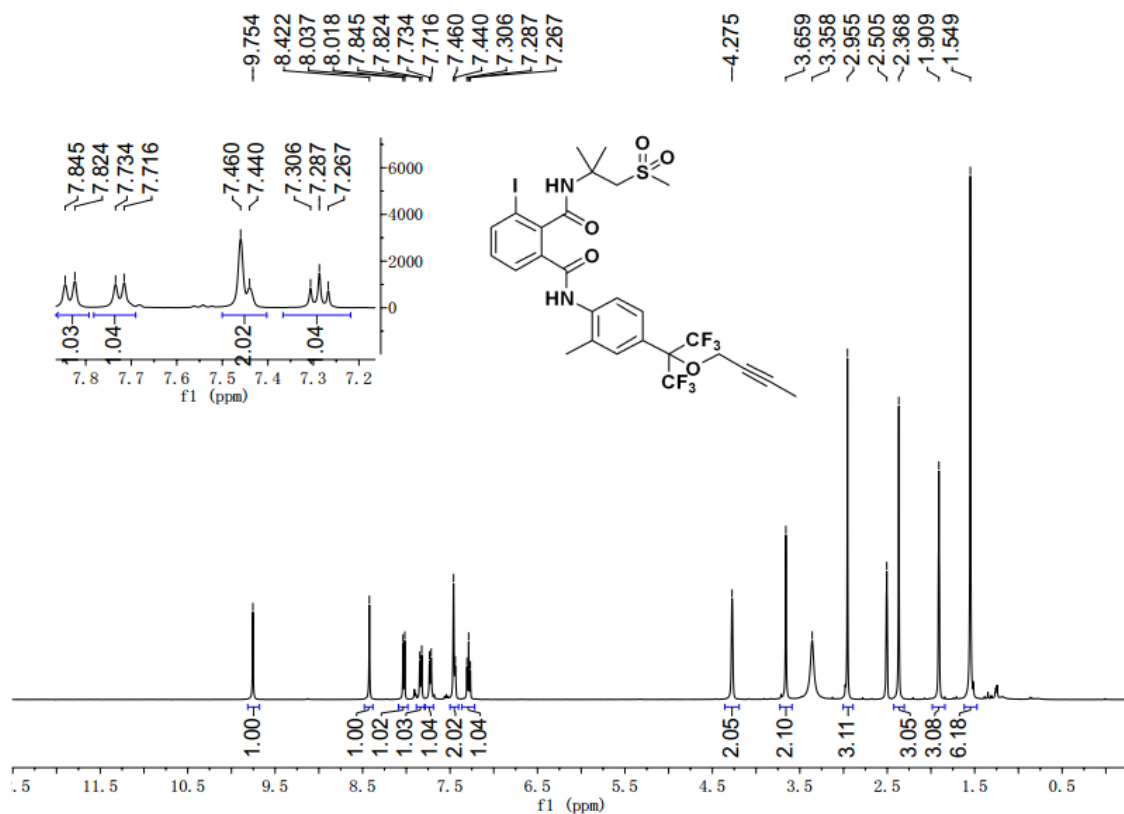

### $^{13}\text{C}$ NMR spectrum of 8m

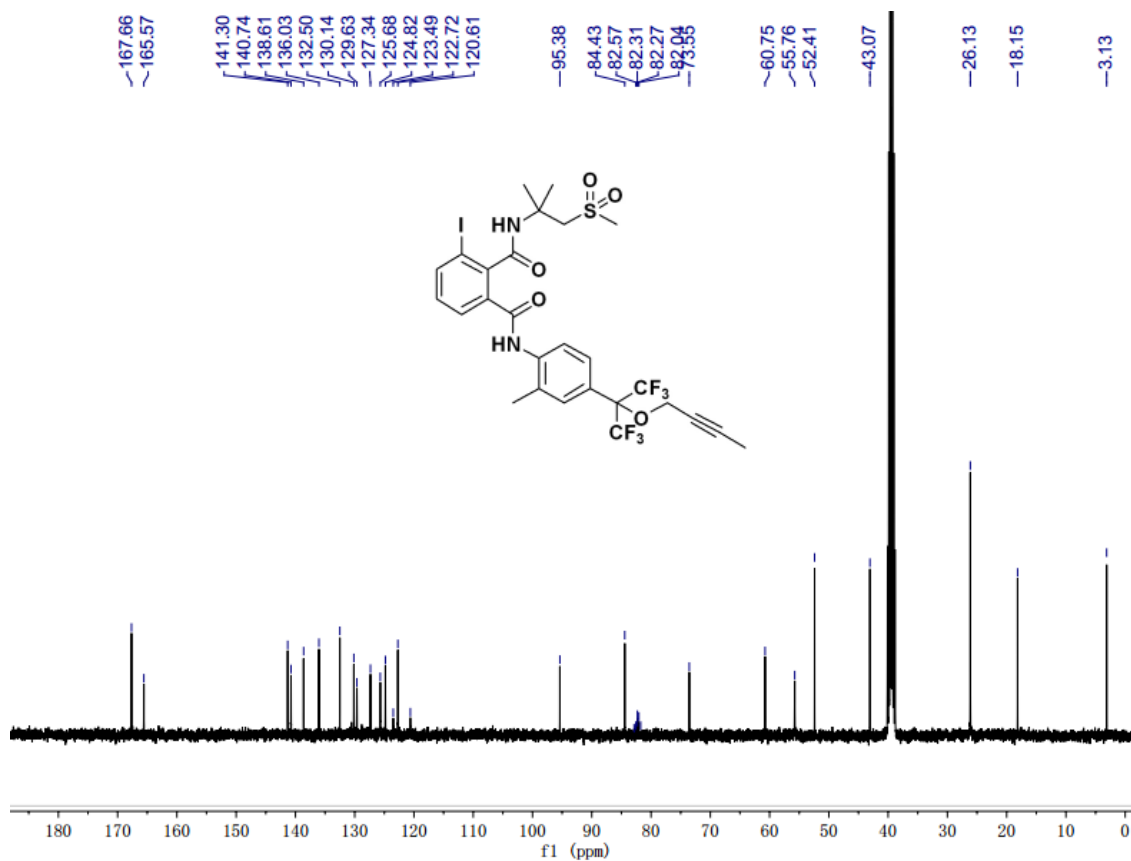



### <sup>19</sup>F NMR spectrum of 8m

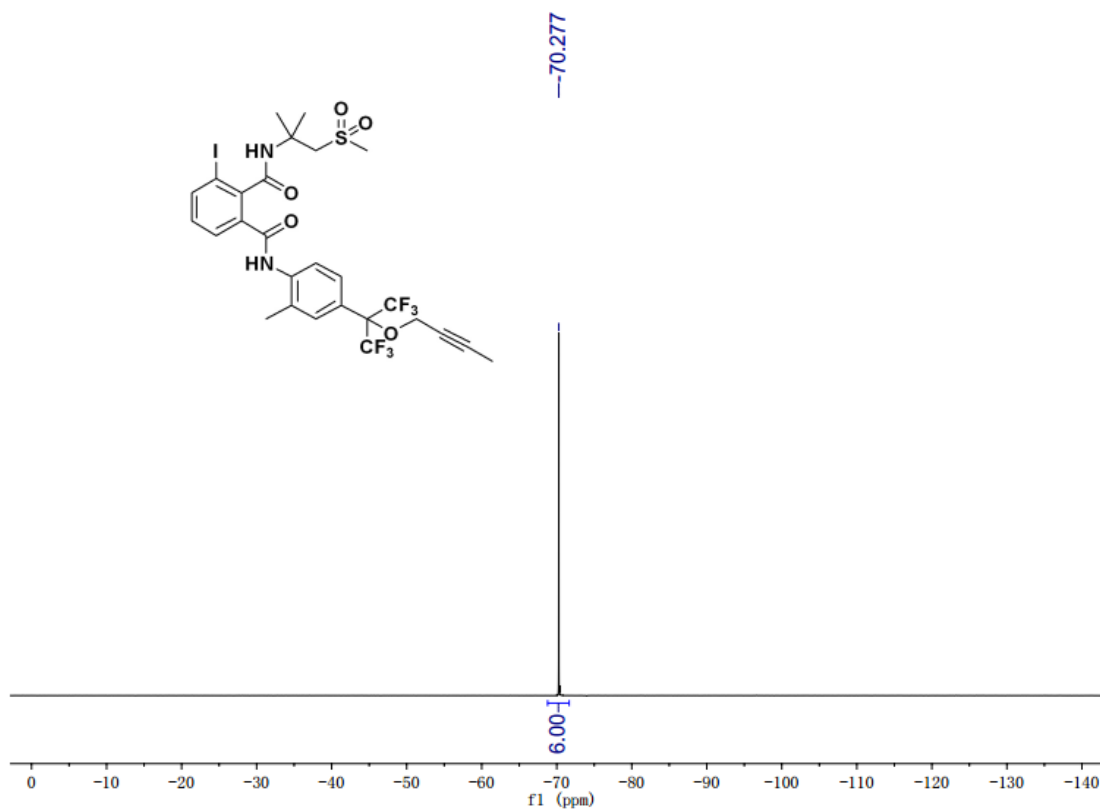

### HRMS (ESI) of 8m

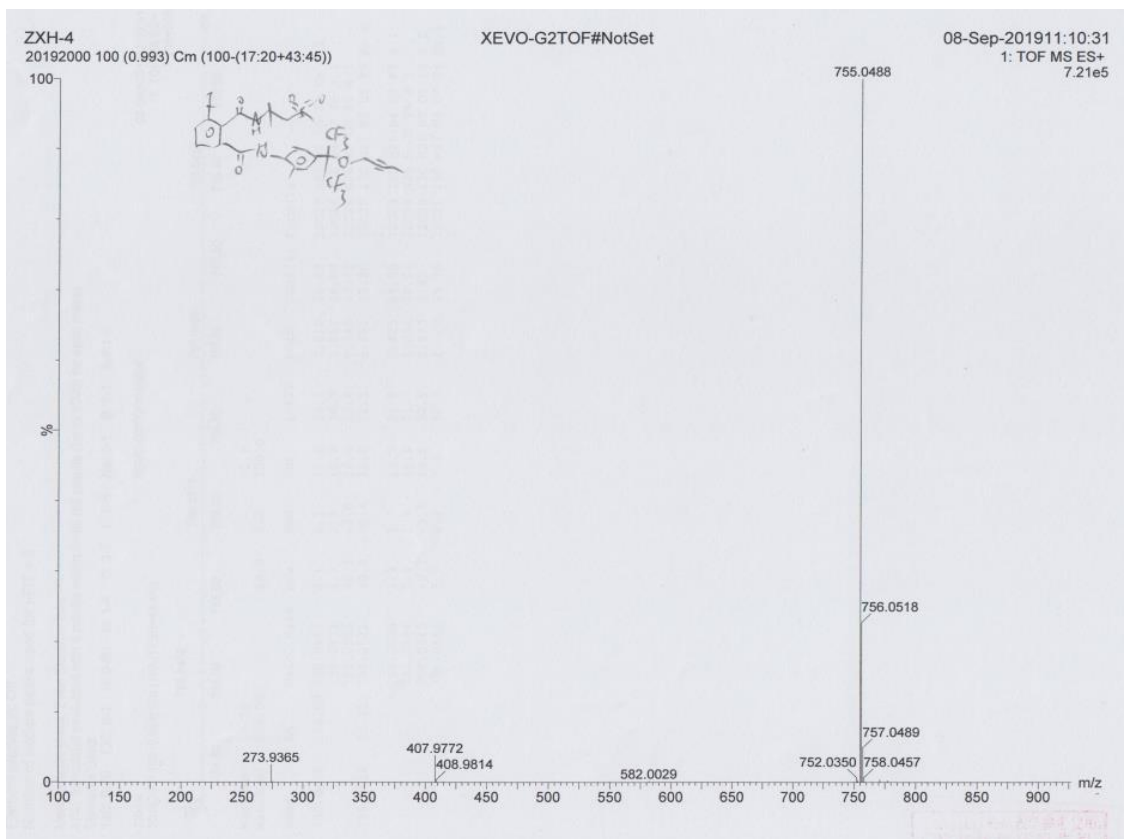

### <sup>1</sup>H NMR spectrum of 8n

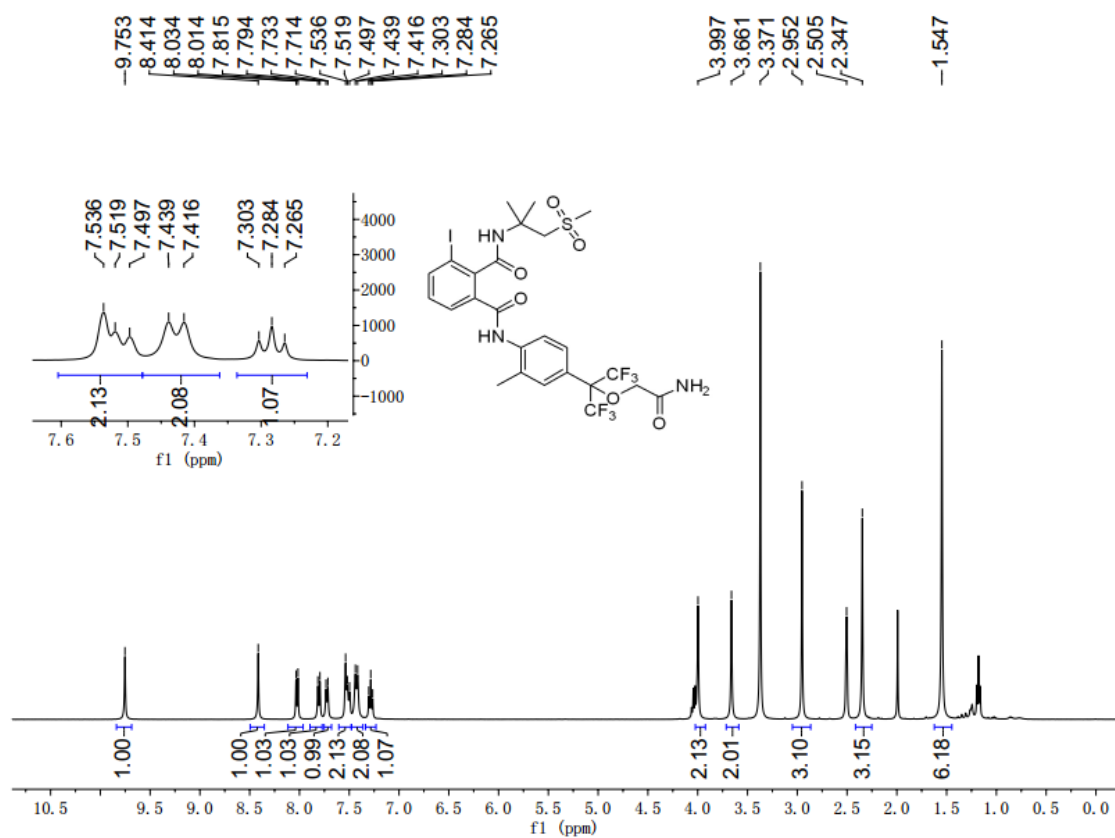

### <sup>13</sup>C NMR spectrum of 8n

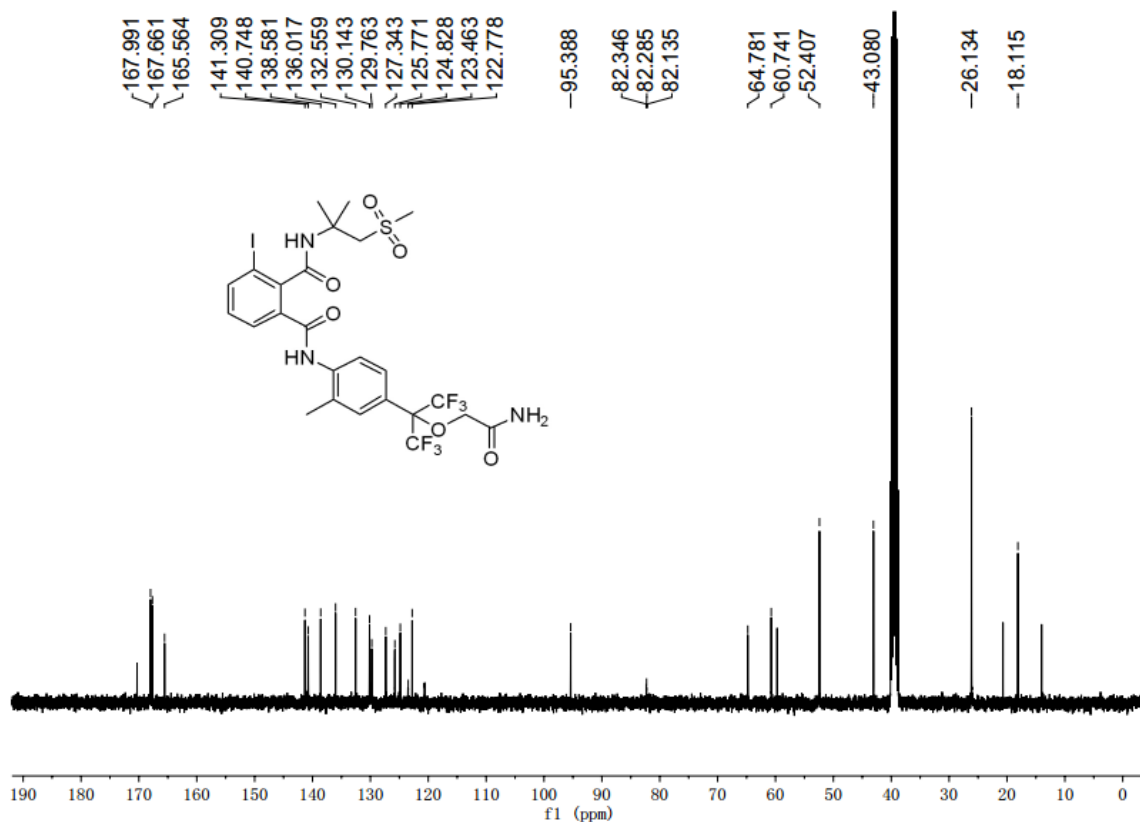

# <sup>19</sup>F NMR spectrum of 8n

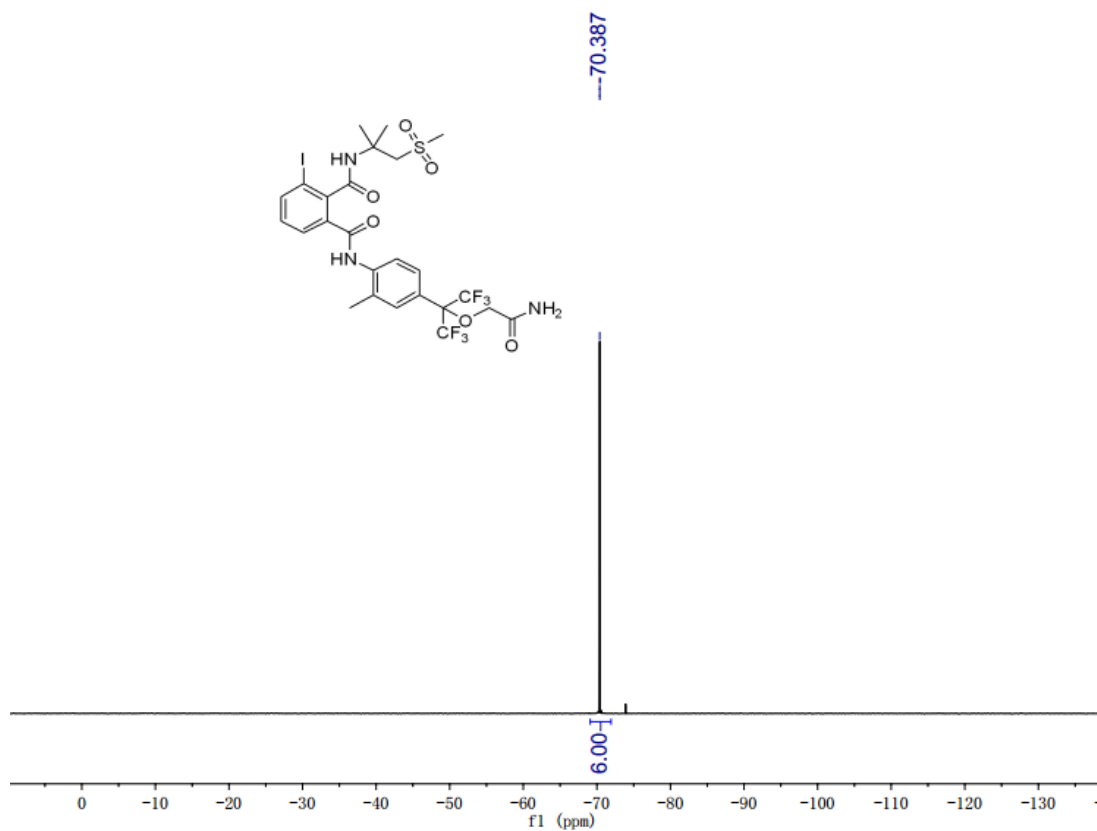

# HRMS (ESI) of 8n

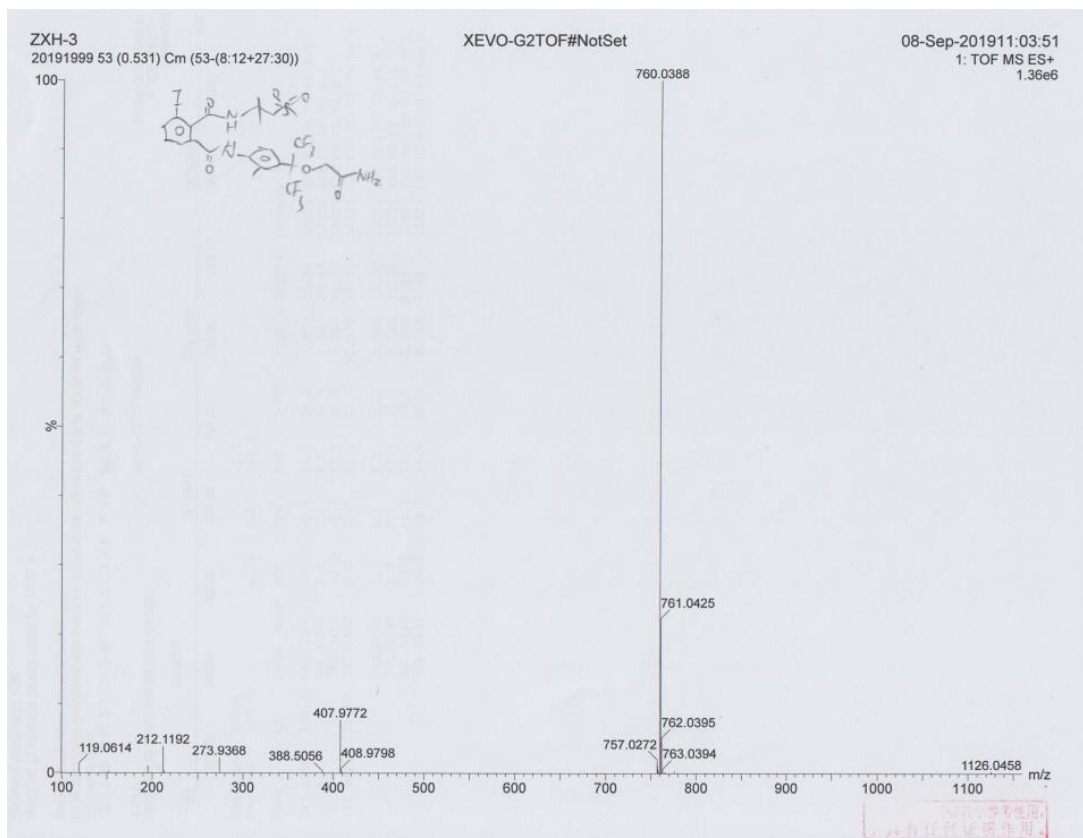

### <sup>1</sup>H NMR spectrum of 8o

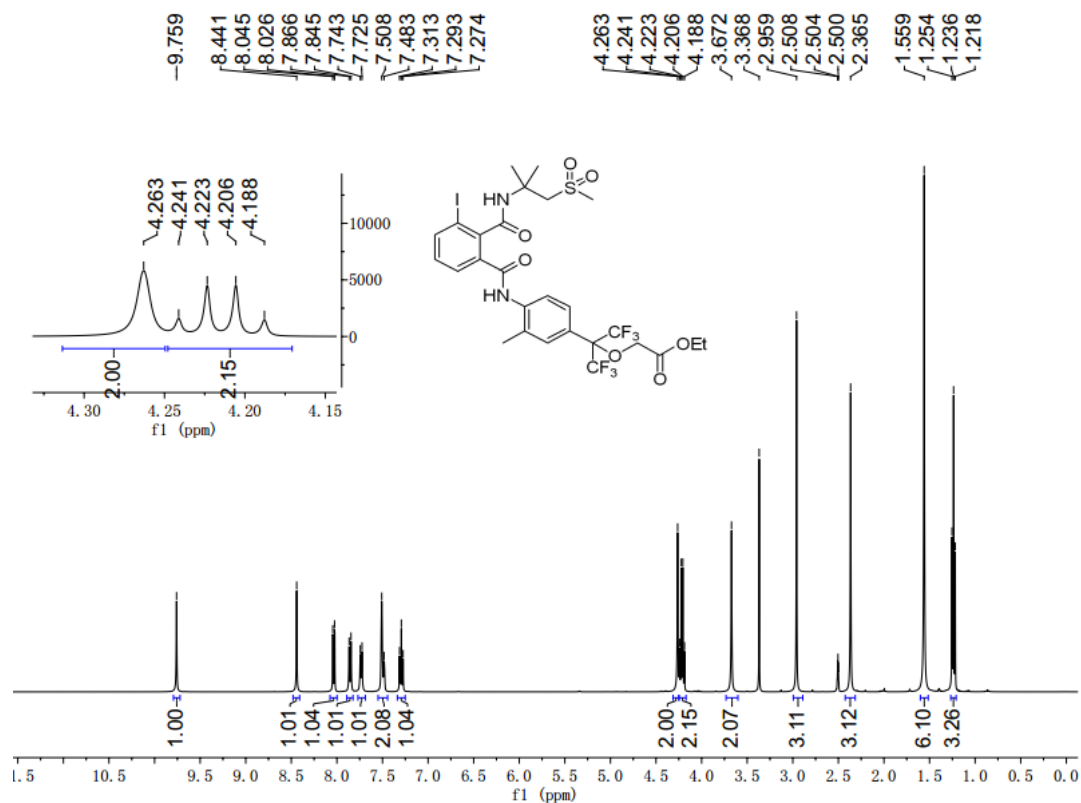

### <sup>13</sup>C NMR spectrum of 8o

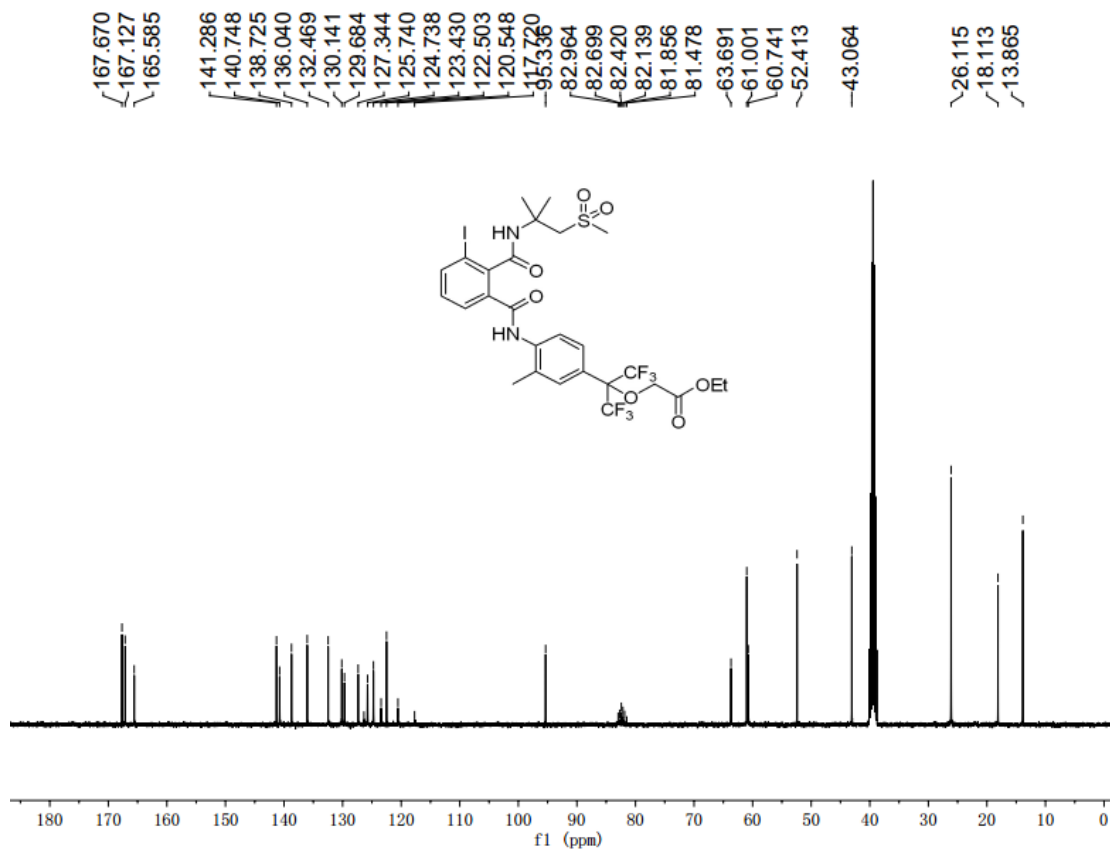

### <sup>19</sup>F NMR spectrum of 8o

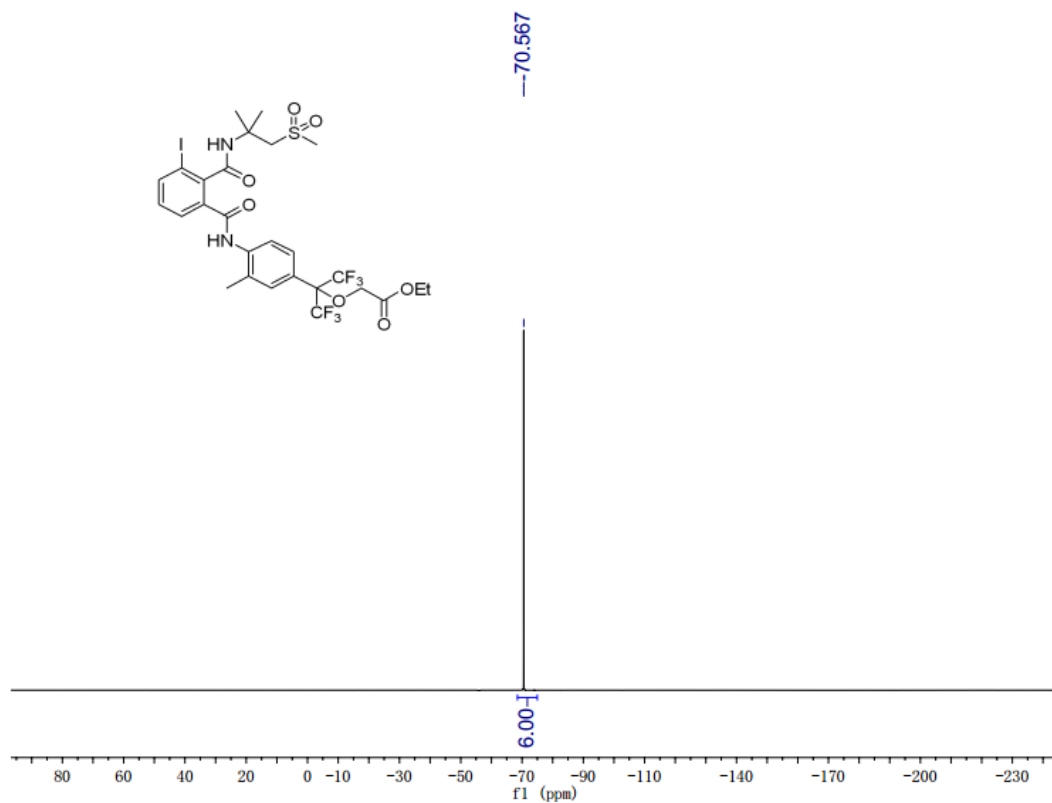

### HRMS (ESI) of 8o

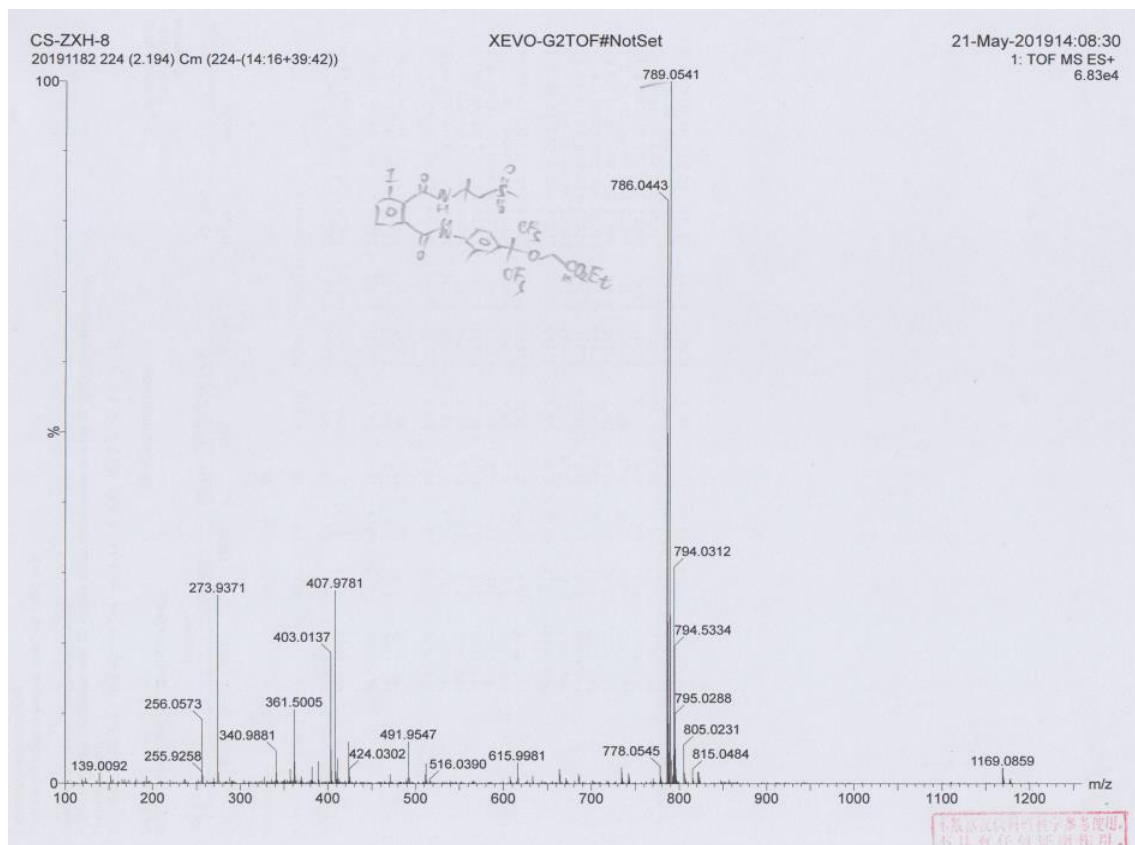

### <sup>1</sup>H NMR spectrum of 8p

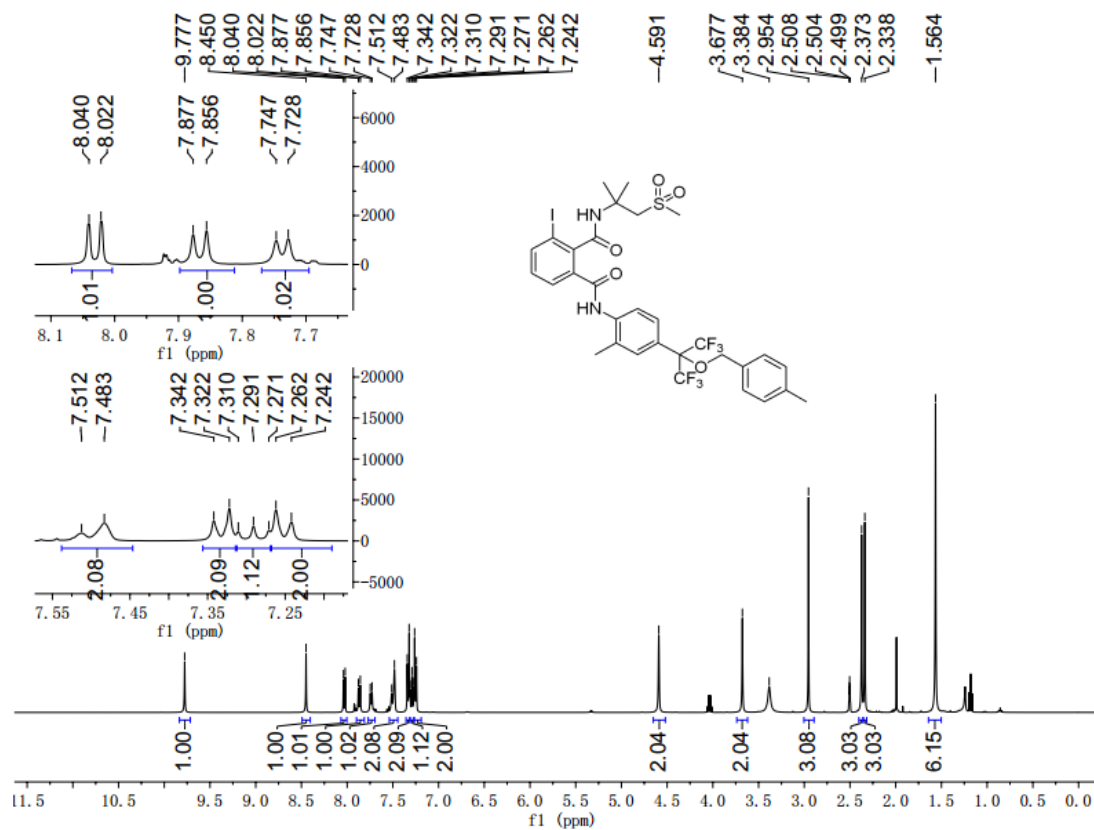

### <sup>13</sup>C NMR spectrum of 8p

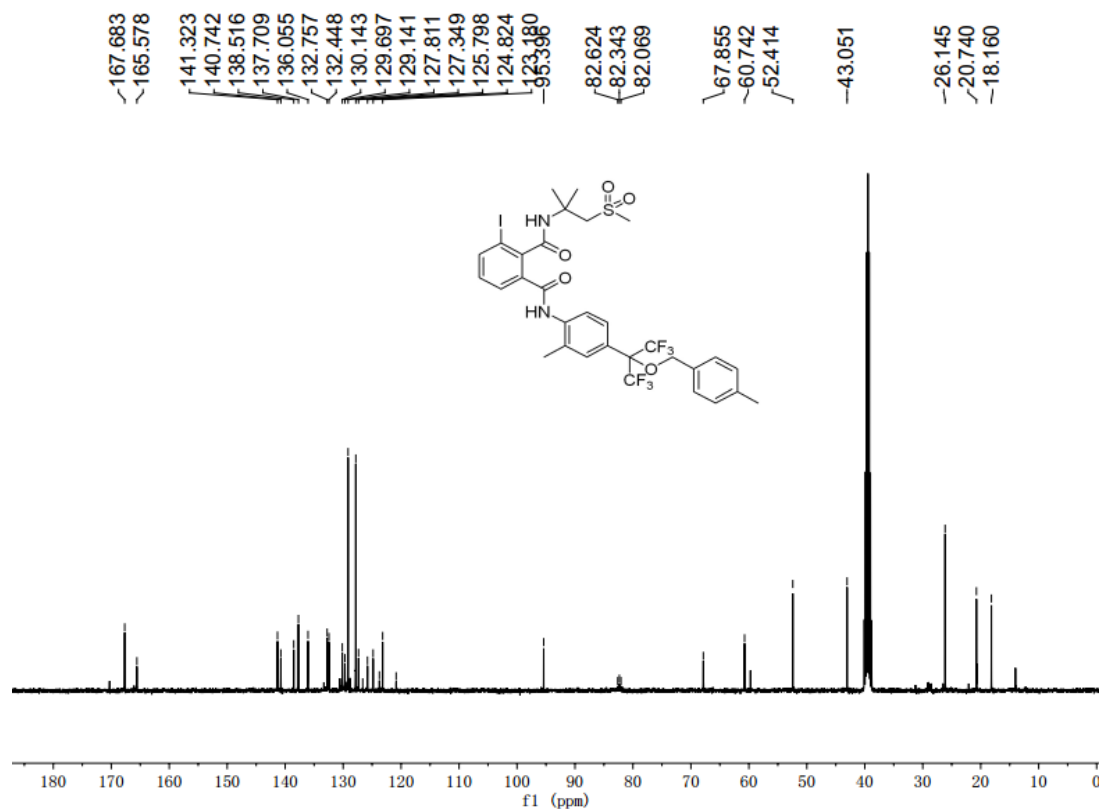

### <sup>19</sup>F NMR spectrum of 8p

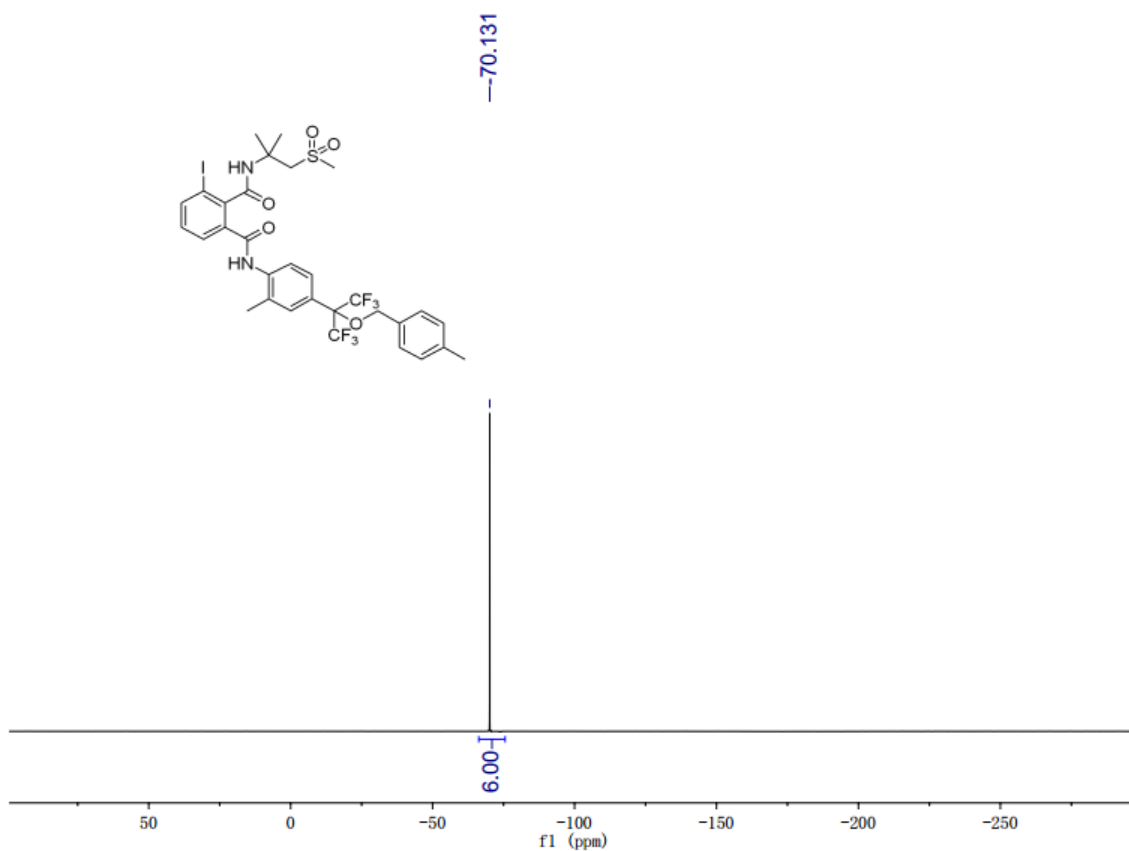

### HRMS (ESI) of 8p

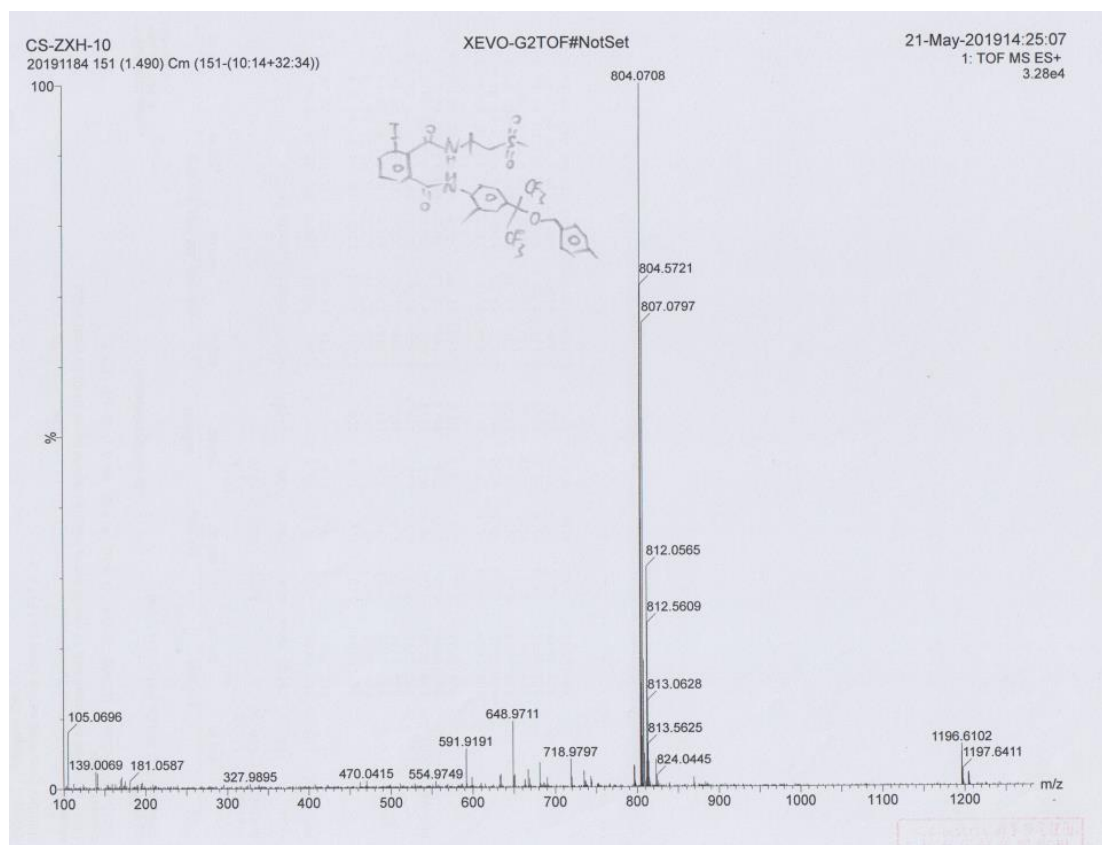

**<sup>1</sup>H NMR spectrum of 8q**

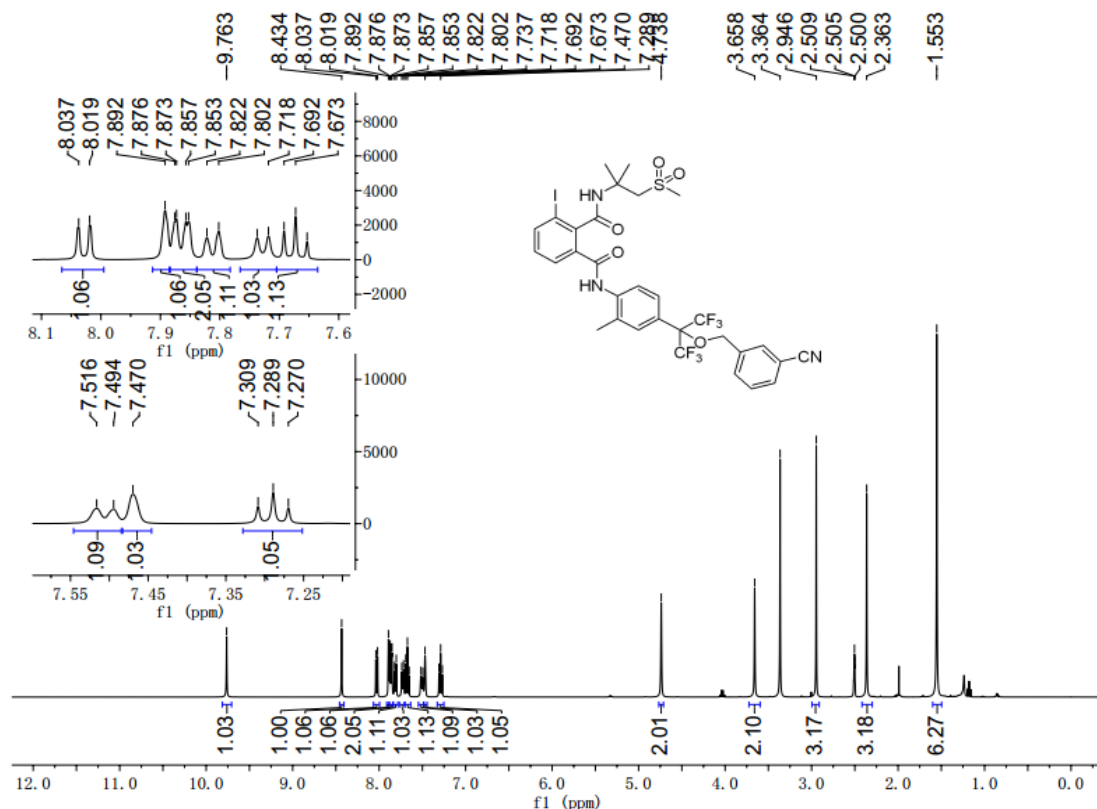

**<sup>13</sup>C NMR spectrum of 8q**

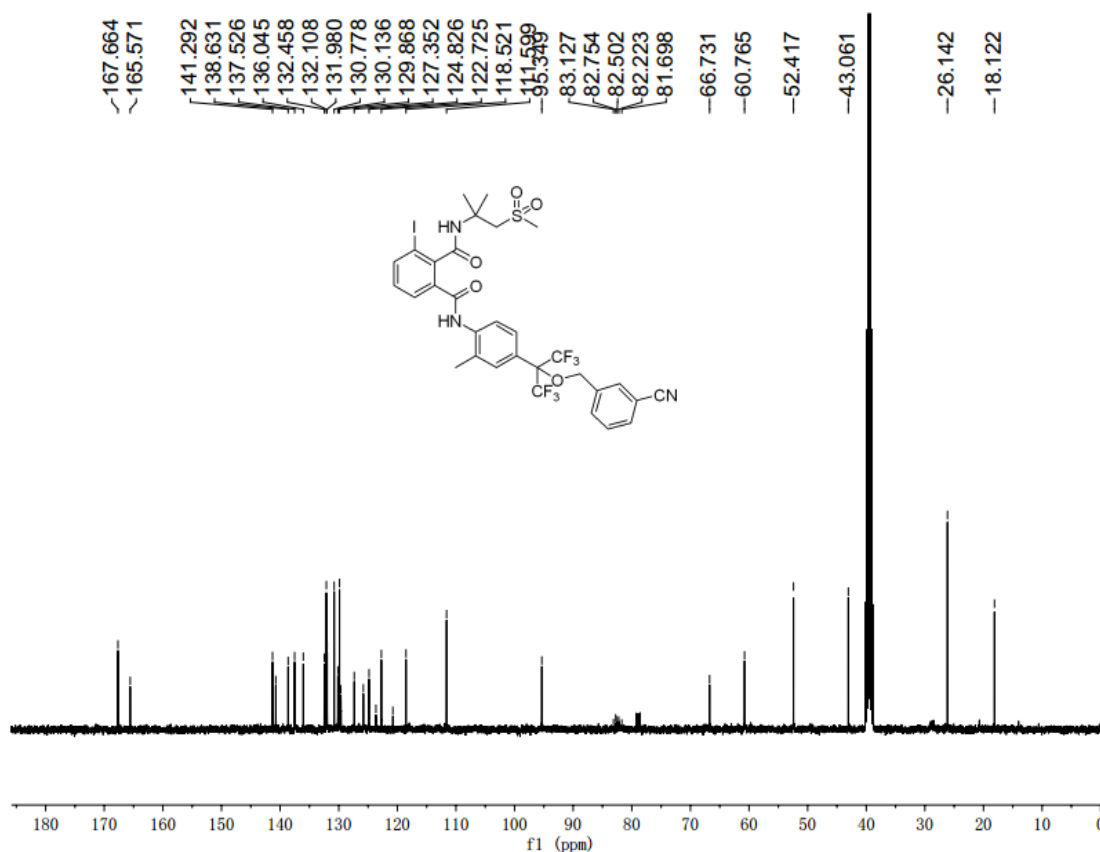



### $^{19}\text{F}$ NMR spectrum of 8q

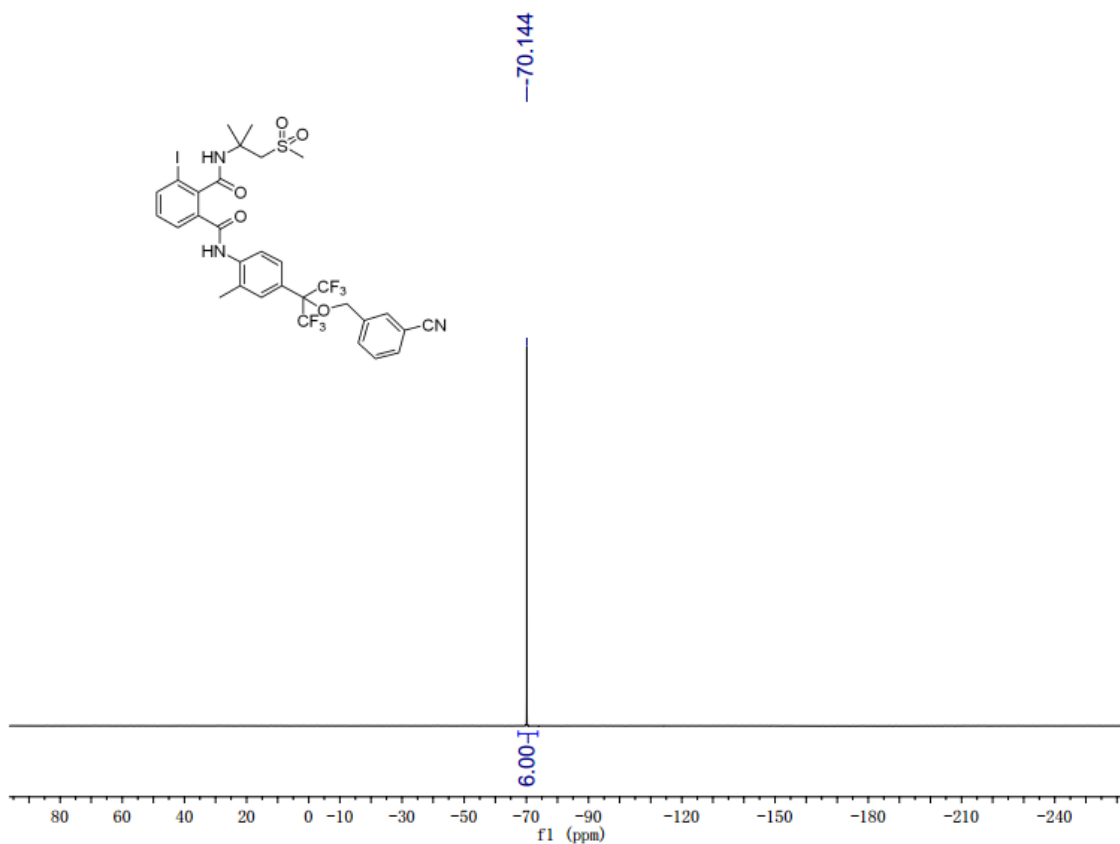

### HRMS (ESI) of 8q

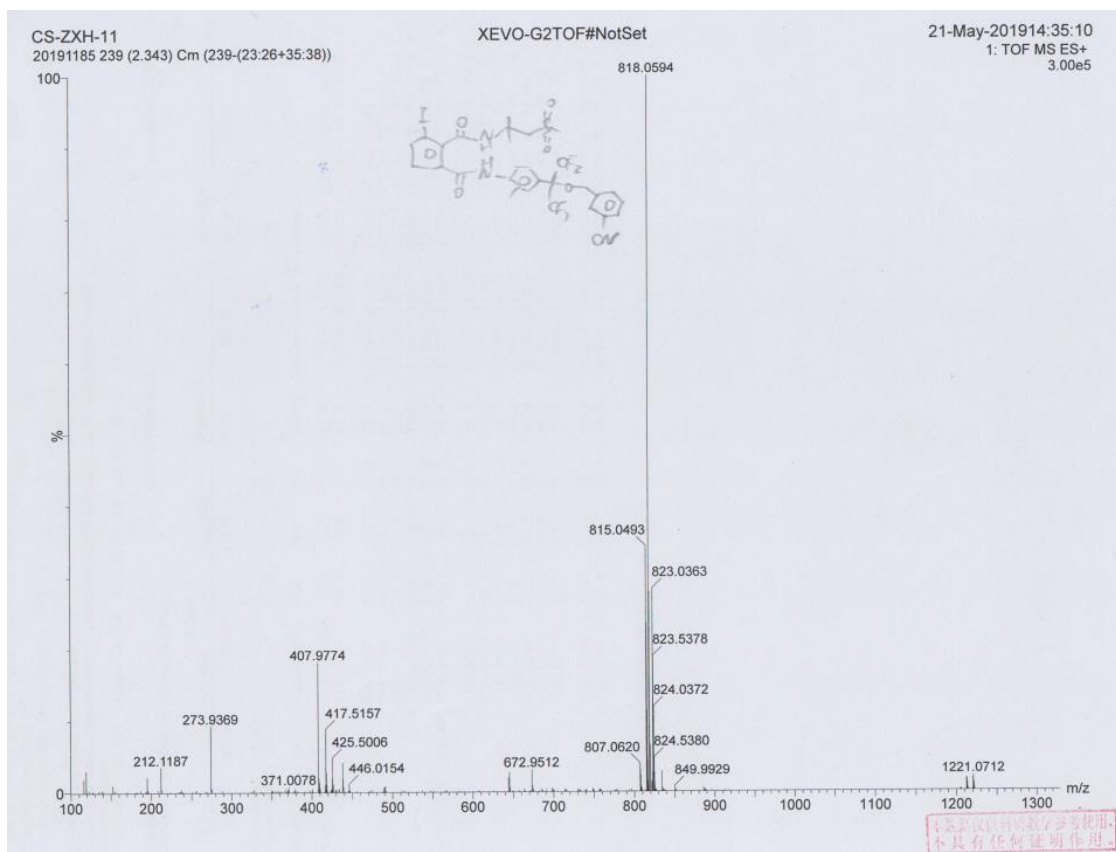

### <sup>1</sup>H NMR spectrum of 8a'

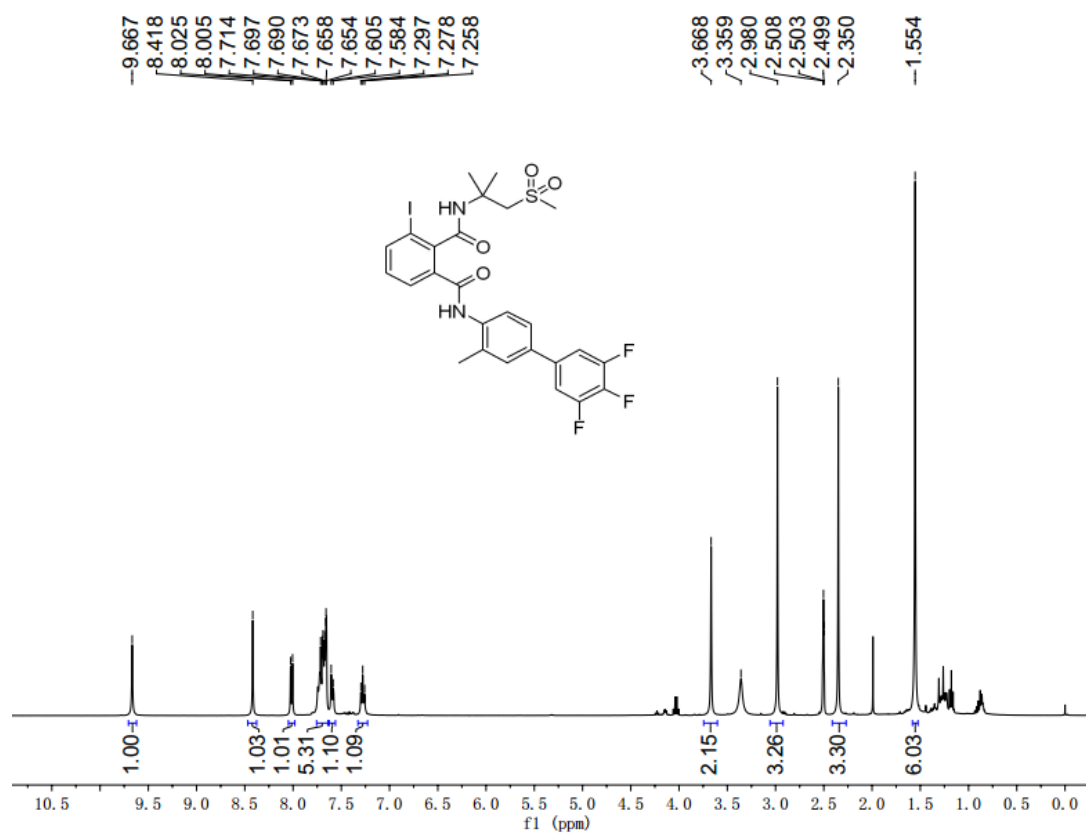

### <sup>13</sup>C NMR spectrum of 8a'

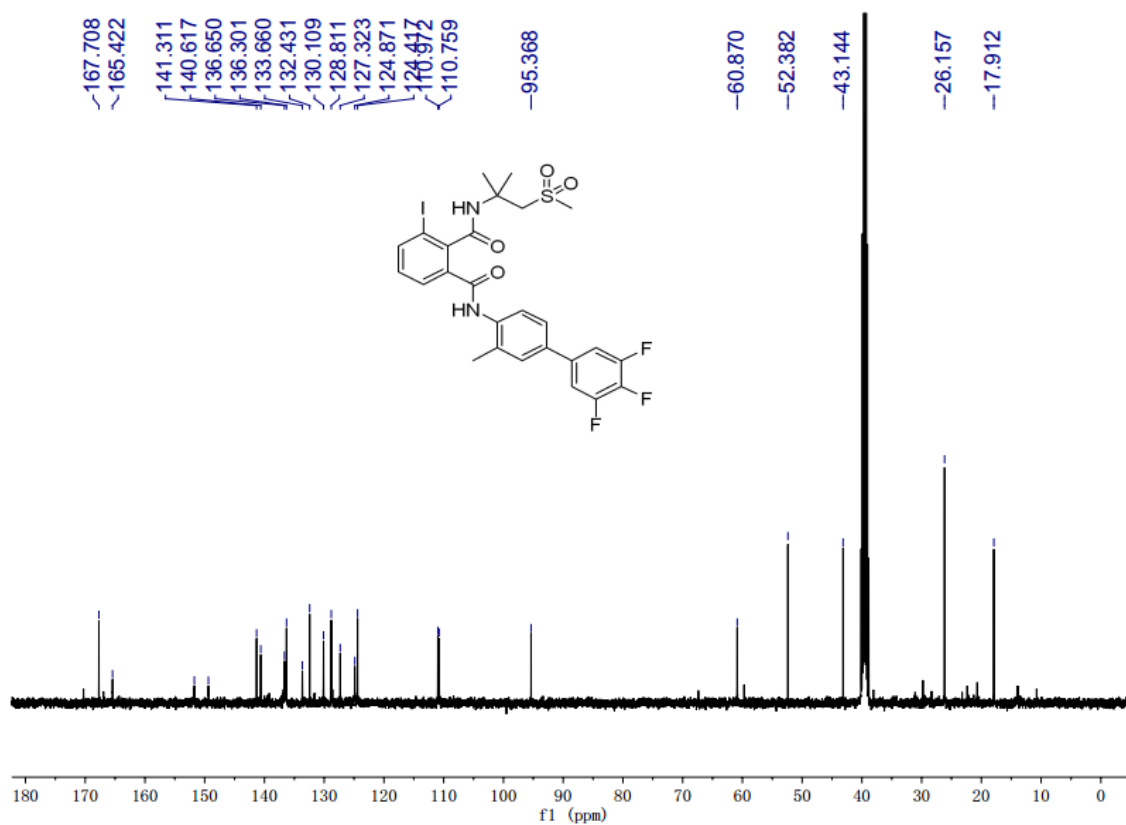

### <sup>19</sup>F NMR spectrum of 8a'

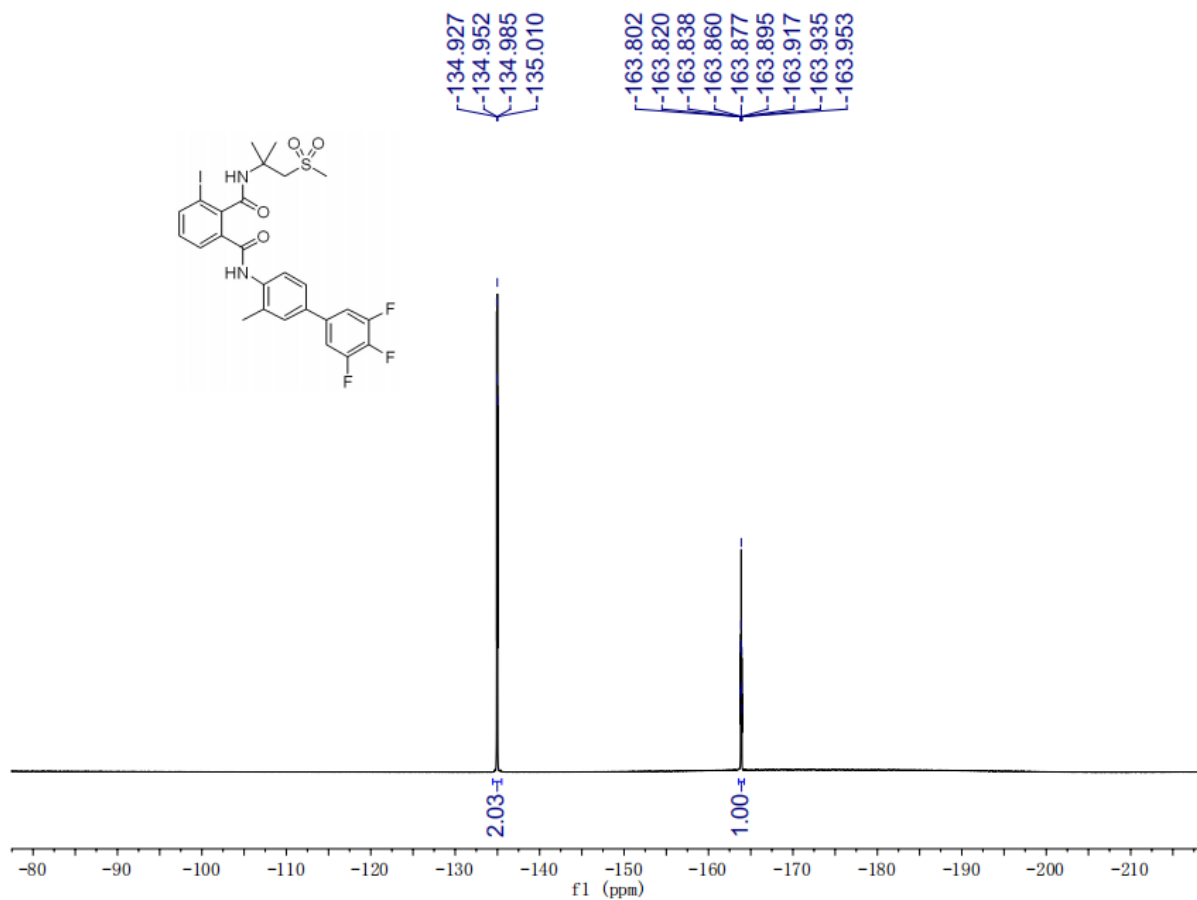

### HRMS (ESI) of 8a'

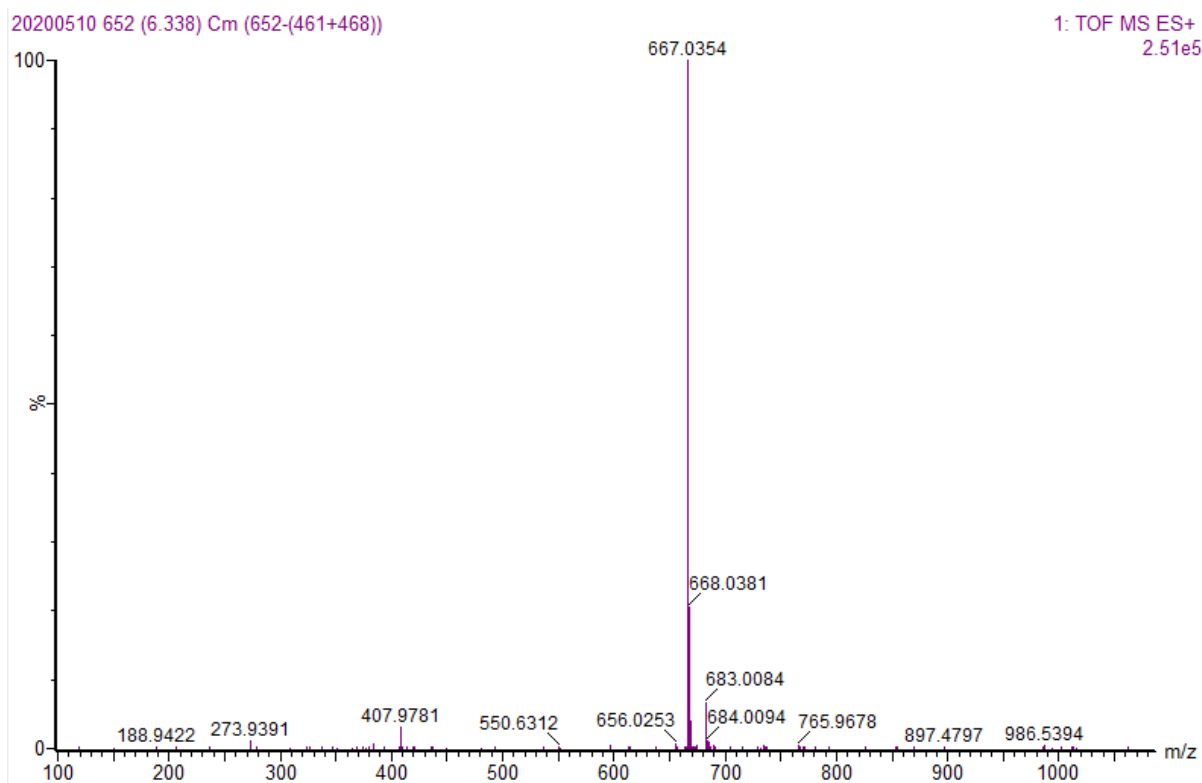

### <sup>1</sup>H NMR spectrum of 8b'

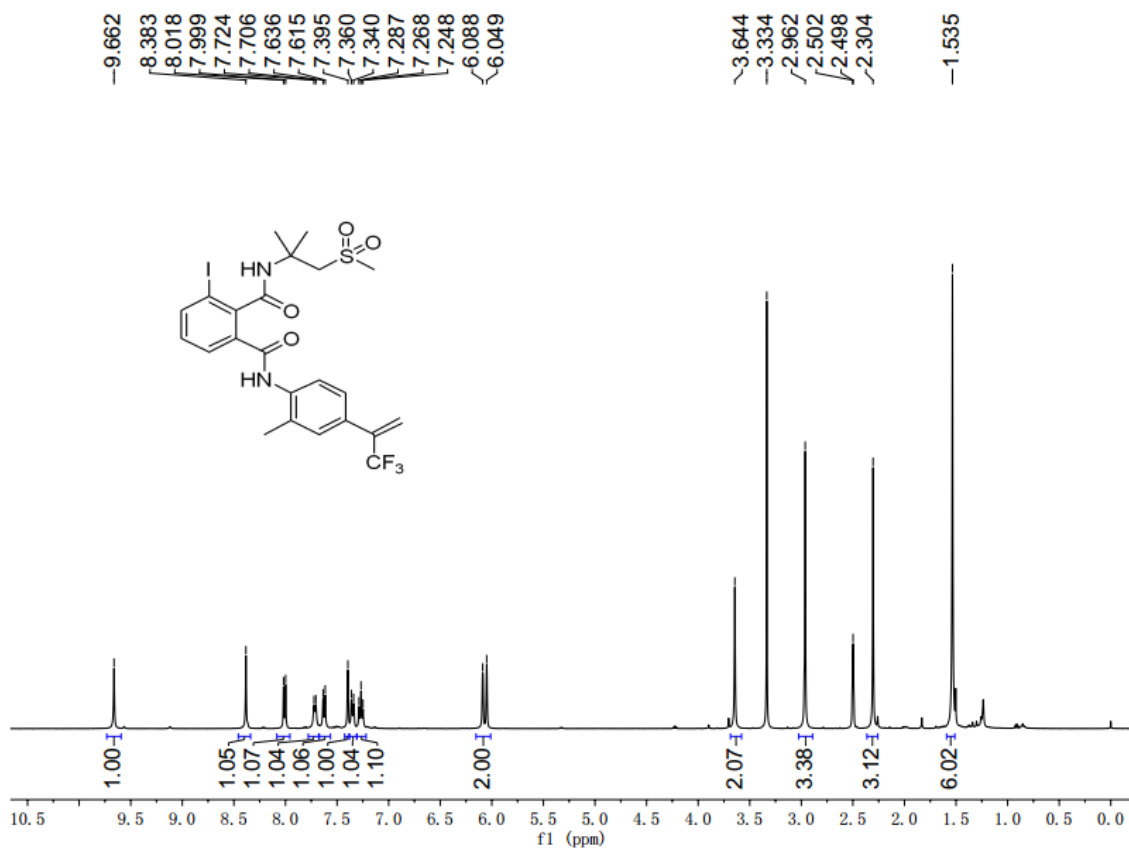

### <sup>13</sup>C NMR spectrum of 8b'

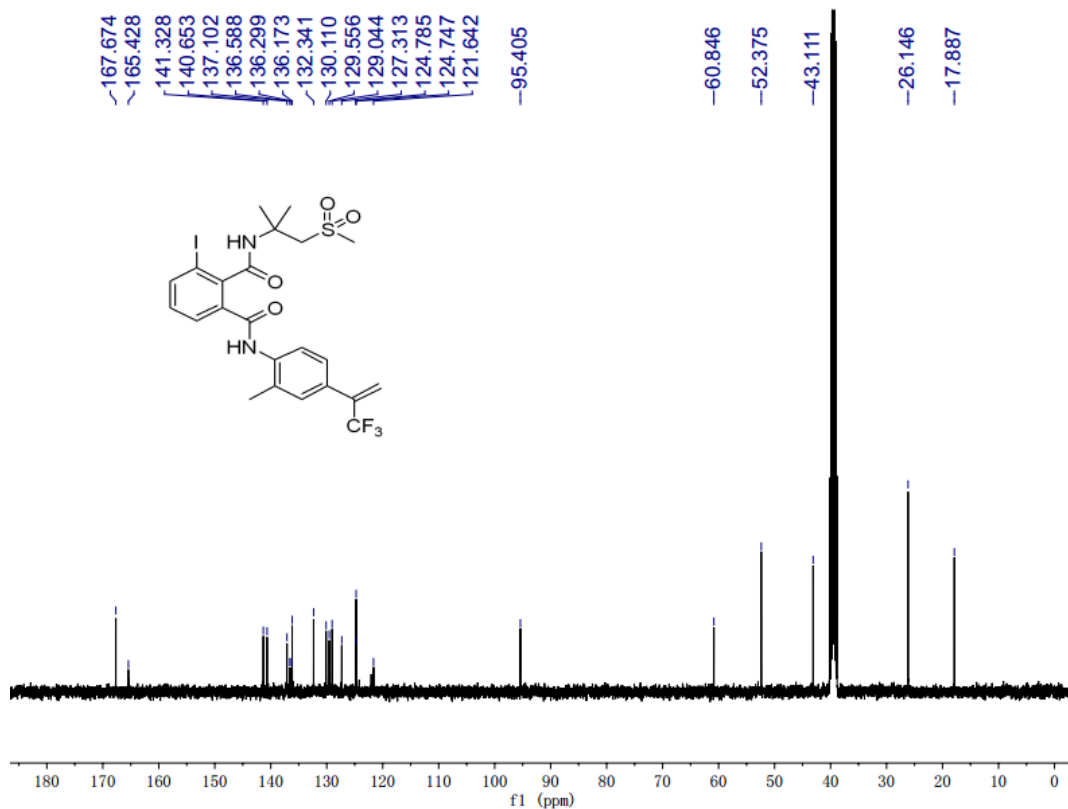

### <sup>19</sup>F NMR spectrum of 8b'

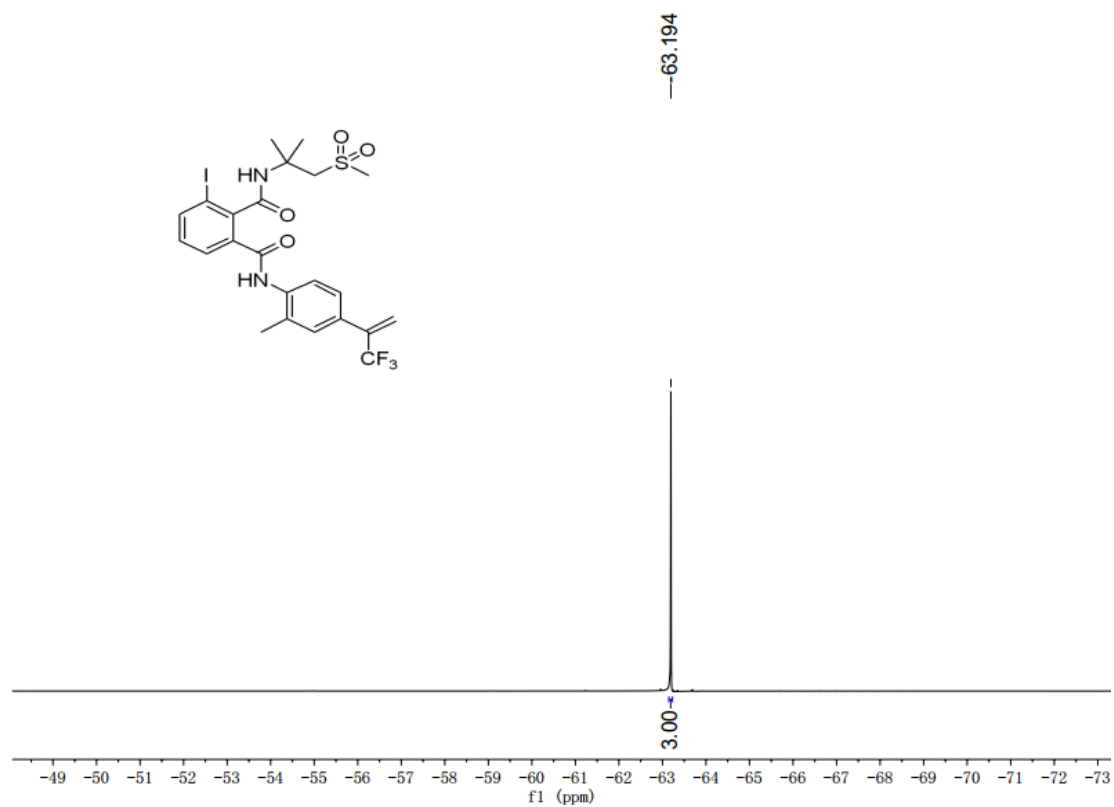

### HRMS (ESI) of 8b'

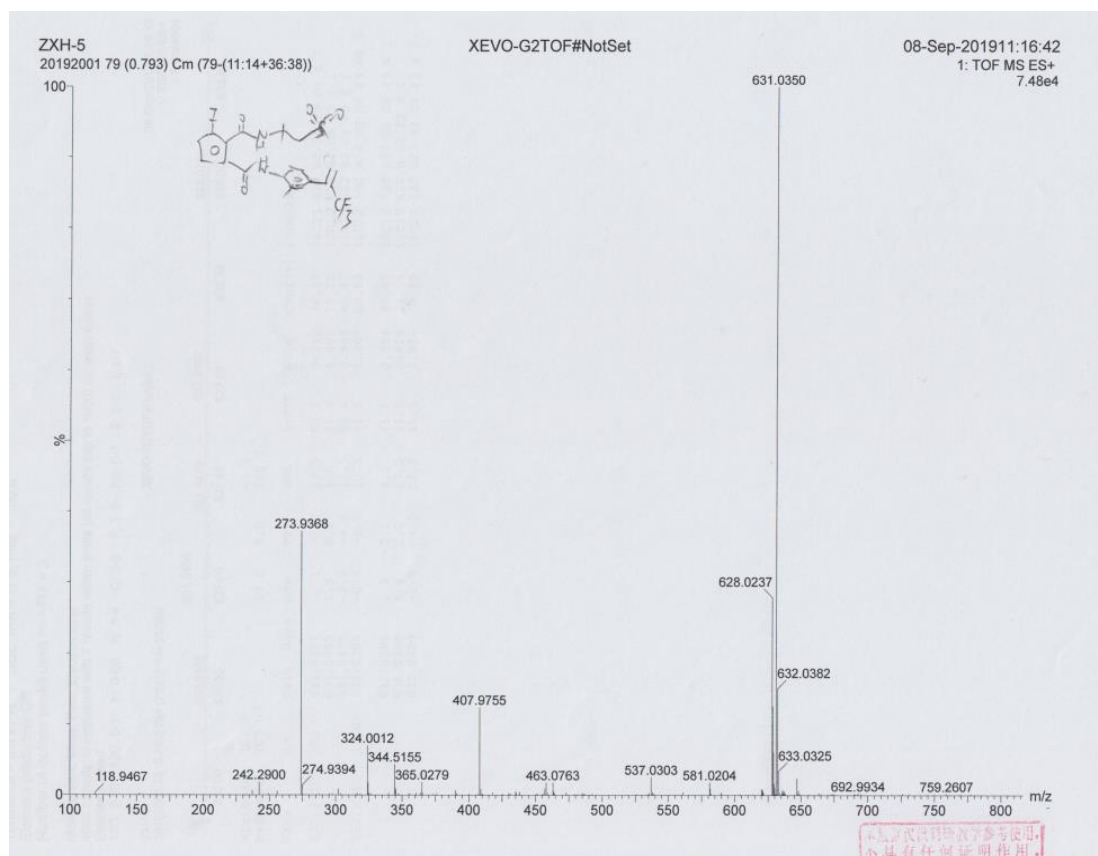

**<sup>1</sup>H NMR spectrum of 8c'**

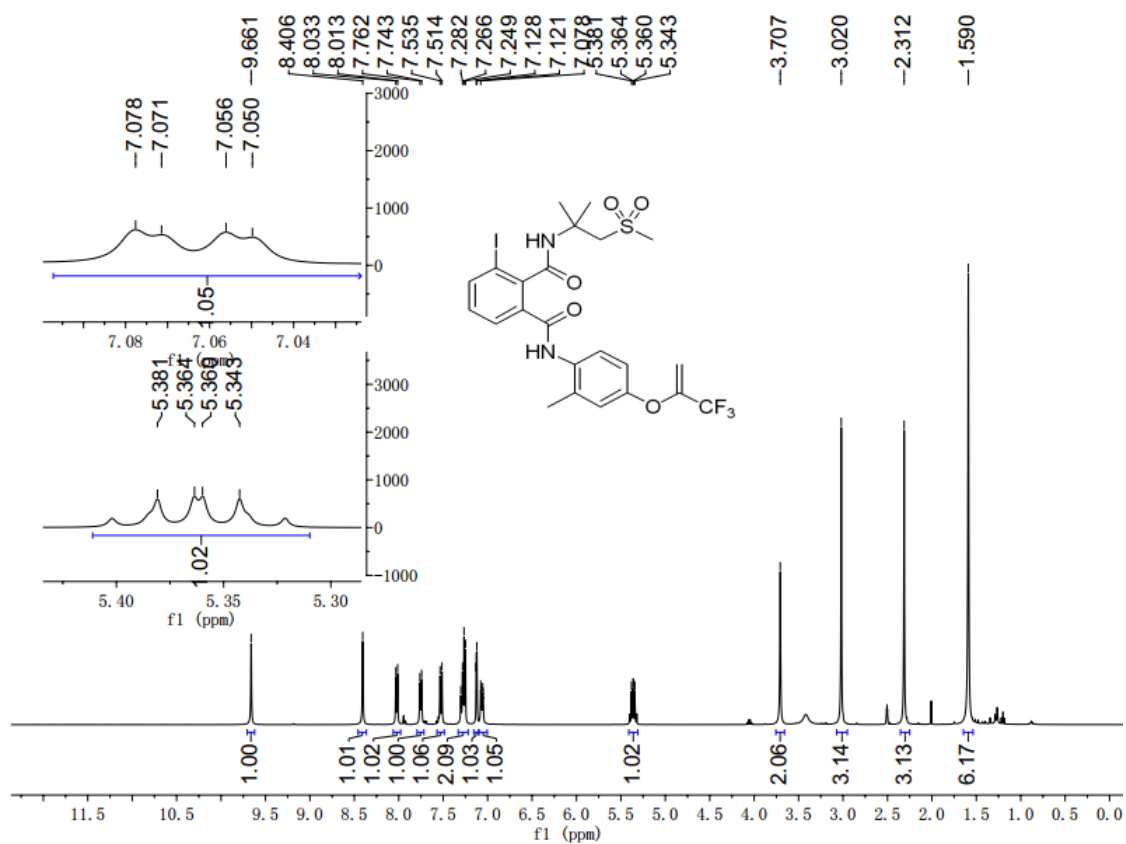

**<sup>13</sup>C NMR spectrum of 8c'**

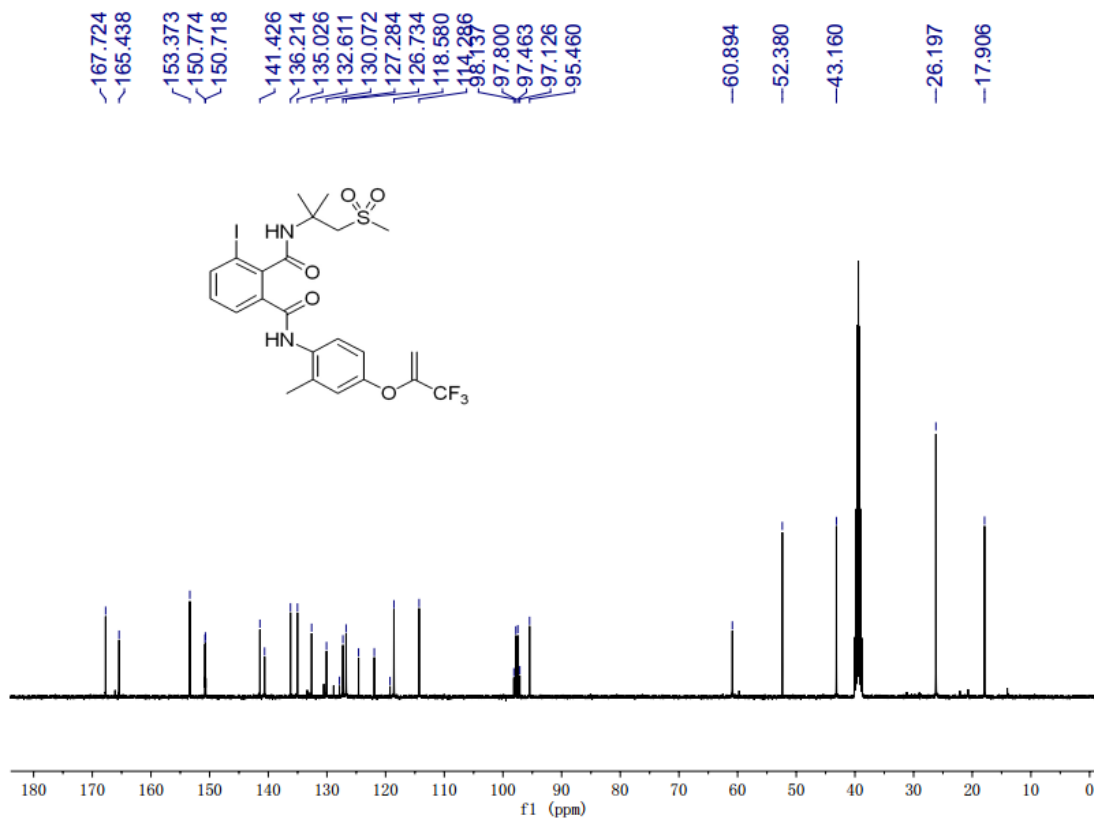

### <sup>19</sup>F NMR spectrum of 8c'

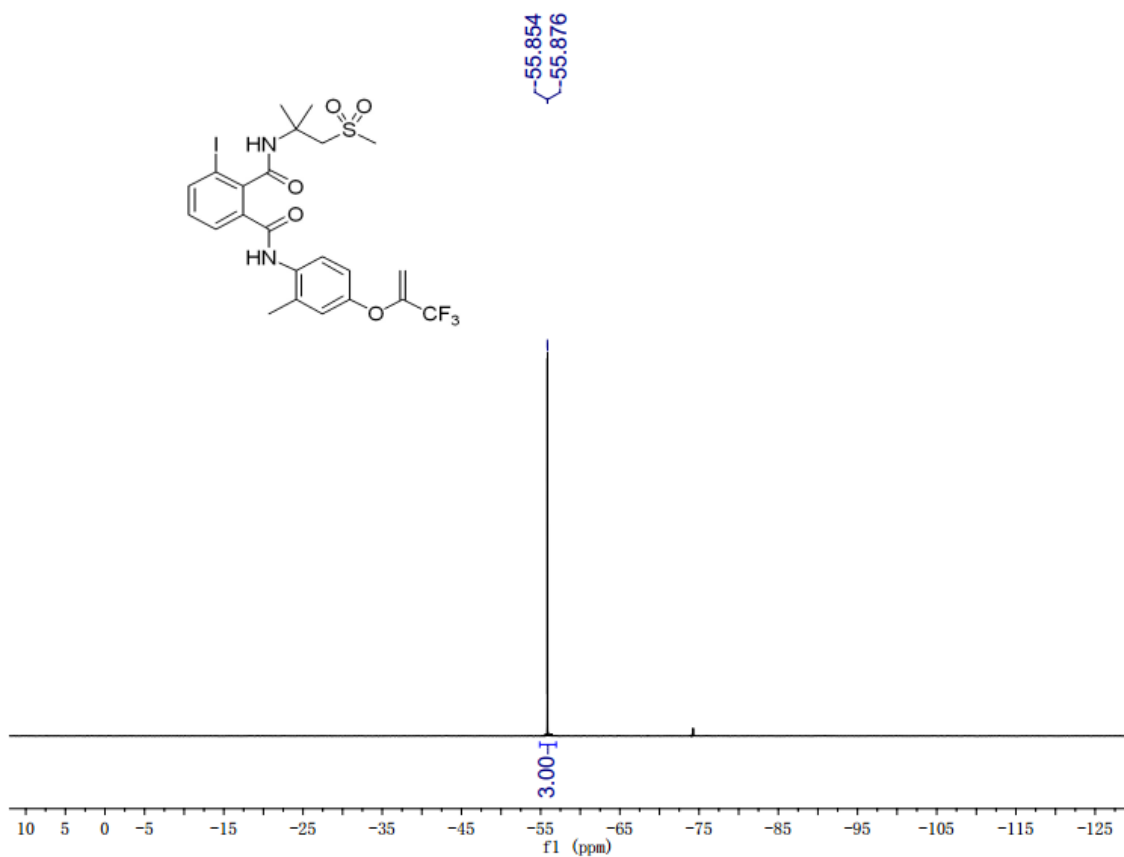

### HRMS (ESI) of 8c'

20200512 212 (2.072) Cm (212-(548+549))

1: TOF MS ES+  
5.23e4

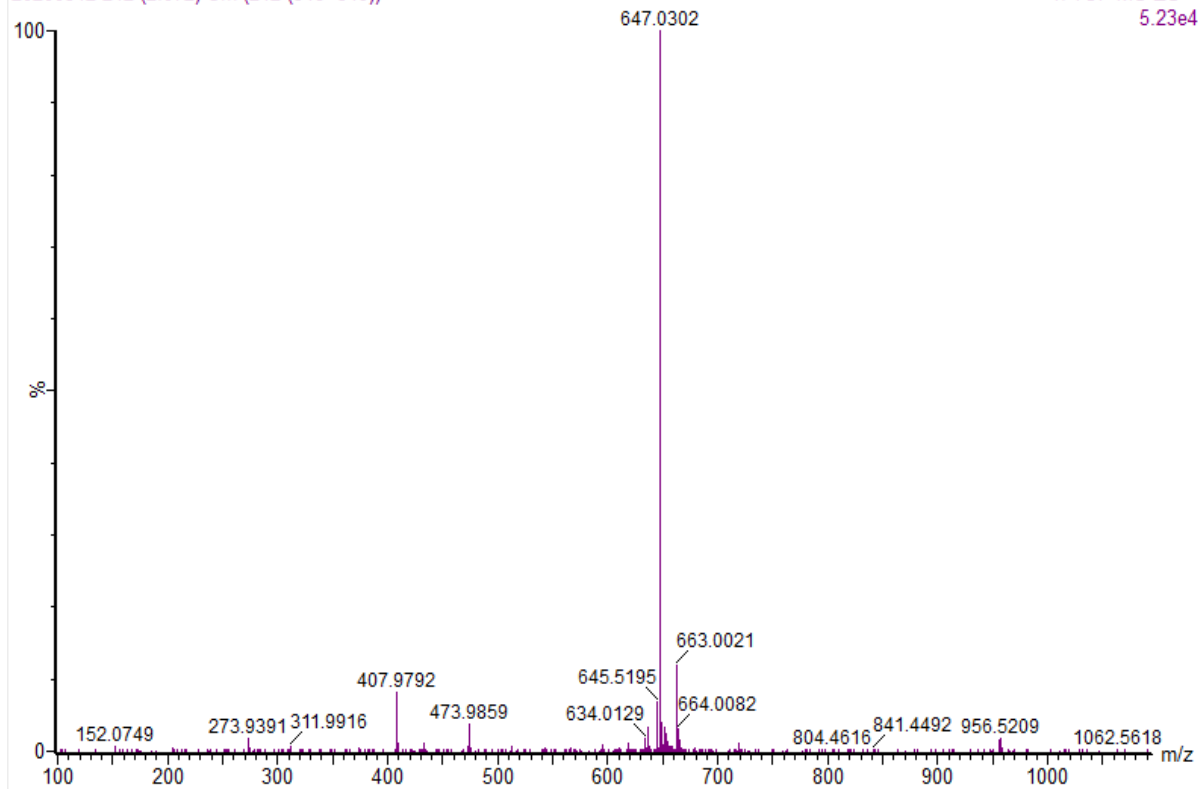

Supplement: d0ra07121h1.pdf [file d0ra07121h1.pdf]
